# Supplementary material for: The chemical mechanism of nitrogenase: calculated details of the intramolecular mechanism for hydrogenation of η2-N2 on FeMo-co to NH3
Source: Royal Society of Chemistry journal article supplement (doi:10.1039/b806100a), 2008-01-01
Supplement: b806100a.pdf [file b806100a.pdf]

## The chemical mechanism of nitrogenase: calculated details of the intramolecular mechanism for hydrogenation of $\eta^2\text{-N}_2$ on FeMo-co to $\text{NH}_3$ .

Ian Dance

† School of Chemistry, University of New South Wales, Sydney 2052, Australia. E-mail: i.dance@unsw.edu.au

### Electronic Supplementary Information

Details of the penultimate five water molecules in the water chain leading to S3B.

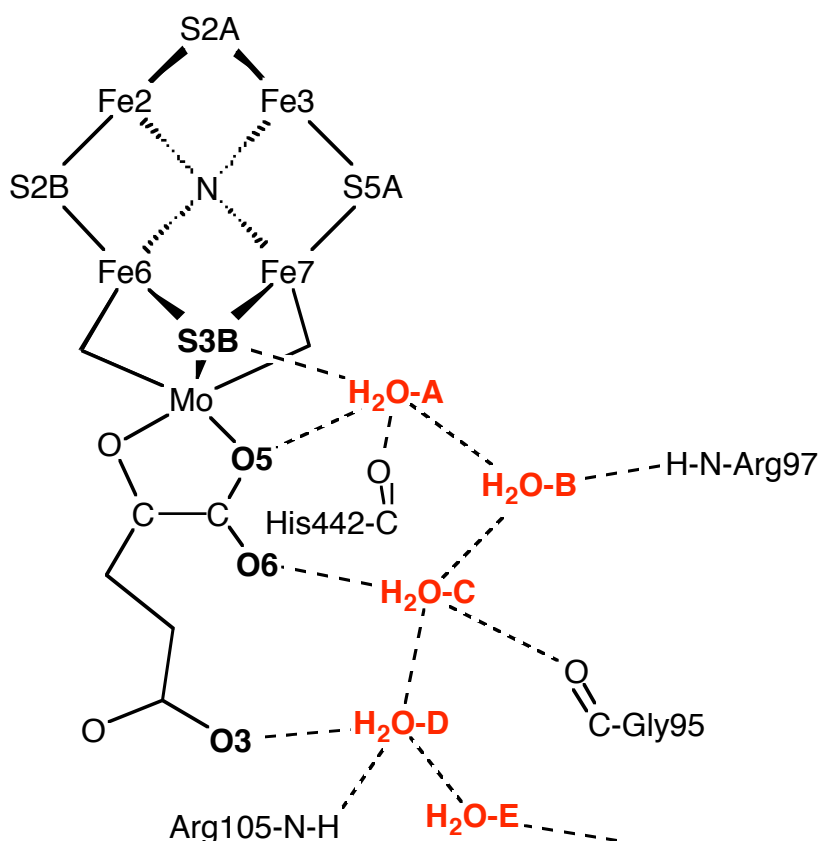

Arranged in order of decreasing diffraction resolution. Distances Å, angles °.

| PDB code resolution (Å) | FeMo-co ID | H <sub>2</sub> O-A, distance from S3B | H <sub>2</sub> O-B, distance from previous H <sub>2</sub> O, angle | H <sub>2</sub> O-C, distance from previous H <sub>2</sub> O, angle | H <sub>2</sub> O-D, distance from previous H <sub>2</sub> O, angle | H <sub>2</sub> O-E distance from previous H <sub>2</sub> O, angle |
|-------------------------|------------|---------------------------------------|--------------------------------------------------------------------|--------------------------------------------------------------------|--------------------------------------------------------------------|-------------------------------------------------------------------|
| 1M1N<br>1.16Å           | CFN6496    | HOH679<br>4.01                        | HOH15<br>2.88<br>94                                                | HOH259<br>2.84<br>144                                              | HOH24<br>2.84<br>103                                               | HOH50<br>2.82                                                     |

|               |                    |                 |                       |                        |                        |                 |
|---------------|--------------------|-----------------|-----------------------|------------------------|------------------------|-----------------|
| 1M1N          | CFN7496            | HOH381<br>4.04  | HOH363<br>2.85<br>93  | HOH533<br>2.86<br>144  | HOH86<br>2.83<br>104   | HOH53<br>2.80   |
| 1M1N          | CFN8496            | HOH3220<br>4.01 | HOH2552<br>2.88<br>94 | HOH2796<br>2.84<br>144 | HOH2561<br>2.84<br>103 | HOH2587<br>2.81 |
| 1M1N          | CFN9496            | HOH2920<br>4.04 | HOH2901<br>2.82<br>93 | HOH3073<br>2.86<br>143 | HOH2623<br>2.83<br>105 | HOH2590<br>2.78 |
| 1GQU<br>1.60Å | CFM503<br>chain A  | HOH10<br>4.05   | HOH12<br>2.83<br>95   | HOH9<br>2.86<br>141    | HOH609<br>2.86<br>106  | HOH7<br>2.79    |
| 1GQU          | CFM503<br>chain C  | HOH1396<br>4.05 | HOH1410<br>2.87<br>99 | HOH1393<br>2.78<br>140 | HOH1963<br>2.85<br>105 | HOH1376<br>2.84 |
| 1QH1<br>1.60Å | CFM503<br>chain A  | HOH13<br>4.02   | HOH12<br>2.90<br>93   | HOH2<br>2.85<br>140    | HOH584<br>2.88<br>107  | HOH3<br>2.79    |
| 1QH1          | CFM503<br>chain C  | HOH1335<br>4.06 | HOH1339<br>2.87<br>98 | HOH1344<br>2.79<br>138 | HOH1865<br>2.90<br>105 | HOH1311<br>2.83 |
| 1QH8<br>1.60  | CFM503<br>chain A  | HOH13<br>3.98   | HOH10<br>2.87<br>94   | HOH7<br>2.83<br>140    | HOH616<br>2.88<br>106  | HOH2<br>2.80    |
| 1QH8          | CFM503<br>chain C  | HOH1436<br>4.01 | HOH1432<br>2.82<br>98 | HOH1431<br>2.92<br>138 | HOH2033<br>2.86<br>105 | HOH1410<br>2.80 |
| 1H1L<br>1.90  | CFM1480<br>chain A | HOH310<br>3.81  | HOH68<br>3.05<br>92   | HOH312<br>2.75<br>142  | HOH108<br>2.61<br>110  | HOH294<br>2.85  |
| 1H1L          | CFM1480<br>chain B | HOH282<br>3.78  | HOH70<br>3.13<br>96   | HOH68<br>2.72<br>140   | HOH284<br>2.81<br>102  | HOH264<br>3.02  |
| 2MIN<br>2.03  | CFM496<br>chain A  | HOH47<br>4.21   | HOH32<br>2.59<br>101  | HOH31<br>2.70<br>149   | HOH39<br>2.71<br>103   | HOH64<br>2.69   |
| 2MIN          | CFM496<br>chain C  | HOH368<br>4.23  | HOH340<br>2.67<br>101 | HOH347<br>3.12<br>143  | HOH373<br>2.53<br>98   | HOH336<br>2.62  |
| 3MIN          | CFM496             | HOH47           | HOH32                 | HOH31                  | HOH39                  | HOH64           |

|              |                   |                 |                      |                        |                                                                      |                 |
|--------------|-------------------|-----------------|----------------------|------------------------|----------------------------------------------------------------------|-----------------|
| 2.03         | chain A           | 4.27            | 2.63<br>105          | 2.69<br>145            | 2.68<br>99                                                           | 2.60            |
| 3MIN         | CFM496<br>chain C | HOH368<br>4.12  | HOH340<br>2.57<br>98 | HOH347<br>2.70<br>146  | HOH373<br>2.54<br>108                                                | HOH336<br>2.76  |
| 2AFH<br>2.10 | CFN2496           | HOH99<br>4.05   | HOH265<br>2.87<br>89 | HOH309<br>2.92<br>146  | HOH1456<br>2.83<br>107                                               | HOH341<br>2.70  |
| 2AFH         | CFN3496           | HOH259<br>3.99  | HOH96<br>2.84<br>97  | HOH1074<br>2.75<br>146 | HOH314<br>2.85<br>102                                                | HOH1491<br>2.77 |
| 1G20<br>2.20 | CFM1496           | HOH24<br>4.16   | HOH35<br>3.06<br>94  | HOH98<br>2.84<br>151   | HOH144<br>2.77<br>100                                                | HOH39<br>2.82   |
| 1G20         | CFM3496           | HOH1059<br>3.76 | HOH607<br>3.28       | misplaced              | HOH778                                                               | missing         |
| 1M34<br>2.30 | CFM2096           | HOH4<br>4.10    | HOH284<br>2.91<br>90 | HOH330<br>2.90<br>153  | HOH94<br>2.95<br>113                                                 | HOH507<br>2.91  |
| 1M34         | CFM2296           | HOH103<br>4.23  | HOH715<br>2.99<br>94 | HOH1187<br>2.99<br>140 | HOH1025<br>3.01<br>92                                                | HOH262<br>2.81  |
| 1M34         | CFM4096           | HOH76<br>4.30   | HOH172<br>2.95<br>98 | HOH357<br>2.81<br>141  | HOH54<br>2.95<br>106                                                 | HOH847<br>2.90  |
| 1M34         | CFM4296           | HOH53<br>4.05   | HOH374<br>2.93<br>87 | HOH219<br>2.96<br>154  | HOH418<br>3.05<br>97                                                 | HOH517<br>3.07  |
| 2AFK<br>2.30 | CFN496 chain<br>A | HOH67<br>3.98   | HOH497<br>3.10<br>95 | HOH521<br>2.70<br>135  | HOH98<br>3.33<br>H-bonded<br>(2.93) to O6<br>of HCA<br>instead of O3 |                 |
| 2AFK         | CFN496 chain<br>C | HOH232<br>4.42  | HOH42<br>2.91<br>90  | HOH562<br>2.86<br>138  | HOH102<br>2.86<br>106                                                | HOH503<br>2.41  |

Cartesian coordinates for all intermediate structures and intermediates

| Structure/file                                        | Cartesian coordinates Å |              |              |              |      |   |    |       |
|-------------------------------------------------------|-------------------------|--------------|--------------|--------------|------|---|----|-------|
| Fig 2 (a)                                             |                         |              |              |              |      |   |    |       |
| <b>1H-a</b><br>s3b5s3b3tgvd<br>_1a.cmmf               | 40                      |              |              |              |      |   |    |       |
|                                                       | C1                      | 1.441367897  | 8.171447479  | 0.850446657  | dmol | 1 | C  | 0.000 |
|                                                       | H2                      | 2.345407106  | 7.767365869  | 0.375081793  | dmol | 1 | H  | 0.000 |
|                                                       | H3                      | 1.479507358  | 9.273647533  | 0.826482014  | dmol | 1 | H  | 0.000 |
|                                                       | H4                      | 1.414696105  | 7.838484307  | 1.896821206  | dmol | 1 | H  | 0.000 |
|                                                       | S5                      | -0.093273551 | 7.588024376  | -0.050678863 | dmol | 1 | S  | 0.000 |
|                                                       | C6                      | 0.762296305  | -3.455722607 | -2.678456171 | dmol | 1 | C  | 0.000 |
|                                                       | H7                      | 1.707927605  | -2.930435348 | -2.623103862 | dmol | 1 | H  | 0.000 |
|                                                       | N8                      | -0.190796514 | -3.277563154 | -1.691711400 | dmol | 1 | N  | 0.000 |
|                                                       | C9                      | 0.286185140  | -4.330044309 | -3.629313558 | dmol | 1 | C  | 0.000 |
|                                                       | H10                     | 0.717475748  | -4.725406849 | -4.541032220 | dmol | 1 | H  | 0.000 |
|                                                       | C11                     | -1.235786322 | -4.022037618 | -2.017920017 | dmol | 1 | C  | 0.000 |
|                                                       | H12                     | -2.129862659 | -4.105182543 | -1.411742797 | dmol | 1 | H  | 0.000 |
|                                                       | N13                     | -0.994311356 | -4.687531245 | -3.195218444 | dmol | 1 | N  | 0.000 |
|                                                       | H14                     | -1.645911166 | -5.296662995 | -3.675454679 | dmol | 1 | H  | 0.000 |
|                                                       | C15                     | -0.994638838 | -4.621702562 | 1.619991135  | dmol | 1 | C  | 0.000 |
|                                                       | H16                     | -1.432292170 | -5.601779720 | 1.330093596  | dmol | 1 | H  | 0.000 |
|                                                       | H17                     | -1.222147768 | -4.483924790 | 2.703190200  | dmol | 1 | H  | 0.000 |
|                                                       | C18                     | 0.546859746  | -4.748048968 | 1.516376988  | dmol | 1 | C  | 0.000 |
|                                                       | O19                     | 1.127968504  | -5.789851198 | 1.904908438  | dmol | 1 | O  | 0.000 |
|                                                       | O20                     | 1.128481088  | -3.692163017 | 1.019206620  | dmol | 1 | O  | 0.000 |
|                                                       | O21                     | -1.524279819 | -3.578129732 | 0.846427687  | dmol | 1 | O  | 0.000 |
|                                                       | Fe22                    | -0.100007843 | 5.333066772  | 0.298985890  | dmol | 1 | Fe | 0.000 |
|                                                       | Fe23                    | -1.529211270 | 3.070198019  | 1.152218039  | dmol | 1 | Fe | 0.000 |
|                                                       | Fe24                    | 1.176325660  | 2.987324317  | 1.297497527  | dmol | 1 | Fe | 0.000 |
|                                                       | Fe25                    | -0.063411077 | 3.031027391  | -1.155140184 | dmol | 1 | Fe | 0.000 |
|                                                       | Fe26                    | -0.108264629 | 0.424698733  | -1.134485671 | dmol | 1 | Fe | 0.000 |
|                                                       | Fe27                    | -1.550254522 | 0.485252208  | 1.027948057  | dmol | 1 | Fe | 0.000 |
|                                                       | Fe28                    | 1.116140044  | 0.305774862  | 1.271808073  | dmol | 1 | Fe | 0.000 |
|                                                       | Mo29                    | -0.189773299 | -2.010504104 | 0.342586033  | dmol | 1 | Mo | 0.000 |
|                                                       | S30                     | -1.919445209 | 4.387271188  | -0.713701525 | dmol | 1 | S  | 0.000 |
|                                                       | S31                     | -0.207435507 | 4.522140074  | 2.413987906  | dmol | 1 | S  | 0.000 |
|                                                       | S32                     | -0.022349504 | 1.707334734  | -2.970184788 | dmol | 1 | S  | 0.000 |
|                                                       | S33                     | 1.769086333  | 4.329972502  | -0.516703197 | dmol | 1 | S  | 0.000 |
|                                                       | S34                     | -2.041417666 | -0.818050806 | -0.682116358 | dmol | 1 | S  | 0.000 |
|                                                       | S35                     | -3.078529512 | 1.692656720  | 2.056454825  | dmol | 1 | S  | 0.000 |
|                                                       | S36                     | -0.001623923 | -1.202276046 | 2.718054411  | dmol | 1 | S  | 0.000 |
|                                                       | S37                     | 1.747469230  | -0.873937684 | -0.614004462 | dmol | 1 | S  | 0.000 |
|                                                       | S38                     | 2.582109267  | 1.620417838  | 2.373237934  | dmol | 1 | S  | 0.000 |
|                                                       | N39                     | -0.154536757 | 1.704715822  | 0.399187924  | dmol | 1 | N  | 0.000 |
|                                                       | H40                     | 1.080257193  | -1.989865450 | 3.059975243  | dmol | 1 | H  | 0.000 |
| <b>1H-ab</b><br>s3b5s3b3thz02<br>_1_3932.02a.c<br>mmf | 40                      |              |              |              |      |   |    |       |
|                                                       | C1                      | 1.401966193  | 8.122604015  | 0.963253239  | dmol | 1 | C  | 0.000 |
|                                                       | H2                      | 2.248706035  | 7.692026288  | 0.413191631  | dmol | 1 | H  | 0.000 |
|                                                       | H3                      | 1.477954181  | 9.223586715  | 0.941181088  | dmol | 1 | H  | 0.000 |
|                                                       | H4                      | 1.455723070  | 7.783569188  | 2.007470188  | dmol | 1 | H  | 0.000 |
|                                                       | S5                      | -0.210884402 | 7.584323906  | 0.175171817  | dmol | 1 | S  | 0.000 |
|                                                       | C6                      | 0.803237785  | -3.529386346 | -2.649976010 | dmol | 1 | C  | 0.000 |
|                                                       | H7                      | 1.771334213  | -3.054352815 | -2.556535391 | dmol | 1 | H  | 0.000 |
|                                                       | N8                      | -0.173038753 | -3.313150316 | -1.691530229 | dmol | 1 | N  | 0.000 |
|                                                       | C9                      | 0.313926148  | -4.361770068 | -3.630777460 | dmol | 1 | C  | 0.000 |
|                                                       | H10                     | 0.753632459  | -4.759877609 | -4.537736307 | dmol | 1 | H  | 0.000 |
|                                                       | C11                     | -1.244937747 | -3.997671643 | -2.065951851 | dmol | 1 | C  | 0.000 |
|                                                       | H12                     | -2.168300762 | -4.042054517 | -1.502707612 | dmol | 1 | H  | 0.000 |
|                                                       | N13                     | -0.997609337 | -4.656910141 | -3.245851504 | dmol | 1 | N  | 0.000 |
|                                                       | H14                     | -1.663113452 | -5.218420638 | -3.764314358 | dmol | 1 | H  | 0.000 |
|                                                       | C15                     | -1.002192583 | -4.651733692 | 1.625672051  | dmol | 1 | C  | 0.000 |
|                                                       | H16                     | -1.485575946 | -5.613630934 | 1.347671392  | dmol | 1 | H  | 0.000 |
|                                                       | H17                     | -1.199711190 | -4.513608109 | 2.714374007  | dmol | 1 | H  | 0.000 |
|                                                       | C18                     | 0.528520072  | -4.832245254 | 1.481396768  | dmol | 1 | C  | 0.000 |
|                                                       | O19                     | 1.083297401  | -5.892455212 | 1.853023335  | dmol | 1 | O  | 0.000 |
|                                                       | O20                     | 1.136322410  | -3.795358255 | 0.970400333  | dmol | 1 | O  | 0.000 |
|                                                       | O21                     | -1.509394958 | -3.583146754 | 0.875009054  | dmol | 1 | O  | 0.000 |
|                                                       | Fe22                    | -0.143198959 | 5.299901101  | 0.315697447  | dmol | 1 | Fe | 0.000 |
|                                                       | Fe23                    | -1.450574724 | 2.998671688  | 1.130299261  | dmol | 1 | Fe | 0.000 |
|                                                       | Fe24                    | 1.247699118  | 3.020831525  | 1.124464221  | dmol | 1 | Fe | 0.000 |
|                                                       | Fe25                    | -0.107479695 | 2.991302326  | -1.222231644 | dmol | 1 | Fe | 0.000 |
|                                                       | Fe26                    | -0.065174039 | 0.366855445  | -1.167584955 | dmol | 1 | Fe | 0.000 |

|                                                |      |              |              |              |      |   |    |       |
|------------------------------------------------|------|--------------|--------------|--------------|------|---|----|-------|
|                                                | Fe27 | -1.459358264 | 0.377337351  | 1.176319420  | dmol | 1 | Fe | 0.000 |
|                                                | Fe28 | 1.329916163  | 0.384555920  | 1.117601440  | dmol | 1 | Fe | 0.000 |
|                                                | Mo29 | -0.118361036 | -2.075830059 | 0.340431759  | dmol | 1 | Mo | 0.000 |
|                                                | S30  | -1.942705724 | 4.340924286  | -0.694050445 | dmol | 1 | S  | 0.000 |
|                                                | S31  | -0.114739544 | 4.434536733  | 2.404403166  | dmol | 1 | S  | 0.000 |
|                                                | S32  | -0.071674795 | 1.636092045  | -3.007146625 | dmol | 1 | S  | 0.000 |
|                                                | S33  | 1.669151466  | 4.396276628  | -0.697521837 | dmol | 1 | S  | 0.000 |
|                                                | S34  | -1.983214000 | -0.862170857 | -0.639917639 | dmol | 1 | S  | 0.000 |
|                                                | S35  | -3.025533705 | 1.674153495  | 2.060825110  | dmol | 1 | S  | 0.000 |
|                                                | S36  | -0.038132371 | -0.818586479 | 2.556466773  | dmol | 1 | S  | 0.000 |
|                                                | S37  | 1.805075298  | -0.946431658 | -0.686418493 | dmol | 1 | S  | 0.000 |
|                                                | S38  | 2.877738262  | 1.729546856  | 1.985513786  | dmol | 1 | S  | 0.000 |
|                                                | N39  | -0.079640443 | 1.682149200  | 0.351552860  | dmol | 1 | N  | 0.000 |
|                                                | H40  | 0.350346156  | -1.220453352 | 3.828862215  | dmol | 1 | H  | 0.000 |
| <b>1H-b</b><br>s3b5s3b3tevd_<br>1a.cmmf        | 40   |              |              |              |      |   |    |       |
|                                                | C1   | 1.416863429  | 8.147306415  | 0.839003887  | dmol | 1 | C  | 0.000 |
|                                                | H2   | 2.285730264  | 7.766849551  | 0.284067709  | dmol | 1 | H  | 0.000 |
|                                                | H3   | 1.424491091  | 9.250635729  | 0.810023214  | dmol | 1 | H  | 0.000 |
|                                                | H4   | 1.494538722  | 7.815564028  | 1.883369035  | dmol | 1 | H  | 0.000 |
|                                                | S5   | -0.178610579 | 7.514548329  | 0.088448433  | dmol | 1 | S  | 0.000 |
|                                                | C6   | 0.724602284  | -3.479319726 | -2.713966175 | dmol | 1 | C  | 0.000 |
|                                                | H7   | 1.683386348  | -2.976236099 | -2.685884442 | dmol | 1 | H  | 0.000 |
|                                                | N8   | -0.195804536 | -3.283501907 | -1.700081797 | dmol | 1 | N  | 0.000 |
|                                                | C9   | 0.202886650  | -4.340895306 | -3.652427425 | dmol | 1 | C  | 0.000 |
|                                                | H10  | 0.599948380  | -4.745443414 | -4.575416506 | dmol | 1 | H  | 0.000 |
|                                                | C11  | -1.265718249 | -4.005696211 | -1.996871013 | dmol | 1 | C  | 0.000 |
|                                                | H12  | -2.144555318 | -4.072070568 | -1.366794202 | dmol | 1 | H  | 0.000 |
|                                                | N13  | -1.072335881 | -4.671444832 | -3.182626108 | dmol | 1 | N  | 0.000 |
|                                                | H14  | -1.746681383 | -5.273866070 | -3.639284187 | dmol | 1 | H  | 0.000 |
|                                                | C15  | -0.871996362 | -4.643810718 | 1.620728919  | dmol | 1 | C  | 0.000 |
|                                                | H16  | -1.358957146 | -5.610356139 | 1.370716173  | dmol | 1 | H  | 0.000 |
|                                                | H17  | -1.009130126 | -4.495575607 | 2.716814828  | dmol | 1 | H  | 0.000 |
|                                                | C18  | 0.651380637  | -4.806910412 | 1.399286594  | dmol | 1 | C  | 0.000 |
|                                                | O19  | 1.229665640  | -5.875141165 | 1.712756279  | dmol | 1 | O  | 0.000 |
|                                                | O20  | 1.227569633  | -3.751876696 | 0.892493345  | dmol | 1 | O  | 0.000 |
|                                                | O21  | -1.439015609 | -3.587087425 | 0.890633223  | dmol | 1 | O  | 0.000 |
|                                                | Fe22 | -0.056049224 | 5.247999327  | 0.327612192  | dmol | 1 | Fe | 0.000 |
|                                                | Fe23 | -1.327877825 | 2.983348966  | 1.298094013  | dmol | 1 | Fe | 0.000 |
|                                                | Fe24 | 1.317114875  | 2.977781837  | 1.194042383  | dmol | 1 | Fe | 0.000 |
|                                                | Fe25 | -0.083815093 | 2.890732026  | -1.109551761 | dmol | 1 | Fe | 0.000 |
|                                                | Fe26 | -0.093063187 | 0.333026971  | -1.134347960 | dmol | 1 | Fe | 0.000 |
|                                                | Fe27 | -1.381078800 | 0.370366393  | 1.248878223  | dmol | 1 | Fe | 0.000 |
|                                                | Fe28 | 1.298204313  | 0.330366728  | 1.207769165  | dmol | 1 | Fe | 0.000 |
|                                                | Mo29 | -0.096722757 | -2.039205989 | 0.332432214  | dmol | 1 | Mo | 0.000 |
|                                                | S30  | -1.851851451 | 4.222635699  | -0.639357309 | dmol | 1 | S  | 0.000 |
|                                                | S31  | 0.031894422  | 4.460774426  | 2.470210129  | dmol | 1 | S  | 0.000 |
|                                                | S32  | -0.141595282 | 1.675010747  | -2.939219122 | dmol | 1 | S  | 0.000 |
|                                                | S33  | 1.696021233  | 4.250712381  | -0.742534203 | dmol | 1 | S  | 0.000 |
|                                                | S34  | -2.004540388 | -0.834367528 | -0.551559223 | dmol | 1 | S  | 0.000 |
|                                                | S35  | -2.813663952 | 1.644531656  | 2.377507323  | dmol | 1 | S  | 0.000 |
|                                                | S36  | 0.203838174  | -1.207707780 | 2.711723072  | dmol | 1 | S  | 0.000 |
|                                                | S37  | 1.811648170  | -0.899112866 | -0.663497042 | dmol | 1 | S  | 0.000 |
|                                                | S38  | 2.871385692  | 1.648784234  | 2.118159309  | dmol | 1 | S  | 0.000 |
|                                                | N39  | -0.034036061 | 1.675589021  | 0.437254110  | dmol | 1 | N  | 0.000 |
|                                                | H40  | -1.004070748 | -0.606937913 | 3.061404775  | dmol | 1 | H  | 0.000 |
| <b>1H-bc</b><br>s3b2fe6ta9_1_<br>3939.97a.cmmf | 40   |              |              |              |      |   |    |       |
|                                                | C1   | 1.559009719  | 8.017849133  | 0.973269332  | dmol | 1 | C  | 0.000 |
|                                                | H2   | 2.380264025  | 7.579002888  | 0.389723996  | dmol | 1 | H  | 0.000 |
|                                                | H3   | 1.668655493  | 9.117298339  | 0.986964295  | dmol | 1 | H  | 0.000 |
|                                                | H4   | 1.621276635  | 7.638297088  | 2.004028150  | dmol | 1 | H  | 0.000 |
|                                                | S5   | -0.089849024 | 7.561630299  | 0.200783159  | dmol | 1 | S  | 0.000 |
|                                                | C6   | 0.897912246  | -3.613820509 | -2.610829196 | dmol | 1 | C  | 0.000 |
|                                                | H7   | 1.895643427  | -3.211831792 | -2.481870177 | dmol | 1 | H  | 0.000 |
|                                                | N8   | -0.086532631 | -3.357079033 | -1.674293287 | dmol | 1 | N  | 0.000 |
|                                                | C9   | 0.381635924  | -4.391862844 | -3.623429168 | dmol | 1 | C  | 0.000 |
|                                                | H10  | 0.814571640  | -4.797127976 | -4.530274165 | dmol | 1 | H  | 0.000 |
|                                                | C11  | -1.189616095 | -3.957525705 | -2.090724996 | dmol | 1 | C  | 0.000 |
|                                                | H12  | -2.131558249 | -3.940169224 | -1.557489435 | dmol | 1 | H  | 0.000 |
|                                                | N13  | -0.957131478 | -4.607428765 | -3.277827642 | dmol | 1 | N  | 0.000 |
|                                                | H14  | -1.657687877 | -5.074798410 | -3.841101946 | dmol | 1 | H  | 0.000 |
|                                                | C15  | -0.847128994 | -4.587093026 | 1.727927480  | dmol | 1 | C  | 0.000 |
|                                                | H16  | -1.292830919 | -5.586086254 | 1.533217382  | dmol | 1 | H  | 0.000 |
|                                                | H17  | -1.029821171 | -4.360962016 | 2.805512976  | dmol | 1 | H  | 0.000 |
|                                                | C18  | 0.689673752  | -4.709949863 | 1.570489982  | dmol | 1 | C  | 0.000 |
|                                                | O19  | 1.294744597  | -5.725357518 | 1.986929527  | dmol | 1 | O  | 0.000 |
|                                                | O20  | 1.243007216  | -3.674232804 | 0.997319049  | dmol | 1 | O  | 0.000 |
|                                                | O21  | -1.418079223 | -3.607638230 | 0.899649477  | dmol | 1 | O  | 0.000 |

|                                                |      |               |              |              |      |   |    |       |
|------------------------------------------------|------|---------------|--------------|--------------|------|---|----|-------|
|                                                | Fe22 | -0.094549511  | 5.274407726  | 0.326881570  | dmol | 1 | Fe | 0.000 |
|                                                | Fe23 | -1.445644815  | 2.958427842  | 1.129709020  | dmol | 1 | Fe | 0.000 |
|                                                | Fe24 | 1.275105815   | 2.974998062  | 1.161647033  | dmol | 1 | Fe | 0.000 |
|                                                | Fe25 | -0.074018397  | 2.997845526  | -1.191029928 | dmol | 1 | Fe | 0.000 |
|                                                | Fe26 | -0.115696715  | 0.395712009  | -1.154953033 | dmol | 1 | Fe | 0.000 |
|                                                | Fe27 | -1.583031612  | 0.250350267  | 1.246801274  | dmol | 1 | Fe | 0.000 |
|                                                | Fe28 | 1.168019284   | 0.344257785  | 1.187014265  | dmol | 1 | Fe | 0.000 |
|                                                | Mo29 | -0.115081203  | -2.035979514 | 0.322666369  | dmol | 1 | Mo | 0.000 |
|                                                | S30  | -1.937635954  | 4.331077805  | -0.659577141 | dmol | 1 | S  | 0.000 |
|                                                | S31  | -0.096033798  | 4.393984718  | 2.409246750  | dmol | 1 | S  | 0.000 |
|                                                | S32  | -0.099101355  | 1.653593822  | -2.996041670 | dmol | 1 | S  | 0.000 |
|                                                | S33  | 1.745033776   | 4.351683996  | -0.648248168 | dmol | 1 | S  | 0.000 |
|                                                | S34  | -2.014209885  | -0.905626751 | -0.659533771 | dmol | 1 | S  | 0.000 |
|                                                | S35  | -3.043465566  | 1.681786984  | 2.083202407  | dmol | 1 | S  | 0.000 |
|                                                | S36  | -0.085836301  | -1.068372921 | 2.603952452  | dmol | 1 | S  | 0.000 |
|                                                | S37  | 1.767197572   | -0.870439440 | -0.657853027 | dmol | 1 | S  | 0.000 |
|                                                | S38  | 2.739884074   | 1.596635544  | 2.164986818  | dmol | 1 | S  | 0.000 |
|                                                | N39  | -0.072641670  | 1.691417332  | 0.371205961  | dmol | 1 | N  | 0.000 |
|                                                | H40  | -1.664452756  | -0.726874571 | 2.580348024  | dmol | 1 | H  | 0.000 |
| <b>1H-c</b><br>fe6hs2btb3vd_<br>1a.cmmf        | 40   |               |              |              |      |   |    |       |
|                                                | C1   | 1.599205953   | 8.020739594  | 1.010438934  | dmol | 1 | C  | 0.000 |
|                                                | H2   | 2.449689538   | 7.593546899  | 0.464049916  | dmol | 1 | H  | 0.000 |
|                                                | H3   | 1.690999848   | 9.118848854  | 1.032097529  | dmol | 1 | H  | 0.000 |
|                                                | H4   | 1.617933297   | 7.636645916  | 2.039202059  | dmol | 1 | H  | 0.000 |
|                                                | S5   | -0.009305054  | 7.555719181  | 0.169180289  | dmol | 1 | S  | 0.000 |
|                                                | C6   | 0.912882371   | -3.717756544 | -2.576929362 | dmol | 1 | C  | 0.000 |
|                                                | H7   | 1.922807856   | -3.369335286 | -2.399206446 | dmol | 1 | H  | 0.000 |
|                                                | N8   | -0.102062367  | -3.404726978 | -1.691225028 | dmol | 1 | N  | 0.000 |
|                                                | C9   | 0.411121677   | -4.471695402 | -3.615380590 | dmol | 1 | C  | 0.000 |
|                                                | H10  | 0.867522081   | -4.900662934 | -4.499672141 | dmol | 1 | H  | 0.000 |
|                                                | C11  | -1.208576301  | -3.952966046 | -2.162112634 | dmol | 1 | C  | 0.000 |
|                                                | H12  | -2.177852475  | -3.891654470 | -1.683778100 | dmol | 1 | H  | 0.000 |
|                                                | N13  | -0.951542345  | -4.621347080 | -3.336947320 | dmol | 1 | N  | 0.000 |
|                                                | H14  | -1.641989404  | -5.061970206 | -3.934179122 | dmol | 1 | H  | 0.000 |
|                                                | C15  | -0.893460524  | -4.564673731 | 1.734468152  | dmol | 1 | C  | 0.000 |
|                                                | H16  | -1.361697903  | -5.549712011 | 1.532985601  | dmol | 1 | H  | 0.000 |
|                                                | H17  | -1.067339012  | -4.338376620 | 2.811710265  | dmol | 1 | H  | 0.000 |
|                                                | C18  | 0.638210949   | -4.709905625 | 1.564107553  | dmol | 1 | C  | 0.000 |
|                                                | O19  | 1.229580500   | -5.752549245 | 1.931390719  | dmol | 1 | O  | 0.000 |
|                                                | O20  | 1.203744019   | -3.661051312 | 1.034247646  | dmol | 1 | O  | 0.000 |
|                                                | O21  | -1.445803045  | -3.567283997 | 0.913058460  | dmol | 1 | O  | 0.000 |
|                                                | Fe22 | 0.014915684   | 5.283607642  | 0.371177605  | dmol | 1 | Fe | 0.000 |
|                                                | Fe23 | -1.375563222  | 2.966627748  | 1.177564657  | dmol | 1 | Fe | 0.000 |
|                                                | Fe24 | 1.391668833   | 2.971981573  | 1.219838351  | dmol | 1 | Fe | 0.000 |
|                                                | Fe25 | 0.037488332   | 3.026697185  | -1.122419345 | dmol | 1 | Fe | 0.000 |
|                                                | Fe26 | -0.113876563  | 0.439787523  | -1.112746932 | dmol | 1 | Fe | 0.000 |
|                                                | Fe27 | -1.597388364  | 0.161261047  | 1.329345696  | dmol | 1 | Fe | 0.000 |
|                                                | Fe28 | 1.214900087   | 0.339463038  | 1.208880153  | dmol | 1 | Fe | 0.000 |
|                                                | Mo29 | -0.150106903  | -2.005582859 | 0.392511749  | dmol | 1 | Mo | 0.000 |
|                                                | S30  | -1.834477487  | 4.357173118  | -0.609163681 | dmol | 1 | S  | 0.000 |
|                                                | S31  | -0.009600406  | 4.396348398  | 2.449079058  | dmol | 1 | S  | 0.000 |
|                                                | S32  | -0.0057529618 | 1.713146128  | -2.952744731 | dmol | 1 | S  | 0.000 |
|                                                | S33  | 1.878277479   | 4.363479625  | -0.575831746 | dmol | 1 | S  | 0.000 |
|                                                | S34  | -1.999450421  | -0.827377985 | -0.671849746 | dmol | 1 | S  | 0.000 |
|                                                | S35  | -2.992410342  | 1.729803114  | 2.090856000  | dmol | 1 | S  | 0.000 |
|                                                | S36  | -0.077737838  | -0.983884316 | 2.574882804  | dmol | 1 | S  | 0.000 |
|                                                | S37  | 1.739299100   | -0.883518876 | -0.666552775 | dmol | 1 | S  | 0.000 |
|                                                | S38  | 2.830960083   | 1.552382623  | 2.179922508  | dmol | 1 | S  | 0.000 |
|                                                | N39  | 0.011267294   | 1.755131171  | 0.377483603  | dmol | 1 | N  | 0.000 |
|                                                | H40  | -2.594705387  | -0.746358953 | 2.002715232  | dmol | 1 | H  | 0.000 |
| <b>1H-cd</b><br>fe6hs2btb9_1_<br>3943.47a.cmmf | 40   |               |              |              |      |   |    |       |
|                                                | C1   | 1.612726843   | 7.961806746  | 1.078176851  | dmol | 1 | C  | 0.000 |
|                                                | H2   | 2.444446958   | 7.535538668  | 0.499991549  | dmol | 1 | H  | 0.000 |
|                                                | H3   | 1.728436750   | 9.058893169  | 1.124317337  | dmol | 1 | H  | 0.000 |
|                                                | H4   | 1.652755001   | 7.552818969  | 2.097983488  | dmol | 1 | H  | 0.000 |
|                                                | S5   | -0.022720582  | 7.541843746  | 0.263842198  | dmol | 1 | S  | 0.000 |
|                                                | C6   | 0.939331191   | -3.740670835 | -2.574238559 | dmol | 1 | C  | 0.000 |
|                                                | H7   | 1.954656980   | -3.414685895 | -2.383649995 | dmol | 1 | H  | 0.000 |
|                                                | N8   | -0.074284577  | -3.415690334 | -1.692126268 | dmol | 1 | N  | 0.000 |
|                                                | C9   | 0.426037792   | -4.463234339 | -3.629199456 | dmol | 1 | C  | 0.000 |
|                                                | H10  | 0.878463625   | -4.889637864 | -4.516651148 | dmol | 1 | H  | 0.000 |
|                                                | C11  | -1.191662621  | -3.923478267 | -2.181803258 | dmol | 1 | C  | 0.000 |
|                                                | H12  | -2.163865680  | -3.834220415 | -1.714355026 | dmol | 1 | H  | 0.000 |
|                                                | N13  | -0.942727573  | -4.579868599 | -3.364467071 | dmol | 1 | N  | 0.000 |
|                                                | H14  | -1.640758331  | -4.985779462 | -3.976764742 | dmol | 1 | H  | 0.000 |
|                                                | C15  | -0.894282102  | -4.566879380 | 1.748854299  | dmol | 1 | C  | 0.000 |
|                                                | H16  | -1.368678196  | -5.553089854 | 1.562657320  | dmol | 1 | H  | 0.000 |

|                                         |      |              |              |              |      |   |    |       |
|-----------------------------------------|------|--------------|--------------|--------------|------|---|----|-------|
|                                         | H17  | -1.074997081 | -4.319887044 | 2.821424964  | dmol | 1 | H  | 0.000 |
|                                         | C18  | 0.636653786  | -4.730406257 | 1.596080332  | dmol | 1 | C  | 0.000 |
|                                         | O19  | 1.216995674  | -5.763479639 | 2.004152536  | dmol | 1 | O  | 0.000 |
|                                         | O20  | 1.217904997  | -3.705427083 | 1.033509837  | dmol | 1 | O  | 0.000 |
|                                         | O21  | -1.432863652 | -3.580912631 | 0.906775616  | dmol | 1 | O  | 0.000 |
|                                         | Fe22 | -0.104147623 | 5.263434093  | 0.375821628  | dmol | 1 | Fe | 0.000 |
|                                         | Fe23 | -1.395794735 | 2.921606747  | 1.124823407  | dmol | 1 | Fe | 0.000 |
|                                         | Fe24 | 1.328033254  | 2.963565734  | 1.152866389  | dmol | 1 | Fe | 0.000 |
|                                         | Fe25 | -0.041134853 | 2.958773183  | -1.175841278 | dmol | 1 | Fe | 0.000 |
|                                         | Fe26 | -0.060322725 | 0.352769207  | -1.164707784 | dmol | 1 | Fe | 0.000 |
|                                         | Fe27 | -1.441438682 | 0.228072443  | 1.235501485  | dmol | 1 | Fe | 0.000 |
|                                         | Fe28 | 1.268544357  | 0.314754248  | 1.170712245  | dmol | 1 | Fe | 0.000 |
|                                         | Mo29 | -0.103251787 | -2.033348420 | 0.392475868  | dmol | 1 | Mo | 0.000 |
|                                         | S30  | -1.915854609 | 4.276377556  | -0.646256825 | dmol | 1 | S  | 0.000 |
|                                         | S31  | -0.056279813 | 4.353572987  | 2.430635581  | dmol | 1 | S  | 0.000 |
|                                         | S32  | -0.054442497 | 1.618725746  | -3.001709902 | dmol | 1 | S  | 0.000 |
|                                         | S33  | 1.727191208  | 4.384033032  | -0.650139342 | dmol | 1 | S  | 0.000 |
|                                         | S34  | -1.956181999 | -0.890758471 | -0.680957811 | dmol | 1 | S  | 0.000 |
|                                         | S35  | -3.015659951 | 1.662117100  | 2.151983268  | dmol | 1 | S  | 0.000 |
|                                         | S36  | -0.037420501 | -0.992433654 | 2.556638841  | dmol | 1 | S  | 0.000 |
|                                         | S37  | 1.805080464  | -0.930346500 | -0.684014587 | dmol | 1 | S  | 0.000 |
|                                         | S38  | 2.840011655  | 1.632254941  | 2.108416578  | dmol | 1 | S  | 0.000 |
|                                         | N39  | -0.015464611 | 1.679984907  | 0.349971666  | dmol | 1 | N  | 0.000 |
|                                         | H40  | -2.673035756 | 0.053291719  | 2.249269772  | dmol | 1 | H  | 0.000 |
| <b>1H-d</b><br>fe6hs2bta4vd_<br>1a.cmmf | 40   |              |              |              |      |   |    |       |
|                                         | C1   | 1.546046230  | 8.008697409  | 1.003880932  | dmol | 1 | C  | 0.000 |
|                                         | H2   | 2.358817397  | 7.561835865  | 0.415425346  | dmol | 1 | H  | 0.000 |
|                                         | H3   | 1.629287929  | 9.108584810  | 0.966798443  | dmol | 1 | H  | 0.000 |
|                                         | H4   | 1.647063961  | 7.676040863  | 2.046690434  | dmol | 1 | H  | 0.000 |
|                                         | S5   | -0.110363420 | 7.489160134  | 0.303962678  | dmol | 1 | S  | 0.000 |
|                                         | C6   | 0.947378468  | -3.753054926 | -2.674543064 | dmol | 1 | C  | 0.000 |
|                                         | H7   | 1.951924450  | -3.373654727 | -2.530840270 | dmol | 1 | H  | 0.000 |
|                                         | N8   | -0.045373662 | -3.458811091 | -1.759179743 | dmol | 1 | N  | 0.000 |
|                                         | C9   | 0.431618881  | -4.532179798 | -3.687425751 | dmol | 1 | C  | 0.000 |
|                                         | H10  | 0.869341622  | -4.956770962 | -4.583245296 | dmol | 1 | H  | 0.000 |
|                                         | C11  | -1.152186386 | -4.042925501 | -2.183811515 | dmol | 1 | C  | 0.000 |
|                                         | H12  | -2.101620026 | -4.003456026 | -1.664664421 | dmol | 1 | H  | 0.000 |
|                                         | N13  | -0.916237130 | -4.716582111 | -3.359516090 | dmol | 1 | N  | 0.000 |
|                                         | H14  | -1.614862068 | -5.180197253 | -3.928772573 | dmol | 1 | H  | 0.000 |
|                                         | C15  | -0.922167444 | -4.562499426 | 1.665640551  | dmol | 1 | C  | 0.000 |
|                                         | H16  | -1.404155500 | -5.547858372 | 1.493619219  | dmol | 1 | H  | 0.000 |
|                                         | H17  | -1.112824098 | -4.290391871 | 2.730820029  | dmol | 1 | H  | 0.000 |
|                                         | C18  | 0.611144027  | -4.746907644 | 1.540549298  | dmol | 1 | C  | 0.000 |
|                                         | O19  | 1.167427711  | -5.793118272 | 1.955510200  | dmol | 1 | O  | 0.000 |
|                                         | O20  | 1.214450838  | -3.728207900 | 0.996404143  | dmol | 1 | O  | 0.000 |
|                                         | O21  | -1.435227752 | -3.590170952 | 0.789789908  | dmol | 1 | O  | 0.000 |
|                                         | Fe22 | -0.147024852 | 5.222667680  | 0.487147036  | dmol | 1 | Fe | 0.000 |
|                                         | Fe23 | -1.393832254 | 2.863763673  | 1.112758526  | dmol | 1 | Fe | 0.000 |
|                                         | Fe24 | 1.288472928  | 2.858767579  | 1.300336705  | dmol | 1 | Fe | 0.000 |
|                                         | Fe25 | 0.038498030  | 2.987040951  | -1.130386491 | dmol | 1 | Fe | 0.000 |
|                                         | Fe26 | 0.025056594  | 0.368192586  | -1.236061209 | dmol | 1 | Fe | 0.000 |
|                                         | Fe27 | -1.347221616 | 0.248864925  | 1.038991599  | dmol | 1 | Fe | 0.000 |
|                                         | Fe28 | 1.306190075  | 0.197959944  | 1.176739646  | dmol | 1 | Fe | 0.000 |
|                                         | Mo29 | -0.095512146 | -2.049636785 | 0.276262809  | dmol | 1 | Mo | 0.000 |
|                                         | S30  | -1.882970689 | 4.243187051  | -0.638471994 | dmol | 1 | S  | 0.000 |
|                                         | S31  | -0.177175742 | 4.251924765  | 2.532077564  | dmol | 1 | S  | 0.000 |
|                                         | S32  | 0.154757944  | 1.757344741  | -3.000971151 | dmol | 1 | S  | 0.000 |
|                                         | S33  | 1.770752819  | 4.371342745  | -0.406030802 | dmol | 1 | S  | 0.000 |
|                                         | S34  | -1.919312778 | -0.856751010 | -0.855719503 | dmol | 1 | S  | 0.000 |
|                                         | S35  | -3.045024855 | 1.448040507  | 2.077905153  | dmol | 1 | S  | 0.000 |
|                                         | S36  | -0.159235129 | -1.039257455 | 2.473546943  | dmol | 1 | S  | 0.000 |
|                                         | S37  | 1.854823322  | -0.972567809 | -0.726487989 | dmol | 1 | S  | 0.000 |
|                                         | S38  | 2.803066769  | 1.509154330  | 2.233255620  | dmol | 1 | S  | 0.000 |
|                                         | N39  | -0.018136919 | 1.593894668  | 0.376187129  | dmol | 1 | N  | 0.000 |
|                                         | H40  | -2.615655530 | 1.428534665  | 3.371827953  | dmol | 1 | H  | 0.000 |
| <b>Fig 2 (b)</b>                        |      |              |              |              |      |   |    |       |
| <b>2H-a</b><br>s2bhs3bh5te9_<br>5a.cmmf | 41   |              |              |              |      |   |    |       |
|                                         | C1   | 1.441287229  | 8.188923932  | 0.894661725  | dmol | 1 | C  | 0.000 |
|                                         | H2   | 2.312053456  | 7.805705509  | 0.345171856  | dmol | 1 | H  | 0.000 |
|                                         | H3   | 1.483413021  | 9.290496269  | 0.910511430  | dmol | 1 | H  | 0.000 |
|                                         | H4   | 1.490078581  | 7.816444489  | 1.927207514  | dmol | 1 | H  | 0.000 |
|                                         | S5   | -0.146149352 | 7.654807230  | 0.062178868  | dmol | 1 | S  | 0.000 |
|                                         | C6   | 0.878601076  | -3.715965345 | -2.643161941 | dmol | 1 | C  | 0.000 |
|                                         | H7   | 1.869306066  | -3.285055851 | -2.564081629 | dmol | 1 | H  | 0.000 |
|                                         | N8   | -0.085679552 | -3.421246581 | -1.696605658 | dmol | 1 | N  | 0.000 |

|                                            |      |              |              |              |      |   |    |       |
|--------------------------------------------|------|--------------|--------------|--------------|------|---|----|-------|
|                                            | C9   | 0.350814601  | -4.559337831 | -3.595521493 | dmol | 1 | C  | 0.000 |
|                                            | H10  | 0.768062433  | -5.010921082 | -4.487441672 | dmol | 1 | H  | 0.000 |
|                                            | C11  | -1.189456819 | -4.064700275 | -2.048077597 | dmol | 1 | C  | 0.000 |
|                                            | H12  | -2.112305193 | -4.039496425 | -1.482764273 | dmol | 1 | H  | 0.000 |
|                                            | N13  | -0.973472676 | -4.779651506 | -3.201213746 | dmol | 1 | N  | 0.000 |
|                                            | H14  | -1.672680743 | -5.311571978 | -3.705397332 | dmol | 1 | H  | 0.000 |
|                                            | C15  | -0.933752555 | -4.581548849 | 1.656461031  | dmol | 1 | C  | 0.000 |
|                                            | H16  | -1.364309247 | -5.571083947 | 1.389162472  | dmol | 1 | H  | 0.000 |
|                                            | H17  | -1.188949084 | -4.405530145 | 2.728321033  | dmol | 1 | H  | 0.000 |
|                                            | C18  | 0.610597548  | -4.713414716 | 1.604163672  | dmol | 1 | C  | 0.000 |
|                                            | O19  | 1.175350498  | -5.736624029 | 2.063062220  | dmol | 1 | O  | 0.000 |
|                                            | O20  | 1.213113237  | -3.685023602 | 1.076028772  | dmol | 1 | O  | 0.000 |
|                                            | O21  | -1.445805341 | -3.565021241 | 0.836143242  | dmol | 1 | O  | 0.000 |
|                                            | Fe22 | 0.004376309  | 5.303064610  | 0.245076185  | dmol | 1 | Fe | 0.000 |
|                                            | Fe23 | -1.432810008 | 3.057586837  | 0.884186289  | dmol | 1 | Fe | 0.000 |
|                                            | Fe24 | 1.289121507  | 2.914357247  | 0.971092563  | dmol | 1 | Fe | 0.000 |
|                                            | Fe25 | -0.031742411 | 2.960269111  | -1.439288939 | dmol | 1 | Fe | 0.000 |
|                                            | Fe26 | 0.003751536  | 0.295584876  | -1.368425441 | dmol | 1 | Fe | 0.000 |
|                                            | Fe27 | -1.487109730 | 0.465962567  | 0.752490227  | dmol | 1 | Fe | 0.000 |
|                                            | Fe28 | 1.176586035  | 0.345697675  | 1.033469038  | dmol | 1 | Fe | 0.000 |
|                                            | Mo29 | -0.086719943 | -2.057794835 | 0.246775455  | dmol | 1 | Mo | 0.000 |
|                                            | S30  | -1.849793104 | 4.364780472  | -0.913833332 | dmol | 1 | S  | 0.000 |
|                                            | S31  | -0.078017712 | 4.315683600  | 2.307314421  | dmol | 1 | S  | 0.000 |
|                                            | S32  | 0.080065865  | 1.587831870  | -3.216170641 | dmol | 1 | S  | 0.000 |
|                                            | S33  | 1.849691495  | 4.254252616  | -0.816916162 | dmol | 1 | S  | 0.000 |
|                                            | S34  | -1.941792286 | -0.917430894 | -0.958530522 | dmol | 1 | S  | 0.000 |
|                                            | S35  | -3.087890017 | 1.677093004  | 1.993327061  | dmol | 1 | S  | 0.000 |
|                                            | S36  | -0.024082273 | -1.065749577 | 2.597517524  | dmol | 1 | S  | 0.000 |
|                                            | S37  | 1.865894846  | -0.967537859 | -0.723894978 | dmol | 1 | S  | 0.000 |
|                                            | S38  | 2.828149051  | 1.580784859  | 1.927833585  | dmol | 1 | S  | 0.000 |
|                                            | N39  | -0.116647504 | 1.710604590  | 0.116834976  | dmol | 1 | N  | 0.000 |
|                                            | H40  | 1.105040999  | -1.698638206 | 3.049784781  | dmol | 1 | H  | 0.000 |
|                                            | H41  | -2.546190132 | 1.563413412  | 3.242549412  | dmol | 1 | H  | 0.000 |
| <b>2H-ab</b><br>s2bhs3bh5tc12<br>9_1a.cmmf | 41   |              |              |              |      |   |    |       |
|                                            | C1   | 1.419087685  | 8.133631525  | 0.885401665  | dmol | 1 | C  | 0.000 |
|                                            | H2   | 2.271496413  | 7.755122268  | 0.303796738  | dmol | 1 | H  | 0.000 |
|                                            | H3   | 1.456263723  | 9.235378954  | 0.903861971  | dmol | 1 | H  | 0.000 |
|                                            | H4   | 1.508560277  | 7.755181038  | 1.913340448  | dmol | 1 | H  | 0.000 |
|                                            | S5   | -0.198133935 | 7.603927287  | 0.110298527  | dmol | 1 | S  | 0.000 |
|                                            | C6   | 0.892934846  | -3.752771328 | -2.635719077 | dmol | 1 | C  | 0.000 |
|                                            | H7   | 1.896860391  | -3.355767273 | -2.546586650 | dmol | 1 | H  | 0.000 |
|                                            | N8   | -0.069432192 | -3.425454714 | -1.696687447 | dmol | 1 | N  | 0.000 |
|                                            | C9   | 0.344923848  | -4.574009523 | -3.595252678 | dmol | 1 | C  | 0.000 |
|                                            | H10  | 0.892934846  | -5.033901772 | -4.486106202 | dmol | 1 | H  | 0.000 |
|                                            | C11  | -1.191253192 | -4.030881502 | -2.059407095 | dmol | 1 | C  | 0.000 |
|                                            | H12  | -2.121862406 | -3.969914576 | -1.509552300 | dmol | 1 | H  | 0.000 |
|                                            | N13  | -0.990003737 | -4.749373117 | -3.214318959 | dmol | 1 | N  | 0.000 |
|                                            | H14  | -1.702734167 | -5.251288249 | -3.730538672 | dmol | 1 | H  | 0.000 |
|                                            | C15  | -0.901198001 | -4.536043360 | 1.657870256  | dmol | 1 | C  | 0.000 |
|                                            | H16  | -1.364251712 | -5.507585619 | 1.376706938  | dmol | 1 | H  | 0.000 |
|                                            | H17  | -1.118395759 | -4.398970150 | 2.744842454  | dmol | 1 | H  | 0.000 |
|                                            | C18  | 0.635044190  | -4.707850974 | 1.551888530  | dmol | 1 | C  | 0.000 |
|                                            | O19  | 1.185325120  | -5.755534111 | 1.970755573  | dmol | 1 | O  | 0.000 |
|                                            | O20  | 1.248567630  | -3.685949290 | 1.024293663  | dmol | 1 | O  | 0.000 |
|                                            | O21  | -1.415649297 | -3.481596254 | 0.891034432  | dmol | 1 | O  | 0.000 |
|                                            | Fe22 | -0.040814271 | 5.252579499  | 0.261171128  | dmol | 1 | Fe | 0.000 |
|                                            | Fe23 | -1.372618531 | 2.936671849  | 0.895099836  | dmol | 1 | Fe | 0.000 |
|                                            | Fe24 | 1.339075060  | 2.926050184  | 0.963248306  | dmol | 1 | Fe | 0.000 |
|                                            | Fe25 | -0.042717613 | 2.947440888  | -1.408840248 | dmol | 1 | Fe | 0.000 |
|                                            | Fe26 | 0.074296516  | 0.320503729  | -1.314659191 | dmol | 1 | Fe | 0.000 |
|                                            | Fe27 | -1.366534248 | 0.394820245  | 0.912752999  | dmol | 1 | Fe | 0.000 |
|                                            | Fe28 | 1.533922081  | 0.316249257  | 0.963293092  | dmol | 1 | Fe | 0.000 |
|                                            | Mo29 | -0.016341821 | -2.017208804 | 0.221143037  | dmol | 1 | Mo | 0.000 |
|                                            | S30  | -1.897317294 | 4.273475510  | -0.851629728 | dmol | 1 | S  | 0.000 |
|                                            | S31  | -0.078040408 | 4.239533319  | 2.306719115  | dmol | 1 | S  | 0.000 |
|                                            | S32  | 0.090755223  | 1.578092364  | -3.174009464 | dmol | 1 | S  | 0.000 |
|                                            | S33  | 1.802526071  | 4.281352850  | -0.834676875 | dmol | 1 | S  | 0.000 |
|                                            | S34  | -1.879312733 | -0.874172567 | -0.872016168 | dmol | 1 | S  | 0.000 |
|                                            | S35  | -3.097162207 | 1.669068152  | 1.910889339  | dmol | 1 | S  | 0.000 |
|                                            | S36  | 0.015968141  | -0.804143090 | 2.438240530  | dmol | 1 | S  | 0.000 |
|                                            | S37  | 1.942013272  | -1.026202847 | -0.836164501 | dmol | 1 | S  | 0.000 |
|                                            | S38  | 3.081505654  | 1.746195431  | 1.785199877  | dmol | 1 | S  | 0.000 |
|                                            | N39  | -0.007394918 | 1.727843653  | 0.197298937  | dmol | 1 | N  | 0.000 |
|                                            | H40  | 0.116648987  | -1.851266497 | 3.346657869  | dmol | 1 | H  | 0.000 |
|                                            | H41  | -2.740298242 | 1.696767614  | 3.230359995  | dmol | 1 | H  | 0.000 |



|                                                          |              |              |              |              |      |   |       |       |
|----------------------------------------------------------|--------------|--------------|--------------|--------------|------|---|-------|-------|
| <b>2H-b</b><br>s2bhs3bh5tdd<br>129_3a.cmmf               | 41           |              |              |              |      |   |       |       |
|                                                          | C1           | 1.556467818  | 8.097438596  | 1.022531912  | dmol | 1 | C     | 0.000 |
|                                                          | H2           | 2.402091251  | 7.696118736  | 0.448177897  | dmol | 1 | H     | 0.000 |
|                                                          | H3           | 1.634095121  | 9.196902511  | 1.051891699  | dmol | 1 | H     | 0.000 |
|                                                          | H4           | 1.617983016  | 7.709747792  | 2.048366102  | dmol | 1 | H     | 0.000 |
|                                                          | S5           | -0.063527127 | 7.613895219  | 0.220796922  | dmol | 1 | S     | 0.000 |
|                                                          | C6           | 0.856156577  | -3.711164942 | -2.700919604 | dmol | 1 | C     | 0.000 |
|                                                          | H7           | 1.863391115  | -3.325311685 | -2.603718705 | dmol | 1 | H     | 0.000 |
|                                                          | N8           | -0.106128254 | -3.385700945 | -1.761733450 | dmol | 1 | N     | 0.000 |
|                                                          | C9           | 0.303152305  | -4.518640774 | -3.669192995 | dmol | 1 | C     | 0.000 |
|                                                          | H10          | 0.712363683  | -4.976717297 | -4.561100866 | dmol | 1 | H     | 0.000 |
|                                                          | C11          | -1.234543185 | -3.974248229 | -2.135192243 | dmol | 1 | C     | 0.000 |
|                                                          | H12          | -2.164304182 | -3.911401387 | -1.585037677 | dmol | 1 | H     | 0.000 |
|                                                          | N13          | -1.035253566 | -4.681993047 | -3.295807599 | dmol | 1 | N     | 0.000 |
|                                                          | H14          | -1.747189118 | -5.191244108 | -3.804694568 | dmol | 1 | H     | 0.000 |
|                                                          | C15          | -0.948782998 | -4.626736237 | 1.583426212  | dmol | 1 | C     | 0.000 |
|                                                          | H16          | -1.455800797 | -5.580160874 | 1.325756781  | dmol | 1 | H     | 0.000 |
|                                                          | H17          | -1.143427603 | -4.452519318 | 2.666825342  | dmol | 1 | H     | 0.000 |
|                                                          | C18          | 0.577287031  | -4.849482567 | 1.450105104  | dmol | 1 | C     | 0.000 |
|                                                          | O19          | 1.096948850  | -5.923443971 | 1.840760287  | dmol | 1 | O     | 0.000 |
|                                                          | O20          | 1.215157789  | -3.839360370 | 0.929317963  | dmol | 1 | O     | 0.000 |
|                                                          | O21          | -1.438569458 | -3.567415957 | 0.803465241  | dmol | 1 | O     | 0.000 |
|                                                          | Fe22         | 0.063148555  | 5.262235560  | 0.345689107  | dmol | 1 | Fe    | 0.000 |
|                                                          | Fe23         | -1.331721846 | 2.992185374  | 0.958245675  | dmol | 1 | Fe    | 0.000 |
|                                                          | Fe24         | 1.396997511  | 2.863157139  | 0.997678307  | dmol | 1 | Fe    | 0.000 |
|                                                          | Fe25         | 0.025835208  | 2.932915130  | -1.381027992 | dmol | 1 | Fe    | 0.000 |
|                                                          | Fe26         | 0.075341807  | 0.273133250  | -1.330990164 | dmol | 1 | Fe    | 0.000 |
|                                                          | Fe27         | -1.318225559 | 0.408798956  | 0.888367177  | dmol | 1 | Fe    | 0.000 |
|                                                          | Fe28         | 1.363963879  | 0.283485098  | 1.014717198  | dmol | 1 | Fe    | 0.000 |
|                                                          | Mo29         | -0.023135183 | -2.122832478 | 0.197070689  | dmol | 1 | Mo    | 0.000 |
|                                                          | S30          | -1.798808968 | 4.322840791  | -0.807487024 | dmol | 1 | S     | 0.000 |
|                                                          | S31          | 0.034365318  | 4.235435108  | 2.383668229  | dmol | 1 | S     | 0.000 |
|                                                          | S32          | 0.136752030  | 1.572655348  | -3.171135260 | dmol | 1 | S     | 0.000 |
|                                                          | S33          | 1.894644598  | 4.238091928  | -0.774422115 | dmol | 1 | S     | 0.000 |
|                                                          | S34          | -1.890091681 | -0.885113564 | -0.871020585 | dmol | 1 | S     | 0.000 |
|                                                          | S35          | -2.938646686 | 1.637089192  | 2.135893532  | dmol | 1 | S     | 0.000 |
|                                                          | S36          | 0.219513442  | -1.162175202 | 2.583373659  | dmol | 1 | S     | 0.000 |
|                                                          | S37          | 1.940232189  | -1.039330475 | -0.778725594 | dmol | 1 | S     | 0.000 |
|                                                          | S38          | 3.007400765  | 1.559614956  | 1.879483870  | dmol | 1 | S     | 0.000 |
|                                                          | N39          | -0.008429412 | 1.681651409  | 0.170156009  | dmol | 1 | N     | 0.000 |
|                                                          | H40          | -0.955290543 | -0.516655299 | 2.907033342  | dmol | 1 | H     | 0.000 |
| H41                                                      | -2.391413217 | 1.664256633  | 3.385738183  | dmol         | 1    | H | 0.000 |       |
| <b>2H-bc</b><br>s2bhs3bh3tffb<br>129_1_3985.0<br>0a.cmmf | 41           |              |              |              |      |   |       |       |
|                                                          | C1           | 1.421130263  | 8.028063497  | 0.877104929  | dmol | 1 | C     | 0.000 |
|                                                          | H2           | 2.211227035  | 7.608176893  | 0.240010423  | dmol | 1 | H     | 0.000 |
|                                                          | H3           | 1.497724561  | 9.127721682  | 0.877459379  | dmol | 1 | H     | 0.000 |
|                                                          | H4           | 1.569835743  | 7.654866294  | 1.900659345  | dmol | 1 | H     | 0.000 |
|                                                          | S5           | -0.261743942 | 7.541682473  | 0.216038890  | dmol | 1 | S     | 0.000 |
|                                                          | C6           | 0.919260466  | -3.784549254 | -2.587153922 | dmol | 1 | C     | 0.000 |
|                                                          | H7           | 1.926761838  | -3.418491567 | -2.433962126 | dmol | 1 | H     | 0.000 |
|                                                          | N8           | -0.087674194 | -3.431257329 | -1.708051329 | dmol | 1 | N     | 0.000 |
|                                                          | C9           | 0.405324244  | -4.583915423 | -3.583162350 | dmol | 1 | C     | 0.000 |
|                                                          | H10          | 0.852923544  | -5.051461130 | -4.451590924 | dmol | 1 | H     | 0.000 |
|                                                          | C11          | -1.202085921 | -4.000281812 | -2.139168718 | dmol | 1 | C     | 0.000 |
|                                                          | H12          | -2.164850900 | -3.913788313 | -1.652217316 | dmol | 1 | H     | 0.000 |
|                                                          | N13          | -0.954827473 | -4.718938534 | -3.284261132 | dmol | 1 | N     | 0.000 |
|                                                          | H14          | -1.650083410 | -5.195551052 | -3.846184876 | dmol | 1 | H     | 0.000 |
|                                                          | C15          | -0.856975923 | -4.575912214 | 1.692420767  | dmol | 1 | C     | 0.000 |
|                                                          | H16          | -1.351322125 | -5.549910765 | 1.488602111  | dmol | 1 | H     | 0.000 |
|                                                          | H17          | -1.017609249 | -4.363245041 | 2.776249387  | dmol | 1 | H     | 0.000 |
|                                                          | C18          | 0.669920403  | -4.770846086 | 1.518657175  | dmol | 1 | C     | 0.000 |
|                                                          | O19          | 1.225186709  | -5.825956399 | 1.909423524  | dmol | 1 | O     | 0.000 |
|                                                          | O20          | 1.273475397  | -3.754542531 | 0.966721919  | dmol | 1 | O     | 0.000 |
|                                                          | O21          | -1.392717026 | -3.556017956 | 0.890752090  | dmol | 1 | O     | 0.000 |
|                                                          | Fe22         | -0.024315559 | 5.202458544  | 0.288082383  | dmol | 1 | Fe    | 0.000 |
|                                                          | Fe23         | -1.247842525 | 2.919659354  | 0.984694332  | dmol | 1 | Fe    | 0.000 |
|                                                          | Fe24         | 1.384379107  | 2.914753028  | 1.025086028  | dmol | 1 | Fe    | 0.000 |
|                                                          | Fe25         | 0.030407157  | 2.935923287  | -1.400218721 | dmol | 1 | Fe    | 0.000 |
|                                                          | Fe26         | 0.004514966  | 0.266071095  | -1.290529793 | dmol | 1 | Fe    | 0.000 |
|                                                          | Fe27         | -1.229228466 | 0.268663618  | 1.066799274  | dmol | 1 | Fe    | 0.000 |
|                                                          | Fe28         | 1.445694542  | 0.346297579  | 0.956013631  | dmol | 1 | Fe    | 0.000 |
|                                                          | Mo29         | -0.026121600 | -2.066937838 | 0.263714025  | dmol | 1 | Mo    | 0.000 |
|                                                          | S30          | -1.859395101 | 4.190851767  | -0.781105269 | dmol | 1 | S     | 0.000 |
|                                                          | S31          | 0.023595340  | 4.209419340  | 2.394354027  | dmol | 1 | S     | 0.000 |
|                                                          | S32          | 0.017858634  | 1.520600996  | -3.153490538 | dmol | 1 | S     | 0.000 |
|                                                          | S33          | 1.869400347  | 4.249601577  | -0.780465498 | dmol | 1 | S     | 0.000 |
|                                                          | S34          | -1.922262641 | -0.904454011 | -0.721206225 | dmol | 1 | S     | 0.000 |
| S35                                                      | -3.017001227 | 1.571232433  | 1.787336300  | dmol         | 1    | S | 0.000 |       |

|                                             |      |              |              |              |      |   |    |       |
|---------------------------------------------|------|--------------|--------------|--------------|------|---|----|-------|
|                                             | S36  | 0.250078850  | -1.025642307 | 2.500350606  | dmol | 1 | S  | 0.000 |
|                                             | S37  | 1.896925888  | -1.003679187 | -0.836629626 | dmol | 1 | S  | 0.000 |
|                                             | S38  | 3.026272623  | 1.639948534  | 1.878871457  | dmol | 1 | S  | 0.000 |
|                                             | N39  | 0.015634779  | 1.602334312  | 0.267750860  | dmol | 1 | N  | 0.000 |
|                                             | H40  | -0.839901829 | -0.039161206 | 2.750990381  | dmol | 1 | H  | 0.000 |
|                                             | H41  | -2.831573326 | 1.736213790  | 3.131255117  | dmol | 1 | H  | 0.000 |
| <b>2H-c</b><br>s2bhs3bh3tg3<br>12as_1a.cmmf | 41   |              |              |              |      |   |    |       |
|                                             | C1   | 1.573225883  | 8.046132635  | 0.828406511  | dmol | 1 | C  | 0.000 |
|                                             | H2   | 2.406174580  | 7.640089684  | 0.236699463  | dmol | 1 | H  | 0.000 |
|                                             | H3   | 1.637166893  | 9.148301487  | 0.827515010  | dmol | 1 | H  | 0.000 |
|                                             | H4   | 1.668372608  | 7.685713234  | 1.862140664  | dmol | 1 | H  | 0.000 |
|                                             | S5   | -0.062430588 | 7.510088582  | 0.097041614  | dmol | 1 | S  | 0.000 |
|                                             | C6   | 0.832566145  | -3.814155625 | -2.683069513 | dmol | 1 | C  | 0.000 |
|                                             | H7   | 1.847984593  | -3.453297504 | -2.572505548 | dmol | 1 | H  | 0.000 |
|                                             | N8   | -0.135648114 | -3.448055377 | -1.767717658 | dmol | 1 | N  | 0.000 |
|                                             | C9   | 0.279409395  | -4.628220688 | -3.646744928 | dmol | 1 | C  | 0.000 |
|                                             | H10  | 0.692513605  | -5.116993372 | -4.521323894 | dmol | 1 | H  | 0.000 |
|                                             | C11  | -1.265863639 | -4.019531019 | -2.145984418 | dmol | 1 | C  | 0.000 |
|                                             | H12  | -2.206709398 | -3.931480101 | -1.617168343 | dmol | 1 | H  | 0.000 |
|                                             | N13  | -1.068440664 | -4.755396177 | -3.291632119 | dmol | 1 | N  | 0.000 |
|                                             | H14  | -1.782774549 | -5.253447146 | -3.810249486 | dmol | 1 | H  | 0.000 |
|                                             | C15  | -0.867967490 | -4.584478335 | 1.657510051  | dmol | 1 | C  | 0.000 |
|                                             | H16  | -1.405832946 | -5.539566877 | 1.476967328  | dmol | 1 | H  | 0.000 |
|                                             | H17  | -0.967392283 | -4.366018215 | 2.747146711  | dmol | 1 | H  | 0.000 |
|                                             | C18  | 0.639270610  | -4.833718294 | 1.406967022  | dmol | 1 | C  | 0.000 |
|                                             | O19  | 1.179064094  | -5.907359805 | 1.765445792  | dmol | 1 | O  | 0.000 |
|                                             | O20  | 1.250586772  | -3.837787487 | 0.823962928  | dmol | 1 | O  | 0.000 |
|                                             | O21  | -1.403810189 | -3.546279178 | 0.878869092  | dmol | 1 | O  | 0.000 |
|                                             | Fe22 | 0.067344335  | 5.169604422  | 0.358203157  | dmol | 1 | Fe | 0.000 |
|                                             | Fe23 | -1.258983303 | 2.873007605  | 1.059674465  | dmol | 1 | Fe | 0.000 |
|                                             | Fe24 | 1.377699377  | 2.844764330  | 1.121736677  | dmol | 1 | Fe | 0.000 |
|                                             | Fe25 | 0.095080689  | 2.899171288  | -1.306979587 | dmol | 1 | Fe | 0.000 |
|                                             | Fe26 | 0.084493751  | 0.267611582  | -1.239117457 | dmol | 1 | Fe | 0.000 |
|                                             | Fe27 | -1.174246921 | 0.255913861  | 1.386090978  | dmol | 1 | Fe | 0.000 |
|                                             | Fe28 | 1.423312965  | 0.280195306  | 1.015794268  | dmol | 1 | Fe | 0.000 |
|                                             | Mo29 | -0.004807912 | -2.064758915 | 0.298489908  | dmol | 1 | Mo | 0.000 |
|                                             | S30  | -1.776898446 | 4.204693883  | -0.716019039 | dmol | 1 | S  | 0.000 |
|                                             | S31  | 0.041428976  | 4.186320404  | 2.457131205  | dmol | 1 | S  | 0.000 |
|                                             | S32  | 0.108987902  | 1.526799304  | -3.085981917 | dmol | 1 | S  | 0.000 |
|                                             | S33  | 1.935776870  | 4.170789047  | -0.656238907 | dmol | 1 | S  | 0.000 |
|                                             | S34  | -1.844010861 | -0.826964969 | -0.627826139 | dmol | 1 | S  | 0.000 |
|                                             | S35  | -3.157616424 | 1.484332084  | 1.674237153  | dmol | 1 | S  | 0.000 |
|                                             | S36  | 0.236093584  | -1.110317600 | 2.464163719  | dmol | 1 | S  | 0.000 |
|                                             | S37  | 1.935655282  | -1.029176373 | -0.812111749 | dmol | 1 | S  | 0.000 |
|                                             | S38  | 2.958256522  | 1.549114672  | 2.025297203  | dmol | 1 | S  | 0.000 |
|                                             | N39  | 0.093948197  | 1.565975660  | 0.331676045  | dmol | 1 | N  | 0.000 |
|                                             | H40  | -0.896125243 | 0.983501508  | 2.696527803  | dmol | 1 | H  | 0.000 |
|                                             | H41  | -3.084854660 | 1.774882478  | 3.002705932  | dmol | 1 | H  | 0.000 |
| <b>2H-cd</b><br>s2hfeha9_2a.c<br>mmf        | 41   |              |              |              |      |   |    |       |
|                                             | C1   | 1.247907479  | 7.934020038  | 0.928662258  | dmol | 1 | C  | 0.000 |
|                                             | H2   | 2.080026304  | 7.564384770  | 0.312459447  | dmol | 1 | H  | 0.000 |
|                                             | H3   | 1.258847429  | 9.038862771  | 0.934155903  | dmol | 1 | H  | 0.000 |
|                                             | H4   | 1.388758026  | 7.568691573  | 1.956416552  | dmol | 1 | H  | 0.000 |
|                                             | S5   | -0.382710401 | 7.318508390  | 0.240787885  | dmol | 1 | S  | 0.000 |
|                                             | C6   | 1.080576366  | -3.687413578 | -2.652977891 | dmol | 1 | C  | 0.000 |
|                                             | H7   | 2.070323821  | -3.276797436 | -2.494173267 | dmol | 1 | H  | 0.000 |
|                                             | N8   | 0.062471017  | -3.406986337 | -1.762103255 | dmol | 1 | N  | 0.000 |
|                                             | C9   | 0.602673142  | -4.488221178 | -3.665686548 | dmol | 1 | C  | 0.000 |
|                                             | H10  | 1.071239911  | -4.917369042 | -4.542828732 | dmol | 1 | H  | 0.000 |
|                                             | C11  | -1.025158873 | -4.012352388 | -2.205887720 | dmol | 1 | C  | 0.000 |
|                                             | H12  | -1.989181484 | -3.981269417 | -1.712966346 | dmol | 1 | H  | 0.000 |
|                                             | N13  | -0.749028523 | -4.692830678 | -3.368534953 | dmol | 1 | N  | 0.000 |
|                                             | H14  | -1.418102747 | -5.205045199 | -3.930702331 | dmol | 1 | H  | 0.000 |
|                                             | C15  | -0.785790474 | -4.585643542 | 1.653798042  | dmol | 1 | C  | 0.000 |
|                                             | H16  | -1.283142716 | -5.563022832 | 1.491717676  | dmol | 1 | H  | 0.000 |
|                                             | H17  | -0.937568507 | -4.321457587 | 2.726093403  | dmol | 1 | H  | 0.000 |
|                                             | C18  | 0.738454144  | -4.780609375 | 1.474541059  | dmol | 1 | C  | 0.000 |
|                                             | O19  | 1.301555996  | -5.832807384 | 1.859950336  | dmol | 1 | O  | 0.000 |
|                                             | O20  | 1.337198790  | -3.761565778 | 0.921923833  | dmol | 1 | O  | 0.000 |
|                                             | O21  | -1.325403127 | -3.601759378 | 0.809479071  | dmol | 1 | O  | 0.000 |
|                                             | Fe22 | -0.148896612 | 5.063338834  | 0.418395743  | dmol | 1 | Fe | 0.000 |
|                                             | Fe23 | -1.332686040 | 2.589341969  | 1.187304321  | dmol | 1 | Fe | 0.000 |
|                                             | Fe24 | 1.496445858  | 2.882255383  | 1.129071024  | dmol | 1 | Fe | 0.000 |
|                                             | Fe25 | 0.148854433  | 2.940704256  | -1.242771780 | dmol | 1 | Fe | 0.000 |
|                                             | Fe26 | 0.100279762  | 0.340427238  | -1.185204450 | dmol | 1 | Fe | 0.000 |
|                                             | Fe27 | -1.379463030 | 0.180334429  | 1.219275696  | dmol | 1 | Fe | 0.000 |
|                                             | Fe28 | 1.436894721  | 0.277961057  | 1.127089452  | dmol | 1 | Fe | 0.000 |

|                                              |      |              |               |              |      |   |    |       |
|----------------------------------------------|------|--------------|---------------|--------------|------|---|----|-------|
|                                              | Mo29 | 0.020978908  | -2.057722952  | 0.299252300  | dmol | 1 | Mo | 0.000 |
|                                              | S30  | -1.838902159 | 3.986343801   | -0.623929413 | dmol | 1 | S  | 0.000 |
|                                              | S31  | -0.072433258 | 4.088418825   | 2.449969845  | dmol | 1 | S  | 0.000 |
|                                              | S32  | 0.142180093  | 1.600808092   | -3.044842950 | dmol | 1 | S  | 0.000 |
|                                              | S33  | 1.813903878  | 4.436931549   | -0.557628593 | dmol | 1 | S  | 0.000 |
|                                              | S34  | -1.809346664 | -0.897569477  | -0.762832904 | dmol | 1 | S  | 0.000 |
|                                              | S35  | -3.463599155 | 1.365796505   | 1.396973743  | dmol | 1 | S  | 0.000 |
|                                              | S36  | 0.058323049  | -1.053127438  | 2.471076089  | dmol | 1 | S  | 0.000 |
|                                              | S37  | 1.956573498  | -0.968121867  | -0.727869317 | dmol | 1 | S  | 0.000 |
|                                              | S38  | 3.025979807  | 1.544154411   | 2.074969646  | dmol | 1 | S  | 0.000 |
|                                              | N39  | 0.182375269  | 1.673898697   | 0.263638170  | dmol | 1 | N  | 0.000 |
|                                              | H40  | -3.529651816 | 1.380551203   | 2.758814854  | dmol | 1 | H  | 0.000 |
|                                              | H41  | -1.151755887 | 1.315959068   | 2.375124106  | dmol | 1 | H  | 0.000 |
| <b>2H-d</b><br>nrsvfehbshb9_<br>2a.cmmf      | 41   |              |               |              |      |   |    |       |
|                                              | C1   | 1.311857527  | 8.006659464   | 1.032666414  | dmol | 1 | C  | 0.000 |
|                                              | H2   | 2.117635360  | 7.632309033   | 0.387432340  | dmol | 1 | H  | 0.000 |
|                                              | H3   | 1.334322063  | 9.109317049   | 1.035353391  | dmol | 1 | H  | 0.000 |
|                                              | H4   | 1.480140941  | 7.641052568   | 2.053970008  | dmol | 1 | H  | 0.000 |
|                                              | S5   | -0.344670707 | 7.420994589   | 0.378586198  | dmol | 1 | S  | 0.000 |
|                                              | C6   | 1.183014968  | -3.778692060  | -2.620638060 | dmol | 1 | C  | 0.000 |
|                                              | H7   | 2.174529215  | -3.426128678  | -2.363374130 | dmol | 1 | H  | 0.000 |
|                                              | N8   | 0.104222075  | -3.464803982  | -1.815273472 | dmol | 1 | N  | 0.000 |
|                                              | C9   | 0.757379155  | -4.527435662  | -3.694703946 | dmol | 1 | C  | 0.000 |
|                                              | H10  | 1.278573831  | -4.958012189  | -4.540780941 | dmol | 1 | H  | 0.000 |
|                                              | C11  | -0.966938572 | -4.005242678  | -2.368621123 | dmol | 1 | C  | 0.000 |
|                                              | H12  | -1.969107263 | -3.936791994  | -1.964770352 | dmol | 1 | H  | 0.000 |
|                                              | N13  | -0.623518472 | -4.671381321  | -3.521667881 | dmol | 1 | N  | 0.000 |
|                                              | H14  | -1.266829592 | -5.117027563  | -4.164888003 | dmol | 1 | H  | 0.000 |
|                                              | C15  | -0.845771752 | -4.715718460  | 1.541348190  | dmol | 1 | C  | 0.000 |
|                                              | H16  | -1.310170538 | -5.701513749  | 1.330610878  | dmol | 1 | H  | 0.000 |
|                                              | H17  | -1.028221441 | -4.503374707  | 2.621219907  | dmol | 1 | H  | 0.000 |
|                                              | C18  | 0.685831905  | -4.865679623  | 1.397999931  | dmol | 1 | C  | 0.000 |
|                                              | O19  | 1.271563503  | -5.908722015  | 1.770594455  | dmol | 1 | O  | 0.000 |
|                                              | O20  | 1.274955257  | -3.8166630621 | 0.885778920  | dmol | 1 | O  | 0.000 |
|                                              | O21  | -1.389490351 | -3.711316027  | 0.724407567  | dmol | 1 | O  | 0.000 |
|                                              | Fe22 | -0.202817234 | 5.144465971   | 0.332609157  | dmol | 1 | Fe | 0.000 |
|                                              | Fe23 | -1.260129450 | 2.778975380   | 1.421599119  | dmol | 1 | Fe | 0.000 |
|                                              | Fe24 | 1.359057676  | 2.838919800   | 1.161490902  | dmol | 1 | Fe | 0.000 |
|                                              | Fe25 | -0.054475402 | 2.867254712   | -1.173248987 | dmol | 1 | Fe | 0.000 |
|                                              | Fe26 | 0.049982564  | 0.236676442   | -1.201781897 | dmol | 1 | Fe | 0.000 |
|                                              | Fe27 | -1.407942290 | 0.228640283   | 1.055411550  | dmol | 1 | Fe | 0.000 |
|                                              | Fe28 | 1.292474412  | 0.182879257   | 1.193135913  | dmol | 1 | Fe | 0.000 |
|                                              | Mo29 | -0.038004441 | -2.134628515  | 0.270512413  | dmol | 1 | Mo | 0.000 |
|                                              | S30  | -1.941951164 | 4.056499672   | -0.613799133 | dmol | 1 | S  | 0.000 |
|                                              | S31  | 0.037272846  | 4.338036963   | 2.414894693  | dmol | 1 | S  | 0.000 |
|                                              | S32  | 0.118984736  | 1.559223618   | -2.994679991 | dmol | 1 | S  | 0.000 |
|                                              | S33  | 1.680830926  | 4.315890247   | -0.644880448 | dmol | 1 | S  | 0.000 |
|                                              | S34  | -1.859884341 | -0.985728326  | -0.857348601 | dmol | 1 | S  | 0.000 |
|                                              | S35  | -3.317497516 | 1.623736115   | 1.578365116  | dmol | 1 | S  | 0.000 |
|                                              | S36  | -0.148269363 | -1.128800446  | 2.461752633  | dmol | 1 | S  | 0.000 |
|                                              | S37  | 1.913550638  | -1.020482591  | -0.667255193 | dmol | 1 | S  | 0.000 |
|                                              | S38  | 2.904570417  | 1.489097036   | 2.063442979  | dmol | 1 | S  | 0.000 |
|                                              | N39  | -0.030299861 | 1.547246377   | 0.427016978  | dmol | 1 | N  | 0.000 |
|                                              | H40  | -1.025293478 | 2.105488219   | 2.780294776  | dmol | 1 | H  | 0.000 |
|                                              | H41  | -3.299466784 | 1.254748410   | 2.887217726  | dmol | 1 | H  | 0.000 |
| <b>2H-de</b><br>s2bfe2henextc<br>94s_2a.cmmf | 41   |              |               |              |      |   |    |       |
|                                              | C1   | 1.553538967  | 8.060530579   | 1.293021977  | dmol | 1 | C  | 0.000 |
|                                              | H2   | 2.443910148  | 7.656887973   | 0.791500380  | dmol | 1 | H  | 0.000 |
|                                              | H3   | 1.580947902  | 9.162421596   | 1.243668917  | dmol | 1 | H  | 0.000 |
|                                              | H4   | 1.571411958  | 7.749524296   | 2.346776725  | dmol | 1 | H  | 0.000 |
|                                              | S5   | -0.004445589 | 7.453069143   | 0.446243538  | dmol | 1 | S  | 0.000 |
|                                              | C6   | 0.894507601  | -3.535914672  | -3.032056315 | dmol | 1 | C  | 0.000 |
|                                              | H7   | 1.758523478  | -2.882715869  | -3.069078853 | dmol | 1 | H  | 0.000 |
|                                              | N8   | 0.059745347  | -3.520610908  | -1.930113247 | dmol | 1 | N  | 0.000 |
|                                              | C9   | 0.424859219  | -4.441712203  | -3.957728155 | dmol | 1 | C  | 0.000 |
|                                              | H10  | 0.781429624  | -4.742725710  | -4.935935182 | dmol | 1 | H  | 0.000 |
|                                              | C11  | -0.908484925 | -4.391853174  | -2.160081276 | dmol | 1 | C  | 0.000 |
|                                              | H12  | -1.706882540 | -4.592355234  | -1.451739043 | dmol | 1 | H  | 0.000 |
|                                              | N13  | -0.730703424 | -4.986117545  | -3.387749243 | dmol | 1 | N  | 0.000 |
|                                              | H14  | -1.346248940 | -5.670610749  | -3.811274045 | dmol | 1 | H  | 0.000 |
|                                              | C15  | -0.812871908 | -4.725690509  | 1.473535638  | dmol | 1 | C  | 0.000 |
|                                              | H16  | -1.264543044 | -5.724438220  | 1.287587021  | dmol | 1 | H  | 0.000 |
|                                              | H17  | -1.010682074 | -4.485210594  | 2.545163788  | dmol | 1 | H  | 0.000 |
|                                              | C18  | 0.723182651  | -4.868106527  | 1.342934046  | dmol | 1 | C  | 0.000 |
|                                              | O19  | 1.309603983  | -5.898984338  | 1.749720812  | dmol | 1 | O  | 0.000 |
|                                              | O20  | 1.304290349  | -3.831899012  | 0.798589064  | dmol | 1 | O  | 0.000 |
|                                              | O21  | -1.356661582 | -3.751509719  | 0.619797198  | dmol | 1 | O  | 0.000 |

|                                                           |      |              |              |              |      |   |    |       |
|-----------------------------------------------------------|------|--------------|--------------|--------------|------|---|----|-------|
|                                                           | Fe22 | 0.031209014  | 5.177341263  | 0.434727854  | dmol | 1 | Fe | 0.000 |
|                                                           | Fe23 | -1.317344703 | 2.909958199  | 1.537220123  | dmol | 1 | Fe | 0.000 |
|                                                           | Fe24 | 1.407828560  | 2.773791419  | 1.210449443  | dmol | 1 | Fe | 0.000 |
|                                                           | Fe25 | -0.052917239 | 2.932362406  | -1.102813129 | dmol | 1 | Fe | 0.000 |
|                                                           | Fe26 | 0.068901420  | 0.300208496  | -1.237560103 | dmol | 1 | Fe | 0.000 |
|                                                           | Fe27 | -1.370599932 | 0.194372315  | 0.958844072  | dmol | 1 | Fe | 0.000 |
|                                                           | Fe28 | 1.286997165  | 0.132477058  | 1.119888479  | dmol | 1 | Fe | 0.000 |
|                                                           | Mo29 | -0.007959303 | -2.153119902 | 0.153950316  | dmol | 1 | Mo | 0.000 |
|                                                           | S30  | -1.835958445 | 4.218213621  | -0.443924806 | dmol | 1 | S  | 0.000 |
|                                                           | S31  | 0.210245194  | 4.316200169  | 2.509233685  | dmol | 1 | S  | 0.000 |
|                                                           | S32  | 0.022017955  | 1.688359206  | -2.980151272 | dmol | 1 | S  | 0.000 |
|                                                           | S33  | 1.818413701  | 4.229409330  | -0.581835559 | dmol | 1 | S  | 0.000 |
|                                                           | S34  | -1.807339852 | -0.988899316 | -0.972041170 | dmol | 1 | S  | 0.000 |
|                                                           | S35  | -3.271323465 | 1.549586136  | 1.387001077  | dmol | 1 | S  | 0.000 |
|                                                           | S36  | -0.158054962 | -1.183928957 | 2.359195843  | dmol | 1 | S  | 0.000 |
|                                                           | S37  | 1.929593939  | -1.010207936 | -0.775918084 | dmol | 1 | S  | 0.000 |
|                                                           | S38  | 2.897807938  | 1.351174003  | 2.092728915  | dmol | 1 | S  | 0.000 |
|                                                           | N39  | -0.006677200 | 1.524109195  | 0.396897142  | dmol | 1 | N  | 0.000 |
|                                                           | H40  | -1.700365215 | 2.808608802  | 3.039323163  | dmol | 1 | H  | 0.000 |
|                                                           | H41  | -3.408901771 | 1.198005888  | 2.692000264  | dmol | 1 | H  | 0.000 |
| <b>2H-e</b><br>s2bfe2henextd<br>9_3a.cmmf                 | 41   |              |              |              |      |   |    |       |
|                                                           | C1   | 1.422084191  | 8.014866980  | 1.213248800  | dmol | 1 | C  | 0.000 |
|                                                           | H2   | 2.331940083  | 7.632637440  | 0.731445170  | dmol | 1 | H  | 0.000 |
|                                                           | H3   | 1.457802323  | 9.116227955  | 1.227318684  | dmol | 1 | H  | 0.000 |
|                                                           | H4   | 1.390365870  | 7.645443911  | 2.246543301  | dmol | 1 | H  | 0.000 |
|                                                           | S5   | -0.106272668 | 7.476388654  | 0.281671299  | dmol | 1 | S  | 0.000 |
|                                                           | C6   | 1.049621899  | -3.658139876 | -2.838292919 | dmol | 1 | C  | 0.000 |
|                                                           | H7   | 1.959160660  | -3.069419843 | -2.814292574 | dmol | 1 | H  | 0.000 |
|                                                           | N8   | 0.140566980  | -3.572081396 | -1.799956943 | dmol | 1 | N  | 0.000 |
|                                                           | C9   | 0.582408032  | -4.534058830 | -3.792451343 | dmol | 1 | C  | 0.000 |
|                                                           | H10  | 0.986374934  | -4.868920389 | -4.740683474 | dmol | 1 | H  | 0.000 |
|                                                           | C11  | -0.868784926 | -4.373165717 | -2.095987521 | dmol | 1 | C  | 0.000 |
|                                                           | H12  | -1.726721367 | -4.518028412 | -1.447362581 | dmol | 1 | H  | 0.000 |
|                                                           | N13  | -0.647132075 | -4.990662244 | -3.305093704 | dmol | 1 | N  | 0.000 |
|                                                           | H14  | -1.288322773 | -5.616035611 | -3.779817394 | dmol | 1 | H  | 0.000 |
|                                                           | C15  | -0.825843270 | -4.712036933 | 1.588057705  | dmol | 1 | C  | 0.000 |
|                                                           | H16  | -1.271698988 | -5.707297162 | 1.376044377  | dmol | 1 | H  | 0.000 |
|                                                           | H17  | -1.058258846 | -4.485255402 | 2.654847285  | dmol | 1 | H  | 0.000 |
|                                                           | C18  | 0.713236505  | -4.858887357 | 1.508850651  | dmol | 1 | C  | 0.000 |
|                                                           | O19  | 1.284586422  | -5.879988019 | 1.958731350  | dmol | 1 | O  | 0.000 |
|                                                           | O20  | 1.315960648  | -3.836822002 | 0.959742688  | dmol | 1 | O  | 0.000 |
|                                                           | O21  | -1.341634675 | -3.729829958 | 0.731177125  | dmol | 1 | O  | 0.000 |
|                                                           | Fe22 | 0.026931224  | 5.125889987  | 0.342229178  | dmol | 1 | Fe | 0.000 |
|                                                           | Fe23 | -1.486982428 | 2.964398051  | 1.348609988  | dmol | 1 | Fe | 0.000 |
|                                                           | Fe24 | 1.405707573  | 2.816117304  | 1.087063405  | dmol | 1 | Fe | 0.000 |
|                                                           | Fe25 | -0.019801070 | 2.836683911  | -1.223376667 | dmol | 1 | Fe | 0.000 |
|                                                           | Fe26 | 0.113658460  | 0.200502030  | -1.250124684 | dmol | 1 | Fe | 0.000 |
|                                                           | Fe27 | -1.308947188 | 0.221534008  | 0.986570319  | dmol | 1 | Fe | 0.000 |
|                                                           | Fe28 | 1.362367791  | 0.169576238  | 1.072096666  | dmol | 1 | Fe | 0.000 |
|                                                           | Mo29 | 0.043000519  | -2.168988761 | 0.240579054  | dmol | 1 | Mo | 0.000 |
|                                                           | S30  | -1.831567961 | 4.115209966  | -0.605774110 | dmol | 1 | S  | 0.000 |
|                                                           | S31  | 0.122056860  | 4.166323073  | 2.445586610  | dmol | 1 | S  | 0.000 |
|                                                           | S32  | 0.060380505  | 1.530596109  | -3.057965010 | dmol | 1 | S  | 0.000 |
|                                                           | S33  | 1.818281007  | 4.207382473  | -0.750509371 | dmol | 1 | S  | 0.000 |
|                                                           | S34  | -1.782286084 | -1.041420000 | -0.888895382 | dmol | 1 | S  | 0.000 |
|                                                           | S35  | -3.258944722 | 1.429671516  | 1.475384037  | dmol | 1 | S  | 0.000 |
|                                                           | S36  | -0.063854878 | -1.098379581 | 2.410784149  | dmol | 1 | S  | 0.000 |
|                                                           | S37  | 1.975661589  | -1.090086550 | -0.750938563 | dmol | 1 | S  | 0.000 |
|                                                           | S38  | 2.983229178  | 1.462317624  | 1.938292414  | dmol | 1 | S  | 0.000 |
|                                                           | N39  | 0.061745396  | 1.476225649  | 0.296122905  | dmol | 1 | N  | 0.000 |
|                                                           | H40  | -2.427659241 | 3.832882746  | 2.185946165  | dmol | 1 | H  | 0.000 |
|                                                           | H41  | -3.292415492 | 1.368628417  | 2.834578916  | dmol | 1 | H  | 0.000 |
| <b>Fig 3</b>                                              |      |              |              |              |      |   |    |       |
| <b>3H-c + N<sub>2</sub></b><br>fe6n2en13hvct<br>a_2a.cmmf | 44   |              |              |              |      |   |    |       |
|                                                           | C1   | 1.623569261  | 7.951495890  | 1.400876280  | dmol | 1 | C  | 0.000 |
|                                                           | H2   | 2.614398956  | 7.639682225  | 1.042074234  | dmol | 1 | H  | 0.000 |
|                                                           | H3   | 1.630050224  | 9.038598637  | 1.578466425  | dmol | 1 | H  | 0.000 |
|                                                           | H4   | 1.418154915  | 7.432828779  | 2.347328178  | dmol | 1 | H  | 0.000 |
|                                                           | S5   | 0.306991309  | 7.578236486  | 0.123692183  | dmol | 1 | S  | 0.000 |
|                                                           | C6   | 1.312181801  | -3.664295685 | -2.962536240 | dmol | 1 | C  | 0.000 |
|                                                           | H7   | 2.308498172  | -3.294006463 | -2.755691922 | dmol | 1 | H  | 0.000 |
|                                                           | N8   | 0.279295214  | -3.410171307 | -2.082854291 | dmol | 1 | N  | 0.000 |
|                                                           | C9   | 0.841173084  | -4.392069110 | -4.033048497 | dmol | 1 | C  | 0.000 |
|                                                           | H10  | 1.322171425  | -4.790033715 | -4.917842778 | dmol | 1 | H  | 0.000 |
|                                                           | C11  | -0.811530229 | -3.960859736 | -2.588986050 | dmol | 1 | C  | 0.000 |

|                                                                                    |           |              |              |              |      |   |       |       |
|------------------------------------------------------------------------------------|-----------|--------------|--------------|--------------|------|---|-------|-------|
|                                                                                    | H12       | -1.791221285 | -3.917272253 | -2.131238607 | dmol | 1 | H     | 0.000 |
|                                                                                    | N13       | -0.522079282 | -4.579877642 | -3.779927430 | dmol | 1 | N     | 0.000 |
|                                                                                    | H14       | -1.193283697 | -5.031712436 | -4.389538042 | dmol | 1 | H     | 0.000 |
|                                                                                    | C15       | -0.302727879 | -4.971848732 | 1.141119935  | dmol | 1 | C     | 0.000 |
|                                                                                    | H16       | -0.719959983 | -5.945293610 | 0.814009184  | dmol | 1 | H     | 0.000 |
|                                                                                    | H17       | -0.450037307 | -4.912898380 | 2.244960589  | dmol | 1 | H     | 0.000 |
|                                                                                    | C18       | 1.226489072  | -4.987050102 | 0.907715957  | dmol | 1 | C     | 0.000 |
|                                                                                    | O19       | 1.888370611  | -6.037223380 | 1.095370022  | dmol | 1 | O     | 0.000 |
|                                                                                    | O20       | 1.705051553  | -3.834831678 | 0.532383003  | dmol | 1 | O     | 0.000 |
|                                                                                    | O21       | -0.957271385 | -3.913730972 | 0.487050218  | dmol | 1 | O     | 0.000 |
|                                                                                    | Fe22      | 0.303187323  | 5.239726920  | 0.206830818  | dmol | 1 | Fe    | 0.000 |
|                                                                                    | Fe23      | -1.384855958 | 3.092145194  | 0.768469342  | dmol | 1 | Fe    | 0.000 |
|                                                                                    | Fe24      | 1.445927424  | 2.867409563  | 1.053824096  | dmol | 1 | Fe    | 0.000 |
|                                                                                    | Fe25      | 0.294725725  | 2.850211674  | -1.379697660 | dmol | 1 | Fe    | 0.000 |
|                                                                                    | Fe26      | 0.064985130  | 0.252347104  | -1.253870811 | dmol | 1 | Fe    | 0.000 |
|                                                                                    | Fe27      | -1.622813251 | -0.465913358 | 1.034456688  | dmol | 1 | Fe    | 0.000 |
|                                                                                    | Fe28      | 1.319259888  | 0.280307800  | 1.0463267881 | dmol | 1 | Fe    | 0.000 |
|                                                                                    | Mo29      | 0.179735926  | -2.230445191 | 0.046950523  | dmol | 1 | Mo    | 0.000 |
|                                                                                    | S30       | -1.463087816 | 4.380134224  | -1.060122943 | dmol | 1 | S     | 0.000 |
|                                                                                    | S31       | 0.019803109  | 4.270752335  | 2.240745239  | dmol | 1 | S     | 0.000 |
|                                                                                    | S32       | 0.172299426  | 1.484437536  | -3.143583408 | dmol | 1 | S     | 0.000 |
|                                                                                    | S33       | 2.165829344  | 4.135449558  | -0.715033404 | dmol | 1 | S     | 0.000 |
|                                                                                    | S34       | -1.732353308 | -1.201748454 | -1.053217497 | dmol | 1 | S     | 0.000 |
|                                                                                    | S35       | -3.013135123 | 1.398930192  | 0.846650089  | dmol | 1 | S     | 0.000 |
|                                                                                    | S36       | 0.072277496  | -1.282971157 | 2.285791588  | dmol | 1 | S     | 0.000 |
|                                                                                    | S37       | 2.008483830  | -0.896606083 | -0.826008508 | dmol | 1 | S     | 0.000 |
|                                                                                    | S38       | 2.833721103  | 1.495908540  | 2.161939981  | dmol | 1 | S     | 0.000 |
|                                                                                    | N39       | 0.127472405  | 1.699523130  | 0.180914306  | dmol | 1 | N     | 0.000 |
|                                                                                    | N40       | -1.939853978 | 0.602283026  | 4.068331584  | dmol | 1 | N     | 0.000 |
|                                                                                    | N41       | -2.707654012 | -0.154049256 | 4.338538873  | dmol | 1 | N     | 0.000 |
|                                                                                    | H42       | -3.669600507 | 1.687333819  | 2.005417832  | dmol | 1 | H     | 0.000 |
|                                                                                    | H43       | -2.486999306 | 3.890289974  | 1.472903597  | dmol | 1 | H     | 0.000 |
|                                                                                    | H44       | -2.715639755 | -1.393123910 | 1.600119444  | dmol | 1 | H     | 0.000 |
| TS: 3H-c +<br>N <sub>2</sub> → 3HN <sub>2</sub> -a<br>fe6n2en13hvct<br>c_orig.cmmf | 44        |              |              |              |      |   |       |       |
|                                                                                    | C1        | 1.476959     | 6.237320     | 1.141266     | dmol | 1 | C     | 0.000 |
|                                                                                    | H2        | 2.448608     | 5.932480     | 0.728317     | dmol | 1 | H     | 0.000 |
|                                                                                    | H3        | 1.497330     | 7.320175     | 1.343536     | dmol | 1 | H     | 0.000 |
|                                                                                    | H4        | 1.314835     | 5.699249     | 2.085144     | dmol | 1 | H     | 0.000 |
|                                                                                    | S5        | 0.099640     | 5.883484     | -0.076233    | dmol | 1 | S     | 0.000 |
|                                                                                    | C6        | 1.071228     | -5.363617    | -3.126144    | dmol | 1 | C     | 0.000 |
|                                                                                    | H7        | 2.074493     | -4.999924    | -2.941040    | dmol | 1 | H     | 0.000 |
|                                                                                    | N8        | 0.051620     | -5.075912    | -2.239380    | dmol | 1 | N     | 0.000 |
|                                                                                    | C9        | 0.582642     | -6.122086    | -4.167068    | dmol | 1 | C     | 0.000 |
|                                                                                    | H10       | 1.050003     | -6.548431    | -5.046783    | dmol | 1 | H     | 0.000 |
|                                                                                    | C11       | -1.046555    | -5.637985    | -2.712600    | dmol | 1 | C     | 0.000 |
|                                                                                    | H12       | -2.016693    | -5.597641    | -2.233704    | dmol | 1 | H     | 0.000 |
|                                                                                    | N13       | -0.778214    | -6.293625    | -3.891556    | dmol | 1 | N     | 0.000 |
|                                                                                    | H14       | -1.455826    | -6.768707    | -4.476639    | dmol | 1 | H     | 0.000 |
|                                                                                    | C15       | -0.423294    | -6.654938    | 1.038666     | dmol | 1 | C     | 0.000 |
|                                                                                    | H16       | -0.861420    | -7.635651    | 0.759079     | dmol | 1 | H     | 0.000 |
|                                                                                    | H17       | -0.501526    | -6.575700    | 2.149094     | dmol | 1 | H     | 0.000 |
|                                                                                    | C18       | 1.086945     | -6.692291    | 0.715912     | dmol | 1 | C     | 0.000 |
|                                                                                    | O19       | 1.767410     | -7.725266    | 0.907425     | dmol | 1 | O     | 0.000 |
|                                                                                    | O20       | 1.553619     | -5.556641    | 0.255127     | dmol | 1 | O     | 0.000 |
|                                                                                    | O21       | -1.095444    | -5.602905    | 0.403198     | dmol | 1 | O     | 0.000 |
|                                                                                    | Fe22      | 0.093811     | 3.536407     | -0.011276    | dmol | 1 | Fe    | 0.000 |
|                                                                                    | Fe23      | -1.556366    | 1.396317     | 0.608047     | dmol | 1 | Fe    | 0.000 |
|                                                                                    | Fe24      | 1.319809     | 1.195053     | 0.850571     | dmol | 1 | Fe    | 0.000 |
|                                                                                    | Fe25      | 0.068878     | 1.113831     | -1.535294    | dmol | 1 | Fe    | 0.000 |
|                                                                                    | Fe26      | -0.044952    | -1.433075    | -1.406052    | dmol | 1 | Fe    | 0.000 |
|                                                                                    | Fe27      | -1.801727    | -2.140594    | 1.328140     | dmol | 1 | Fe    | 0.000 |
|                                                                                    | Fe28      | 1.237473     | -1.432098    | 0.871414     | dmol | 1 | Fe    | 0.000 |
|                                                                                    | Mo29      | 0.093704     | -3.908768    | -0.011261    | dmol | 1 | Mo    | 0.000 |
|                                                                                    | S30       | -1.676910    | 2.643219     | -1.239563    | dmol | 1 | S     | 0.000 |
|                                                                                    | S31       | -0.120895    | 2.592911     | 2.043915     | dmol | 1 | S     | 0.000 |
|                                                                                    | S32       | -0.035950    | -0.267410    | -3.309906    | dmol | 1 | S     | 0.000 |
| S33                                                                                | 1.939545  | 2.447845     | -0.976166    | dmol         | 1    | S | 0.000 |       |
| S34                                                                                | -1.868103 | -2.798355    | -0.846603    | dmol         | 1    | S | 0.000 |       |
| S35                                                                                | -3.169525 | -0.325272    | 0.766068     | dmol         | 1    | S | 0.000 |       |
| S36                                                                                | 0.125687  | -3.037567    | 2.163376     | dmol         | 1    | S | 0.000 |       |
| S37                                                                                | 1.892456  | -2.601608    | -1.003220    | dmol         | 1    | S | 0.000 |       |
| S38                                                                                | 2.745880  | -0.145508    | 1.925858     | dmol         | 1    | S | 0.000 |       |
| N39                                                                                | 0.000000  | 0.000000     | 0.000000     | dmol         | 1    | N | 0.000 |       |
| N40                                                                                | -1.810272 | -1.090302    | 3.598267     | dmol         | 1    | N | 0.000 |       |
| N41                                                                                | -2.543350 | -1.936493    | 3.711777     | dmol         | 1    | N | 0.000 |       |
| H42                                                                                | -3.749405 | 0.010254     | 1.951263     | dmol         | 1    | H | 0.000 |       |
| H43                                                                                | -2.646469 | 2.233047     | 1.290787     | dmol         | 1    | H | 0.000 |       |
| H44                                                                                | -2.894623 | -3.166290    | 1.590546     | dmol         | 1    | H | 0.000 |       |

|                                                              |              |              |              |              |      |   |       |       |
|--------------------------------------------------------------|--------------|--------------|--------------|--------------|------|---|-------|-------|
| <b>3HN2-a</b><br>fe6n2en13hvct<br>b_2a.cmmf                  | 44           |              |              |              |      |   |       |       |
|                                                              | C1           | 1.627482369  | 7.977211201  | 1.304412617  | dmol | 1 | C     | 0.000 |
|                                                              | H2           | 2.606568716  | 7.657652087  | 0.921276080  | dmol | 1 | H     | 0.000 |
|                                                              | H3           | 1.649103614  | 9.065468065  | 1.478486737  | dmol | 1 | H     | 0.000 |
|                                                              | H4           | 1.441353428  | 7.465547757  | 2.258194048  | dmol | 1 | H     | 0.000 |
|                                                              | S5           | 0.277037058  | 7.588121030  | 0.067227600  | dmol | 1 | S     | 0.000 |
|                                                              | C6           | 1.218345105  | -3.654106897 | -2.965444281 | dmol | 1 | C     | 0.000 |
|                                                              | H7           | 2.218598221  | -3.277969939 | -2.789881081 | dmol | 1 | H     | 0.000 |
|                                                              | N8           | 0.204237809  | -3.390514995 | -2.063895649 | dmol | 1 | N     | 0.000 |
|                                                              | C9           | 0.729665978  | -4.407155425 | -4.010059716 | dmol | 1 | C     | 0.000 |
|                                                              | H10          | 1.192317312  | -4.814883937 | -4.900818363 | dmol | 1 | H     | 0.000 |
|                                                              | C11          | -0.890065527 | -3.963095654 | -2.532653467 | dmol | 1 | C     | 0.000 |
|                                                              | H12          | -1.856891560 | -3.941199408 | -2.045012567 | dmol | 1 | H     | 0.000 |
|                                                              | N13          | -0.625131714 | -4.602824240 | -3.721905042 | dmol | 1 | N     | 0.000 |
|                                                              | H14          | -1.303466470 | -5.074102181 | -4.309372649 | dmol | 1 | H     | 0.000 |
|                                                              | C15          | -0.259763096 | -4.958303933 | 1.202458068  | dmol | 1 | C     | 0.000 |
|                                                              | H16          | -0.680004023 | -5.933767833 | 0.879453476  | dmol | 1 | H     | 0.000 |
|                                                              | H17          | -0.341625736 | -4.934040091 | 2.314646464  | dmol | 1 | H     | 0.000 |
|                                                              | C18          | 1.250662422  | -4.962141556 | 0.883138753  | dmol | 1 | C     | 0.000 |
|                                                              | O19          | 1.951247011  | -5.982881666 | 1.060449248  | dmol | 1 | O     | 0.000 |
|                                                              | O20          | 1.700722121  | -3.812827386 | 0.439797589  | dmol | 1 | O     | 0.000 |
|                                                              | O21          | -0.946057492 | -3.890822110 | 0.612511999  | dmol | 1 | O     | 0.000 |
|                                                              | Fe22         | 0.278293896  | 5.234405517  | 0.171300732  | dmol | 1 | Fe    | 0.000 |
|                                                              | Fe23         | -1.396191451 | 3.082084404  | 0.778955324  | dmol | 1 | Fe    | 0.000 |
|                                                              | Fe24         | 1.494192295  | 2.882543396  | 0.994558546  | dmol | 1 | Fe    | 0.000 |
|                                                              | Fe25         | 0.238136131  | 2.820339776  | -1.364148362 | dmol | 1 | Fe    | 0.000 |
|                                                              | Fe26         | 0.054594537  | 0.278137948  | -1.249571008 | dmol | 1 | Fe    | 0.000 |
|                                                              | Fe27         | -1.694366886 | -0.438359992 | 1.577495377  | dmol | 1 | Fe    | 0.000 |
|                                                              | Fe28         | 1.365281964  | 0.272599139  | 1.035683763  | dmol | 1 | Fe    | 0.000 |
|                                                              | Mo29         | 0.231641054  | -2.187913543 | 0.182620520  | dmol | 1 | Mo    | 0.000 |
|                                                              | S30          | -1.491465949 | 4.349306195  | -1.058931818 | dmol | 1 | S     | 0.000 |
|                                                              | S31          | 0.073788424  | 4.259796096  | 2.212766328  | dmol | 1 | S     | 0.000 |
|                                                              | S32          | 0.060389673  | 1.468979004  | -3.146207300 | dmol | 1 | S     | 0.000 |
|                                                              | S33          | 2.113224602  | 4.141557070  | -0.822139758 | dmol | 1 | S     | 0.000 |
|                                                              | S34          | -1.742541670 | -1.100066653 | -0.624581380 | dmol | 1 | S     | 0.000 |
|                                                              | S35          | -3.048050054 | 1.378105468  | 0.897347528  | dmol | 1 | S     | 0.000 |
|                                                              | S36          | 0.291901994  | -1.325859355 | 2.355162381  | dmol | 1 | S     | 0.000 |
|                                                              | S37          | 2.002581663  | -0.878544582 | -0.856243924 | dmol | 1 | S     | 0.000 |
|                                                              | S38          | 2.878195962  | 1.535415916  | 2.109478177  | dmol | 1 | S     | 0.000 |
|                                                              | N39          | 0.148284755  | 1.697759651  | 0.164314071  | dmol | 1 | N     | 0.000 |
|                                                              | N40          | -1.711891611 | 0.536397314  | 3.565996607  | dmol | 1 | N     | 0.000 |
|                                                              | N41          | -2.449387502 | -0.321517791 | 3.702082233  | dmol | 1 | N     | 0.000 |
|                                                              | H42          | -3.633211852 | 1.763256114  | 2.061690404  | dmol | 1 | H     | 0.000 |
|                                                              | H43          | -2.471371527 | 3.895383071  | 1.517525308  | dmol | 1 | H     | 0.000 |
| H44                                                          | -2.756363994 | -1.497167048 | 1.711836064  | dmol         | 1    | H | 0.000 |       |
| <b>4H-b + N<sub>2</sub></b><br>fe6n2nhx2b2h<br>3btfu_2a.cmmf | 45           |              |              |              |      |   |       |       |
|                                                              | C1           | 1.857496542  | 7.878243975  | 1.018609813  | dmol | 1 | C     | 0.000 |
|                                                              | H2           | 2.778786733  | 7.518170369  | 0.539309995  | dmol | 1 | H     | 0.000 |
|                                                              | H3           | 1.927515898  | 8.968709372  | 1.166160553  | dmol | 1 | H     | 0.000 |
|                                                              | H4           | 1.760354446  | 7.390226383  | 1.997685564  | dmol | 1 | H     | 0.000 |
|                                                              | S5           | 0.367027605  | 7.516131651  | -0.049243702 | dmol | 1 | S     | 0.000 |
|                                                              | C6           | 0.978418772  | -3.632730618 | -3.015481563 | dmol | 1 | C     | 0.000 |
|                                                              | H7           | 1.989311249  | -3.271145277 | -2.882448416 | dmol | 1 | H     | 0.000 |
|                                                              | N8           | 0.011865977  | -3.342946040 | -2.072439182 | dmol | 1 | N     | 0.000 |
|                                                              | C9           | 0.426981436  | -4.389159147 | -4.024021285 | dmol | 1 | C     | 0.000 |
|                                                              | H10          | 0.841807211  | -4.815242995 | -4.928471985 | dmol | 1 | H     | 0.000 |
|                                                              | C11          | -1.117145625 | -3.904408764 | -2.478402443 | dmol | 1 | C     | 0.000 |
|                                                              | H12          | -2.063796076 | -3.845169890 | -1.957217640 | dmol | 1 | H     | 0.000 |
|                                                              | N13          | -0.915494222 | -4.558418698 | -3.668663055 | dmol | 1 | N     | 0.000 |
|                                                              | H14          | -1.625641726 | -5.043897427 | -4.203126444 | dmol | 1 | H     | 0.000 |
|                                                              | C15          | -0.177518666 | -4.965186444 | 1.216105950  | dmol | 1 | C     | 0.000 |
|                                                              | H16          | -0.713172272 | -5.912833188 | 1.008804563  | dmol | 1 | H     | 0.000 |
|                                                              | H17          | -0.092689313 | -4.879716435 | 2.324067167  | dmol | 1 | H     | 0.000 |
|                                                              | C18          | 1.268277482  | -5.096692987 | 0.684473594  | dmol | 1 | C     | 0.000 |
|                                                              | O19          | 1.893234349  | -6.177807728 | 0.801936662  | dmol | 1 | O     | 0.000 |
|                                                              | O20          | 1.736744135  | -4.004541397 | 0.142344063  | dmol | 1 | O     | 0.000 |
|                                                              | O21          | -0.877212449 | -3.878418118 | 0.674414837  | dmol | 1 | O     | 0.000 |
|                                                              | Fe22         | 0.220767412  | 5.180447958  | 0.029630811  | dmol | 1 | Fe    | 0.000 |
|                                                              | Fe23         | -1.650170351 | 3.338325400  | 0.834646371  | dmol | 1 | Fe    | 0.000 |
|                                                              | Fe24         | 1.218885215  | 2.738648008  | 1.013567904  | dmol | 1 | Fe    | 0.000 |
|                                                              | Fe25         | 0.107338000  | 2.811350736  | -1.412913891 | dmol | 1 | Fe    | 0.000 |
|                                                              | Fe26         | 0.099495463  | 0.191678633  | -1.355618967 | dmol | 1 | Fe    | 0.000 |
|                                                              | Fe27         | -1.587246300 | 0.343950838  | 0.762569688  | dmol | 1 | Fe    | 0.000 |
|                                                              | Fe28         | 1.294791847  | 0.122724849  | 1.061917369  | dmol | 1 | Fe    | 0.000 |
|                                                              | Mo29         | 0.298535925  | -2.276315101 | 0.004241651  | dmol | 1 | Mo    | 0.000 |
|                                                              | S30          | -1.541867249 | 4.402191541  | -1.191674893 | dmol | 1 | S     | 0.000 |
| S31                                                          | -0.056242100 | 4.271586622  | 2.154499717  | dmol         | 1    | S | 0.000 |       |

|                                                                                                 |              |              |              |              |      |   |       |       |
|-------------------------------------------------------------------------------------------------|--------------|--------------|--------------|--------------|------|---|-------|-------|
|                                                                                                 | S32          | 0.124773153  | 1.473106013  | -3.214514129 | dmol | 1 | S     | 0.000 |
|                                                                                                 | S33          | 2.014903664  | 4.024693453  | -0.766447384 | dmol | 1 | S     | 0.000 |
|                                                                                                 | S34          | -1.713520787 | -1.167737866 | -0.864112935 | dmol | 1 | S     | 0.000 |
|                                                                                                 | S35          | -3.379780438 | 1.754748531  | 0.776897854  | dmol | 1 | S     | 0.000 |
|                                                                                                 | S36          | 1.082306029  | -1.838975921 | 2.385770885  | dmol | 1 | S     | 0.000 |
|                                                                                                 | S37          | 2.071283333  | -0.879580311 | -0.880798576 | dmol | 1 | S     | 0.000 |
|                                                                                                 | S38          | 2.695880997  | 1.498487586  | 2.138743657  | dmol | 1 | S     | 0.000 |
|                                                                                                 | N39          | 0.013201662  | 1.382276715  | 0.175398465  | dmol | 1 | N     | 0.000 |
|                                                                                                 | N40          | -1.103347535 | 0.985979197  | 3.593181278  | dmol | 1 | N     | 0.000 |
|                                                                                                 | N41          | -1.683436415 | 0.215557043  | 4.152970351  | dmol | 1 | N     | 0.000 |
|                                                                                                 | H42          | -3.726469361 | 1.770513296  | 2.090955797  | dmol | 1 | H     | 0.000 |
|                                                                                                 | H43          | -0.039320734 | -1.567709173 | 3.105482897  | dmol | 1 | H     | 0.000 |
|                                                                                                 | H44          | -2.638427266 | 4.331220692  | 1.433939033  | dmol | 1 | H     | 0.000 |
|                                                                                                 | H45          | -2.377485649 | -0.660335335 | 1.677270002  | dmol | 1 | H     | 0.000 |
| TS: 4H-b +<br>N <sub>2</sub> → 4HN <sub>2</sub> -c<br>fe6n2nhx2b2h<br>3btgu_1_4296.<br>86a.cmmf | 45           |              |              |              |      |   |       |       |
|                                                                                                 | C1           | 1.875463008  | 7.897032010  | 1.024770776  | dmol | 1 | C     | 0.000 |
|                                                                                                 | H2           | 2.803046803  | 7.584514078  | 0.525412564  | dmol | 1 | H     | 0.000 |
|                                                                                                 | H3           | 1.904221738  | 8.987456937  | 1.184811609  | dmol | 1 | H     | 0.000 |
|                                                                                                 | H4           | 1.816248251  | 7.396285498  | 2.000013204  | dmol | 1 | H     | 0.000 |
|                                                                                                 | S5           | 0.382399769  | 7.486850194  | -0.020460656 | dmol | 1 | S     | 0.000 |
|                                                                                                 | C6           | 0.955861137  | -3.597895857 | -3.004461801 | dmol | 1 | C     | 0.000 |
|                                                                                                 | H7           | 1.972760199  | -3.247576931 | -2.882959092 | dmol | 1 | H     | 0.000 |
|                                                                                                 | N8           | -0.011784891 | -3.266296448 | -2.073025640 | dmol | 1 | N     | 0.000 |
|                                                                                                 | C9           | 0.399554061  | -4.383706423 | -3.987542403 | dmol | 1 | C     | 0.000 |
|                                                                                                 | H10          | 0.812138925  | -4.846213328 | -4.875449389 | dmol | 1 | H     | 0.000 |
|                                                                                                 | C11          | -1.142187107 | -3.835334137 | -2.461350382 | dmol | 1 | C     | 0.000 |
|                                                                                                 | H12          | -2.083243603 | -3.760709762 | -1.932862232 | dmol | 1 | H     | 0.000 |
|                                                                                                 | N13          | -0.945203988 | -4.529818028 | -3.629734002 | dmol | 1 | N     | 0.000 |
|                                                                                                 | H14          | -1.655044663 | -5.039757750 | -4.141258476 | dmol | 1 | H     | 0.000 |
|                                                                                                 | C15          | -0.145132451 | -4.930685150 | 1.222272067  | dmol | 1 | C     | 0.000 |
|                                                                                                 | H16          | -0.664780826 | -5.892120393 | 1.036503675  | dmol | 1 | H     | 0.000 |
|                                                                                                 | H17          | -0.043272591 | -4.826302925 | 2.326920568  | dmol | 1 | H     | 0.000 |
|                                                                                                 | C18          | 1.296349667  | -5.044202828 | 0.669861301  | dmol | 1 | C     | 0.000 |
|                                                                                                 | O19          | 1.934527142  | -6.120860448 | 0.773354567  | dmol | 1 | O     | 0.000 |
|                                                                                                 | O20          | 1.740865780  | -3.946272610 | 0.129105198  | dmol | 1 | O     | 0.000 |
|                                                                                                 | O21          | -0.870516076 | -3.859019032 | 0.678001838  | dmol | 1 | O     | 0.000 |
|                                                                                                 | Fe22         | 0.267480730  | 5.147255275  | 0.030652493  | dmol | 1 | Fe    | 0.000 |
|                                                                                                 | Fe23         | -1.482829755 | 3.128339127  | 0.803266069  | dmol | 1 | Fe    | 0.000 |
|                                                                                                 | Fe24         | 1.289219892  | 2.749708743  | 0.937487035  | dmol | 1 | Fe    | 0.000 |
|                                                                                                 | Fe25         | 0.073736859  | 2.785605517  | -1.412172515 | dmol | 1 | Fe    | 0.000 |
|                                                                                                 | Fe26         | 0.033313866  | 0.210432482  | -1.303457611 | dmol | 1 | Fe    | 0.000 |
|                                                                                                 | Fe27         | -1.587361335 | 0.178815192  | 1.145056415  | dmol | 1 | Fe    | 0.000 |
|                                                                                                 | Fe28         | 1.211433830  | 0.161333248  | 1.041227729  | dmol | 1 | Fe    | 0.000 |
|                                                                                                 | Mo29         | 0.268128258  | -2.226586894 | 0.023622772  | dmol | 1 | Mo    | 0.000 |
|                                                                                                 | S30          | -1.544429079 | 4.372360898  | -1.137234868 | dmol | 1 | S     | 0.000 |
|                                                                                                 | S31          | 0.043971970  | 4.254071090  | 2.143092488  | dmol | 1 | S     | 0.000 |
| S32                                                                                             | -0.072156910 | 1.452248282  | -3.180021127 | dmol         | 1    | S | 0.000 |       |
| S33                                                                                             | 2.006262302  | 3.983568333  | -0.883329758 | dmol         | 1    | S | 0.000 |       |
| S34                                                                                             | -1.760022872 | -1.063735272 | -0.709155366 | dmol         | 1    | S | 0.000 |       |
| S35                                                                                             | -3.281274747 | 1.661708172  | 0.866325645  | dmol         | 1    | S | 0.000 |       |
| S36                                                                                             | 1.161420364  | -1.765010211 | 2.366543928  | dmol         | 1    | S | 0.000 |       |
| S37                                                                                             | 2.030537360  | -0.874213904 | -0.874364445 | dmol         | 1    | S | 0.000 |       |
| S38                                                                                             | 2.702346456  | 1.489893415  | 2.077851441  | dmol         | 1    | S | 0.000 |       |
| N39                                                                                             | -0.006177640 | 1.482294940  | 0.202955382  | dmol         | 1    | N | 0.000 |       |
| N40                                                                                             | -1.311133801 | 1.024725749  | 3.389070234  | dmol         | 1    | N | 0.000 |       |
| N41                                                                                             | -1.703484659 | -0.016277247 | 3.565801714  | dmol         | 1    | N | 0.000 |       |
| H42                                                                                             | -3.708455480 | 1.960728001  | 2.126587610  | dmol         | 1    | H | 0.000 |       |
| H43                                                                                             | 0.075750215  | -1.556911708 | 3.162705637  | dmol         | 1    | H | 0.000 |       |
| H44                                                                                             | -2.472495427 | 4.127886286  | 1.390396708  | dmol         | 1    | H | 0.000 |       |
| H45                                                                                             | -2.566050681 | -0.893606183 | 1.665169238  | dmol         | 1    | H | 0.000 |       |
| 4HN <sub>2</sub> -c<br>fe6n2nhx2b2h<br>3btgu_2a.cmmf                                            | 45           |              |              |              |      |   |       |       |
|                                                                                                 | C1           | 1.855238459  | 7.881949705  | 0.998961136  | dmol | 1 | C     | 0.000 |
|                                                                                                 | H2           | 2.768549848  | 7.517916398  | 0.508240364  | dmol | 1 | H     | 0.000 |
|                                                                                                 | H3           | 1.935369456  | 8.972110148  | 1.145159242  | dmol | 1 | H     | 0.000 |
|                                                                                                 | H4           | 1.765123440  | 7.396553408  | 1.979272835  | dmol | 1 | H     | 0.000 |
|                                                                                                 | S5           | 0.347888328  | 7.512216315  | -0.045124865 | dmol | 1 | S     | 0.000 |
|                                                                                                 | C6           | 0.941236103  | -3.593100649 | -3.010863062 | dmol | 1 | C     | 0.000 |
|                                                                                                 | H7           | 1.955603203  | -3.234443935 | -2.892195742 | dmol | 1 | H     | 0.000 |
|                                                                                                 | N8           | -0.019276042 | -3.286631453 | -2.063443756 | dmol | 1 | N     | 0.000 |
|                                                                                                 | C9           | 0.382271877  | -4.365203958 | -4.003470933 | dmol | 1 | C     | 0.000 |
|                                                                                                 | H10          | 0.790265074  | -4.804809764 | -4.905516524 | dmol | 1 | H     | 0.000 |
|                                                                                                 | C11          | -1.148900749 | -3.857953456 | -2.451801958 | dmol | 1 | C     | 0.000 |
|                                                                                                 | H12          | -2.085962193 | -3.804958807 | -1.913592012 | dmol | 1 | H     | 0.000 |
|                                                                                                 | N13          | -0.957711750 | -4.529517270 | -3.635565733 | dmol | 1 | N     | 0.000 |
|                                                                                                 | H14          | -1.667294138 | -5.035346734 | -4.152050390 | dmol | 1 | H     | 0.000 |
|                                                                                                 | C15          | -0.170604452 | -4.965948101 | 1.224076867  | dmol | 1 | C     | 0.000 |
| H16                                                                                             | -0.704906851 | -5.916151619 | 1.014584556  | dmol         | 1    | H | 0.000 |       |

|                          |      |              |              |              |      |   |    |       |
|--------------------------|------|--------------|--------------|--------------|------|---|----|-------|
|                          | H17  | -0.067136754 | -4.894227396 | 2.331875944  | dmol | 1 | H  | 0.000 |
|                          | C18  | 1.270665339  | -5.095290091 | 0.670745013  | dmol | 1 | C  | 0.000 |
|                          | O19  | 1.895478080  | -6.179660047 | 0.774163774  | dmol | 1 | O  | 0.000 |
|                          | O20  | 1.727849875  | -4.002366107 | 0.129984918  | dmol | 1 | O  | 0.000 |
|                          | O21  | -0.873171126 | -3.865513564 | 0.704055412  | dmol | 1 | O  | 0.000 |
|                          | Fe22 | 0.198442217  | 5.176531648  | 0.061254286  | dmol | 1 | Fe | 0.000 |
|                          | Fe23 | -1.563898804 | 3.203133577  | 0.839490039  | dmol | 1 | Fe | 0.000 |
|                          | Fe24 | 1.264934381  | 2.791062048  | 0.998566799  | dmol | 1 | Fe | 0.000 |
|                          | Fe25 | 0.078295113  | 2.783858272  | -1.337676504 | dmol | 1 | Fe | 0.000 |
|                          | Fe26 | 0.120823929  | 0.202398152  | -1.263663171 | dmol | 1 | Fe | 0.000 |
|                          | Fe27 | -1.566252470 | 0.221516786  | 1.179387344  | dmol | 1 | Fe | 0.000 |
|                          | Fe28 | 1.230188507  | 0.158744752  | 1.068801813  | dmol | 1 | Fe | 0.000 |
|                          | Mo29 | 0.293086264  | -2.254193236 | 0.049206218  | dmol | 1 | Mo | 0.000 |
|                          | S30  | -1.567248103 | 4.345381921  | -1.139349970 | dmol | 1 | S  | 0.000 |
|                          | S31  | -0.033130199 | 4.292320335  | 2.176272636  | dmol | 1 | S  | 0.000 |
|                          | S32  | 0.073242603  | 1.465668717  | -3.126356706 | dmol | 1 | S  | 0.000 |
|                          | S33  | 1.965347285  | 4.038469271  | -0.814872378 | dmol | 1 | S  | 0.000 |
|                          | S34  | -1.712579508 | -1.037213903 | -0.698799627 | dmol | 1 | S  | 0.000 |
|                          | S35  | -3.295941460 | 1.671013590  | 0.878809519  | dmol | 1 | S  | 0.000 |
|                          | S36  | 1.180552671  | -1.778595075 | 2.388677217  | dmol | 1 | S  | 0.000 |
|                          | S37  | 2.091127513  | -0.929013392 | -0.837215925 | dmol | 1 | S  | 0.000 |
|                          | S38  | 2.715339740  | 1.528795006  | 2.083566063  | dmol | 1 | S  | 0.000 |
|                          | N39  | 0.010030909  | 1.495632750  | 0.219109112  | dmol | 1 | N  | 0.000 |
|                          | N40  | -0.941126193 | 0.973312725  | 3.110091306  | dmol | 1 | N  | 0.000 |
|                          | N41  | -1.673474001 | 0.158935450  | 3.442092317  | dmol | 1 | N  | 0.000 |
|                          | H42  | -3.747077223 | 1.918159731  | 2.144526082  | dmol | 1 | H  | 0.000 |
|                          | H43  | 0.068219925  | -1.618237083 | 3.159488949  | dmol | 1 | H  | 0.000 |
|                          | H44  | -2.576270268 | 4.197506220  | 1.398022170  | dmol | 1 | H  | 0.000 |
|                          | H45  | -2.553207856 | -0.854811284 | 1.613077273  | dmol | 1 | H  | 0.000 |
| <b>4HN<sub>2</sub>-a</b> | 45   |              |              |              |      |   |    |       |
| <b>fe6n2en13ha3</b>      | C1   | 1.599939949  | 7.984025124  | 1.067014805  | dmol | 1 | C  | 0.000 |
| <b>btgvv_3_4296.</b>     | H2   | 2.577269309  | 7.658817722  | 0.685701570  | dmol | 1 | H  | 0.000 |
| <b>16a.cmmf</b>          | H3   | 1.623695263  | 9.072090431  | 1.232941519  | dmol | 1 | H  | 0.000 |
|                          | H4   | 1.412143103  | 7.478301035  | 2.023389499  | dmol | 1 | H  | 0.000 |
|                          | S5   | 0.248443789  | 7.593901068  | -0.162172825 | dmol | 1 | S  | 0.000 |
|                          | C6   | 0.879497248  | -3.715337602 | -3.060917834 | dmol | 1 | C  | 0.000 |
|                          | H7   | 1.898045415  | -3.348316824 | -3.041129455 | dmol | 1 | H  | 0.000 |
|                          | N8   | 0.011620475  | -3.413083589 | -2.026725646 | dmol | 1 | N  | 0.000 |
|                          | C9   | 0.233365206  | -4.487900556 | -3.999878545 | dmol | 1 | C  | 0.000 |
|                          | H10  | 0.559103197  | -4.931282293 | -4.932299589 | dmol | 1 | H  | 0.000 |
|                          | C11  | -1.150825136 | -3.981920467 | -2.314947007 | dmol | 1 | C  | 0.000 |
|                          | H12  | -2.032998324 | -3.935974240 | -1.690659125 | dmol | 1 | H  | 0.000 |
|                          | N13  | -1.066411425 | -4.653421005 | -3.511053327 | dmol | 1 | N  | 0.000 |
|                          | H14  | -1.825126298 | -5.145008822 | -3.967915651 | dmol | 1 | H  | 0.000 |
|                          | C15  | -0.184213032 | -4.997813342 | 1.271900171  | dmol | 1 | C  | 0.000 |
|                          | H16  | -0.651469311 | -5.958654856 | 0.974305715  | dmol | 1 | H  | 0.000 |
|                          | H17  | -0.283829236 | -4.925598680 | 2.378726633  | dmol | 1 | H  | 0.000 |
|                          | C18  | 1.333225203  | -5.075620423 | 0.966559864  | dmol | 1 | C  | 0.000 |
|                          | O19  | 1.972767845  | -6.125941080 | 1.229684780  | dmol | 1 | O  | 0.000 |
|                          | O20  | 1.815394104  | -3.983532902 | 0.452246920  | dmol | 1 | O  | 0.000 |
|                          | O21  | -0.832570595 | -3.920605654 | 0.642526474  | dmol | 1 | O  | 0.000 |
|                          | Fe22 | 0.172521550  | 5.253520467  | -0.126238472 | dmol | 1 | Fe | 0.000 |
|                          | Fe23 | -1.523448844 | 3.275679570  | 0.749960831  | dmol | 1 | Fe | 0.000 |
|                          | Fe24 | 1.379944675  | 2.851990164  | 0.911766212  | dmol | 1 | Fe | 0.000 |
|                          | Fe25 | 0.190853492  | 2.779943285  | -1.442615305 | dmol | 1 | Fe | 0.000 |
|                          | Fe26 | 0.175070766  | 0.203278016  | -1.303667133 | dmol | 1 | Fe | 0.000 |
|                          | Fe27 | -1.511171285 | 0.176596420  | 1.185537194  | dmol | 1 | Fe | 0.000 |
|                          | Fe28 | 1.462279253  | 0.220615749  | 0.945276881  | dmol | 1 | Fe | 0.000 |
|                          | Mo29 | 0.334541531  | -2.297831582 | 0.058421046  | dmol | 1 | Mo | 0.000 |
|                          | S30  | -1.545294833 | 4.326199116  | -1.298532786 | dmol | 1 | S  | 0.000 |
|                          | S31  | -0.038086748 | 4.395686116  | 2.035570656  | dmol | 1 | S  | 0.000 |
|                          | S32  | 0.099667403  | 1.404955552  | -3.195789814 | dmol | 1 | S  | 0.000 |
|                          | S33  | 2.023772956  | 4.100793115  | -0.961602252 | dmol | 1 | S  | 0.000 |
|                          | S34  | -1.641351262 | -1.071525584 | -0.677087128 | dmol | 1 | S  | 0.000 |
|                          | S35  | -3.228184134 | 1.657041235  | 0.750482079  | dmol | 1 | S  | 0.000 |
|                          | S36  | 0.527409499  | -1.443329313 | 2.451477582  | dmol | 1 | S  | 0.000 |
|                          | S37  | 2.125499262  | -1.000034087 | -0.919599469 | dmol | 1 | S  | 0.000 |
|                          | S38  | 2.930364888  | 1.646040491  | 1.940657619  | dmol | 1 | S  | 0.000 |
|                          | N39  | 0.127595271  | 1.566213352  | 0.134822297  | dmol | 1 | N  | 0.000 |
|                          | N40  | -1.106745471 | 1.188508850  | 3.160203188  | dmol | 1 | N  | 0.000 |
|                          | N41  | -1.890826077 | 0.407259660  | 3.427773332  | dmol | 1 | N  | 0.000 |
|                          | H42  | -3.720739926 | 1.858343276  | 2.003930929  | dmol | 1 | H  | 0.000 |
|                          | H43  | -2.622491489 | 4.213934245  | 1.270250575  | dmol | 1 | H  | 0.000 |
|                          | H44  | -2.486175048 | -0.911643252 | 1.607111732  | dmol | 1 | H  | 0.000 |
|                          | H45  | 1.627919043  | -1.989350322 | 3.074175798  | dmol | 1 | H  | 0.000 |



|                                                                      |             |              |              |              |      |   |       |       |
|----------------------------------------------------------------------|-------------|--------------|--------------|--------------|------|---|-------|-------|
| <b>4HN<sub>2</sub>-b</b><br>fe6n2en13ha3<br>bthv_2_4287.4<br>7a.cmmf | 45          |              |              |              |      |   |       |       |
|                                                                      | C1          | 1.622937542  | 7.973550247  | 1.055329805  | dmol | 1 | C     | 0.000 |
|                                                                      | H2          | 2.600847633  | 7.646466812  | 0.676649504  | dmol | 1 | H     | 0.000 |
|                                                                      | H3          | 1.648903850  | 9.061711621  | 1.226062006  | dmol | 1 | H     | 0.000 |
|                                                                      | H4          | 1.429106758  | 7.463759364  | 2.007943731  | dmol | 1 | H     | 0.000 |
|                                                                      | S5          | 0.276120130  | 7.582319386  | -0.176769954 | dmol | 1 | S     | 0.000 |
|                                                                      | C6          | 0.905763044  | -3.726892428 | -3.064147647 | dmol | 1 | C     | 0.000 |
|                                                                      | H7          | 1.922964676  | -3.358649839 | -3.042151440 | dmol | 1 | H     | 0.000 |
|                                                                      | N8          | 0.033071982  | -3.426288033 | -2.032529719 | dmol | 1 | N     | 0.000 |
|                                                                      | C9          | 0.261427609  | -4.498585951 | -4.003786775 | dmol | 1 | C     | 0.000 |
|                                                                      | H10         | 0.590011269  | -4.936633549 | -4.937483586 | dmol | 1 | H     | 0.000 |
|                                                                      | C11         | -1.131135992 | -3.995618539 | -2.324377349 | dmol | 1 | C     | 0.000 |
|                                                                      | H12         | -2.014040679 | -3.950879643 | -1.701689987 | dmol | 1 | H     | 0.000 |
|                                                                      | N13         | -1.040013271 | -4.664843108 | -3.519454432 | dmol | 1 | N     | 0.000 |
|                                                                      | H14         | -1.798840750 | -5.153675838 | -3.978676081 | dmol | 1 | H     | 0.000 |
|                                                                      | C15         | -0.177607899 | -5.040643319 | 1.262831117  | dmol | 1 | C     | 0.000 |
|                                                                      | H16         | -0.622773833 | -6.021269726 | 0.993575649  | dmol | 1 | H     | 0.000 |
|                                                                      | H17         | -0.259975602 | -4.948240964 | 2.368888796  | dmol | 1 | H     | 0.000 |
|                                                                      | C18         | 1.337219481  | -5.099274179 | 0.938085296  | dmol | 1 | C     | 0.000 |
|                                                                      | O19         | 2.004465013  | -6.119983569 | 1.232512851  | dmol | 1 | O     | 0.000 |
|                                                                      | O20         | 1.795016337  | -4.022936594 | 0.369885008  | dmol | 1 | O     | 0.000 |
|                                                                      | O21         | -0.850114611 | -3.982006528 | 0.622911318  | dmol | 1 | O     | 0.000 |
|                                                                      | Fe22        | 0.186451405  | 5.235911945  | -0.126484857 | dmol | 1 | Fe    | 0.000 |
|                                                                      | Fe23        | -1.559722140 | 3.355001169  | 0.710146253  | dmol | 1 | Fe    | 0.000 |
|                                                                      | Fe24        | 1.414957699  | 2.867045162  | 0.907401339  | dmol | 1 | Fe    | 0.000 |
|                                                                      | Fe25        | 0.205108679  | 2.789795357  | -1.452293704 | dmol | 1 | Fe    | 0.000 |
|                                                                      | Fe26        | 0.189244832  | 0.196095275  | -1.302326393 | dmol | 1 | Fe    | 0.000 |
|                                                                      | Fe27        | -1.371079795 | 0.077012543  | 1.348087826  | dmol | 1 | Fe    | 0.000 |
|                                                                      | Fe28        | 1.609289868  | 0.324975328  | 0.886431465  | dmol | 1 | Fe    | 0.000 |
|                                                                      | Mo29        | 0.317403153  | -2.369750873 | -0.005885845 | dmol | 1 | Mo    | 0.000 |
|                                                                      | S30         | -1.536634484 | 4.351886640  | -1.299154906 | dmol | 1 | S     | 0.000 |
|                                                                      | S31         | -0.015289013 | 4.349019421  | 2.029922904  | dmol | 1 | S     | 0.000 |
|                                                                      | S32         | 0.106335359  | 1.380632599  | -3.193300447 | dmol | 1 | S     | 0.000 |
|                                                                      | S33         | 2.033773749  | 4.089902888  | -0.985177456 | dmol | 1 | S     | 0.000 |
|                                                                      | S34         | -1.616086892 | -1.077719298 | -0.663826732 | dmol | 1 | S     | 0.000 |
|                                                                      | S35         | -3.060665274 | 1.577508746  | 0.739232865  | dmol | 1 | S     | 0.000 |
|                                                                      | S36         | 0.685279384  | -1.329513848 | 2.262579725  | dmol | 1 | S     | 0.000 |
|                                                                      | S37         | 2.143721386  | -1.027919292 | -0.922416137 | dmol | 1 | S     | 0.000 |
|                                                                      | S38         | 3.049250054  | 1.675108219  | 1.905211592  | dmol | 1 | S     | 0.000 |
|                                                                      | N39         | 0.190176012  | 1.469457570  | 0.192960059  | dmol | 1 | N     | 0.000 |
|                                                                      | N40         | -1.086339389 | 1.191980032  | 3.165989726  | dmol | 1 | N     | 0.000 |
|                                                                      | N41         | -1.857228230 | 0.385029449  | 3.439840190  | dmol | 1 | N     | 0.000 |
|                                                                      | H42         | -3.658941097 | 1.806272251  | 1.940763899  | dmol | 1 | H     | 0.000 |
|                                                                      | H43         | -2.655766901 | 4.265337789  | 1.263866962  | dmol | 1 | H     | 0.000 |
|                                                                      | H44         | -2.394466372 | -0.997918808 | 1.671948253  | dmol | 1 | H     | 0.000 |
| H45                                                                  | 0.147873336 | -1.366533552 | 3.512877803  | dmol         | 1    | H | 0.000 |       |
| <b>4HN<sub>2</sub>-c</b><br>fe6n2en13ha3<br>bthv_3a.cmmf             | 45          |              |              |              |      |   |       |       |
|                                                                      | C1          | 1.653664302  | 7.998346942  | 1.057432579  | dmol | 1 | C     | 0.000 |
|                                                                      | H2          | 2.635951569  | 7.663961199  | 0.697911297  | dmol | 1 | H     | 0.000 |
|                                                                      | H3          | 1.687247220  | 9.086436030  | 1.229857604  | dmol | 1 | H     | 0.000 |
|                                                                      | H4          | 1.435952534  | 7.492592418  | 2.006748792  | dmol | 1 | H     | 0.000 |
|                                                                      | S5          | 0.331531039  | 7.614911988  | -0.205745701 | dmol | 1 | S     | 0.000 |
|                                                                      | C6          | 0.938539777  | -3.705999687 | -3.067888974 | dmol | 1 | C     | 0.000 |
|                                                                      | H7          | 1.954746217  | -3.333185146 | -3.051062937 | dmol | 1 | H     | 0.000 |
|                                                                      | N8          | 0.077320943  | -3.424624060 | -2.022328937 | dmol | 1 | N     | 0.000 |
|                                                                      | C9          | 0.288354960  | -4.468028436 | -4.012041039 | dmol | 1 | C     | 0.000 |
|                                                                      | H10         | 0.607667126  | -4.888799739 | -4.957721104 | dmol | 1 | H     | 0.000 |
|                                                                      | C11         | -1.083170866 | -3.998146628 | -2.305931648 | dmol | 1 | C     | 0.000 |
|                                                                      | H12         | -1.954394664 | -3.969441059 | -1.665530569 | dmol | 1 | H     | 0.000 |
|                                                                      | N13         | -1.006158262 | -4.650228894 | -3.512833147 | dmol | 1 | N     | 0.000 |
|                                                                      | H14         | -1.768958169 | -5.131375327 | -3.974638474 | dmol | 1 | H     | 0.000 |
|                                                                      | C15         | -0.153537692 | -5.027461490 | 1.267098271  | dmol | 1 | C     | 0.000 |
|                                                                      | H16         | -0.633006760 | -5.983186727 | 0.965363915  | dmol | 1 | H     | 0.000 |
|                                                                      | H17         | -0.214764510 | -4.986241063 | 2.378859142  | dmol | 1 | H     | 0.000 |
|                                                                      | C18         | 1.350656909  | -5.124124995 | 0.910852116  | dmol | 1 | C     | 0.000 |
|                                                                      | O19         | 1.993158299  | -6.170801070 | 1.159081183  | dmol | 1 | O     | 0.000 |
|                                                                      | O20         | 1.838956708  | -4.048225701 | 0.356252279  | dmol | 1 | O     | 0.000 |
|                                                                      | O21         | -0.796655492 | -3.927970313 | 0.680635788  | dmol | 1 | O     | 0.000 |
|                                                                      | Fe22        | 0.177879413  | 5.268084518  | -0.184215582 | dmol | 1 | Fe    | 0.000 |
|                                                                      | Fe23        | -1.597972185 | 3.416235903  | 0.668547033  | dmol | 1 | Fe    | 0.000 |
|                                                                      | Fe24        | 1.375963141  | 2.811060219  | 0.886919819  | dmol | 1 | Fe    | 0.000 |
|                                                                      | Fe25        | 0.124382115  | 2.747081458  | -1.433035704 | dmol | 1 | Fe    | 0.000 |
|                                                                      | Fe26        | 0.160887076  | 0.144654631  | -1.251509628 | dmol | 1 | Fe    | 0.000 |
|                                                                      | Fe27        | -1.464248357 | 0.136476552  | 1.392576941  | dmol | 1 | Fe    | 0.000 |
|                                                                      | Fe28        | 1.461372216  | 0.215629535  | 0.979729498  | dmol | 1 | Fe    | 0.000 |
|                                                                      | Mo29        | 0.434076904  | -2.343186140 | 0.056903958  | dmol | 1 | Mo    | 0.000 |
|                                                                      | S30         | -1.548969292 | 4.392474101  | -1.359986750 | dmol | 1 | S     | 0.000 |
|                                                                      | S31         | -0.049592302 | 4.382920031  | 1.972905361  | dmol | 1 | S     | 0.000 |

|                                                                                                  |      |              |              |              |      |   |    |       |
|--------------------------------------------------------------------------------------------------|------|--------------|--------------|--------------|------|---|----|-------|
|                                                                                                  | S32  | 0.011424183  | 1.306635606  | -3.147127633 | dmol | 1 | S  | 0.000 |
|                                                                                                  | S33  | 1.990911623  | 4.035433119  | -0.992839267 | dmol | 1 | S  | 0.000 |
|                                                                                                  | S34  | -1.603004020 | -1.134525770 | -0.523860150 | dmol | 1 | S  | 0.000 |
|                                                                                                  | S35  | -3.103114244 | 1.645514664  | 0.818436292  | dmol | 1 | S  | 0.000 |
|                                                                                                  | S36  | 0.960813330  | -1.665068111 | 2.424221136  | dmol | 1 | S  | 0.000 |
|                                                                                                  | S37  | 2.163514113  | -0.978032297 | -0.930973358 | dmol | 1 | S  | 0.000 |
|                                                                                                  | S38  | 2.958611419  | 1.614688188  | 1.910206865  | dmol | 1 | S  | 0.000 |
|                                                                                                  | N39  | 0.138035796  | 1.457313561  | 0.200521380  | dmol | 1 | N  | 0.000 |
|                                                                                                  | N40  | -0.898749402 | 1.182907070  | 3.173523221  | dmol | 1 | N  | 0.000 |
|                                                                                                  | N41  | -1.713719348 | 0.456490241  | 3.532667834  | dmol | 1 | N  | 0.000 |
|                                                                                                  | H42  | -3.681976406 | 1.885895350  | 2.027538725  | dmol | 1 | H  | 0.000 |
|                                                                                                  | H43  | -2.697720022 | 4.378518642  | 1.103217328  | dmol | 1 | H  | 0.000 |
|                                                                                                  | H44  | -2.495370248 | -0.915193236 | 1.807906193  | dmol | 1 | H  | 0.000 |
|                                                                                                  | H45  | -0.286538919 | -1.460408166 | 2.933384507  | dmol | 1 | H  | 0.000 |
| Fig 4                                                                                            |      |              |              |              |      |   |    |       |
| TS: 4HN <sub>2</sub> -c<br>→ 3HN <sub>2</sub> H-a<br>fe6n2nhx2b2x<br>3bteua1_1_42<br>67.26a.cmmf | 45   |              |              |              |      |   |    |       |
|                                                                                                  | C1   | 1.639030314  | 7.898592613  | 0.781517740  | dmol | 1 | C  | 0.000 |
|                                                                                                  | H2   | 2.492327875  | 7.597700877  | 0.158519919  | dmol | 1 | H  | 0.000 |
|                                                                                                  | H3   | 1.649734262  | 8.991936861  | 0.914670583  | dmol | 1 | H  | 0.000 |
|                                                                                                  | H4   | 1.735107813  | 7.414567743  | 1.762694046  | dmol | 1 | H  | 0.000 |
|                                                                                                  | S5   | 0.035383009  | 7.411771370  | -0.043201922 | dmol | 1 | S  | 0.000 |
|                                                                                                  | C6   | 1.350276242  | -3.895432209 | -2.694611197 | dmol | 1 | C  | 0.000 |
|                                                                                                  | H7   | 2.350894463  | -3.556590776 | -2.458365943 | dmol | 1 | H  | 0.000 |
|                                                                                                  | N8   | 0.280569085  | -3.500996403 | -1.910948782 | dmol | 1 | N  | 0.000 |
|                                                                                                  | C9   | 0.903590838  | -4.706385248 | -3.712711069 | dmol | 1 | C  | 0.000 |
|                                                                                                  | H10  | 1.417355247  | -5.216048575 | -4.518484193 | dmol | 1 | H  | 0.000 |
|                                                                                                  | C11  | -0.807549072 | -4.055026051 | -2.424324361 | dmol | 1 | C  | 0.000 |
|                                                                                                  | H12  | -1.807155523 | -3.938389840 | -2.026238601 | dmol | 1 | H  | 0.000 |
|                                                                                                  | N13  | -0.480070091 | -4.804426658 | -3.529979468 | dmol | 1 | N  | 0.000 |
|                                                                                                  | H14  | -1.134437625 | -5.289536687 | -4.132379789 | dmol | 1 | H  | 0.000 |
|                                                                                                  | C15  | -0.503961692 | -4.699126616 | 1.502810370  | dmol | 1 | C  | 0.000 |
|                                                                                                  | H16  | -0.975412688 | -5.694127663 | 1.366825695  | dmol | 1 | H  | 0.000 |
|                                                                                                  | H17  | -0.664289576 | -4.406011779 | 2.566532097  | dmol | 1 | H  | 0.000 |
|                                                                                                  | C18  | 1.025808313  | -4.861199373 | 1.323778586  | dmol | 1 | C  | 0.000 |
|                                                                                                  | O19  | 1.619284223  | -5.876109944 | 1.757500063  | dmol | 1 | O  | 0.000 |
|                                                                                                  | O20  | 1.593167954  | -3.858247534 | 0.708887235  | dmol | 1 | O  | 0.000 |
|                                                                                                  | O21  | -1.067194572 | -3.752820357 | 0.630369360  | dmol | 1 | O  | 0.000 |
|                                                                                                  | Fe22 | 0.197039759  | 5.104281219  | 0.026563649  | dmol | 1 | Fe | 0.000 |
|                                                                                                  | Fe23 | -1.435995788 | 3.005644836  | 0.643411954  | dmol | 1 | Fe | 0.000 |
|                                                                                                  | Fe24 | 1.468779549  | 2.842955556  | 0.843793822  | dmol | 1 | Fe | 0.000 |
|                                                                                                  | Fe25 | 0.297324554  | 2.823644754  | -1.532995582 | dmol | 1 | Fe | 0.000 |
|                                                                                                  | Fe26 | 0.189880406  | 0.235151679  | -1.391728797 | dmol | 1 | Fe | 0.000 |
|                                                                                                  | Fe27 | -1.674247331 | -0.061465922 | 1.191224467  | dmol | 1 | Fe | 0.000 |
|                                                                                                  | Fe28 | 1.466506418  | 0.244855360  | 0.872088247  | dmol | 1 | Fe | 0.000 |
|                                                                                                  | Mo29 | 0.241336726  | -2.199346697 | 0.073174406  | dmol | 1 | Mo | 0.000 |
|                                                                                                  | S30  | -1.474406314 | 4.207752086  | -1.255163161 | dmol | 1 | S  | 0.000 |
|                                                                                                  | S31  | -0.001848648 | 4.134297749  | 2.091646396  | dmol | 1 | S  | 0.000 |
|                                                                                                  | S32  | 0.225621157  | 1.480934241  | -3.293657981 | dmol | 1 | S  | 0.000 |
|                                                                                                  | S33  | 2.070322818  | 4.207329039  | -0.921753848 | dmol | 1 | S  | 0.000 |
|                                                                                                  | S34  | -1.669790133 | -1.041648013 | -0.888318628 | dmol | 1 | S  | 0.000 |
|                                                                                                  | S35  | -3.192588613 | 1.520678751  | 0.498646188  | dmol | 1 | S  | 0.000 |
|                                                                                                  | S36  | 0.436705465  | -1.271556821 | 2.332411400  | dmol | 1 | S  | 0.000 |
|                                                                                                  | S37  | 2.097451530  | -1.012199706 | -0.968720868 | dmol | 1 | S  | 0.000 |
|                                                                                                  | S38  | 3.003737074  | 1.577690162  | 1.835456715  | dmol | 1 | S  | 0.000 |
|                                                                                                  | N39  | 0.188240697  | 1.606912719  | 0.021648705  | dmol | 1 | N  | 0.000 |
|                                                                                                  | N40  | -1.347411469 | 0.712825176  | 3.079741687  | dmol | 1 | N  | 0.000 |
|                                                                                                  | N41  | -2.449049164 | 0.215214444  | 3.070813085  | dmol | 1 | N  | 0.000 |
|                                                                                                  | H42  | -0.447420040 | 0.012404643  | 3.273832920  | dmol | 1 | H  | 0.000 |
|                                                                                                  | H43  | -3.710558225 | 1.781685191  | 1.730654130  | dmol | 1 | H  | 0.000 |
|                                                                                                  | H44  | -2.590559979 | -1.223425735 | 1.391224733  | dmol | 1 | H  | 0.000 |
|                                                                                                  | H45  | -2.541529251 | 3.891291536  | 1.253145990  | dmol | 1 | H  | 0.000 |
| 3HN <sub>2</sub> H-a<br>fe6n2nhx2b2x<br>3bteua1_4a.c<br>mmf                                      | 45   |              |              |              |      |   |    |       |
|                                                                                                  | C1   | 1.753502894  | 8.026879185  | 0.789724566  | dmol | 1 | C  | 0.000 |
|                                                                                                  | H2   | 2.681426906  | 7.702599073  | 0.296965563  | dmol | 1 | H  | 0.000 |
|                                                                                                  | H3   | 1.775319282  | 9.121740710  | 0.919893326  | dmol | 1 | H  | 0.000 |
|                                                                                                  | H4   | 1.696616864  | 7.549035381  | 1.777321211  | dmol | 1 | H  | 0.000 |
|                                                                                                  | S5   | 0.265488582  | 7.579576569  | -0.248697641 | dmol | 1 | S  | 0.000 |
|                                                                                                  | C6   | 1.311115997  | -3.893025759 | -2.780692926 | dmol | 1 | C  | 0.000 |
|                                                                                                  | H7   | 2.308880612  | -3.519765041 | -2.585207448 | dmol | 1 | H  | 0.000 |
|                                                                                                  | N8   | 0.263468625  | -3.551728818 | -1.946413551 | dmol | 1 | N  | 0.000 |
|                                                                                                  | C9   | 0.852760678  | -4.708821235 | -3.790901494 | dmol | 1 | C  | 0.000 |
|                                                                                                  | H10  | 1.346867896  | -5.186809299 | -4.628028973 | dmol | 1 | H  | 0.000 |
|                                                                                                  | C11  | -0.820643491 | -4.141378211 | -2.419144876 | dmol | 1 | C  | 0.000 |
|                                                                                                  | H12  | -1.803803453 | -4.076565227 | -1.970529259 | dmol | 1 | H  | 0.000 |
|                                                                                                  | N13  | -0.516276046 | -4.863798782 | -3.549082106 | dmol | 1 | N  | 0.000 |

|                                                                 |              |              |              |              |      |   |       |       |
|-----------------------------------------------------------------|--------------|--------------|--------------|--------------|------|---|-------|-------|
|                                                                 | H14          | -1.175977503 | -5.371880964 | -4.126497929 | dmol | 1 | H     | 0.000 |
|                                                                 | C15          | -0.379416361 | -4.856274872 | 1.442785260  | dmol | 1 | C     | 0.000 |
|                                                                 | H16          | -0.828658838 | -5.853518304 | 1.257701909  | dmol | 1 | H     | 0.000 |
|                                                                 | H17          | -0.492277080 | -4.651738739 | 2.532839756  | dmol | 1 | H     | 0.000 |
|                                                                 | C18          | 1.140504791  | -4.952064786 | 1.178410032  | dmol | 1 | C     | 0.000 |
|                                                                 | O19          | 1.792779933  | -5.969482212 | 1.500881171  | dmol | 1 | O     | 0.000 |
|                                                                 | O20          | 1.646870469  | -3.881007178 | 0.614434123  | dmol | 1 | O     | 0.000 |
|                                                                 | O21          | -1.008767265 | -3.867937269 | 0.671179912  | dmol | 1 | O     | 0.000 |
|                                                                 | Fe22         | 0.266733977  | 5.240047155  | -0.152057695 | dmol | 1 | Fe    | 0.000 |
|                                                                 | Fe23         | -1.343275454 | 3.112722585  | 0.574196257  | dmol | 1 | Fe    | 0.000 |
|                                                                 | Fe24         | 1.377162345  | 2.897992684  | 0.870371505  | dmol | 1 | Fe    | 0.000 |
|                                                                 | Fe25         | 0.257775892  | 2.803215623  | -1.516509214 | dmol | 1 | Fe    | 0.000 |
|                                                                 | Fe26         | 0.112207895  | 0.190617918  | -1.361570339 | dmol | 1 | Fe    | 0.000 |
|                                                                 | Fe27         | -1.667825201 | -0.284744576 | 1.363090400  | dmol | 1 | Fe    | 0.000 |
|                                                                 | Fe28         | 1.413739595  | 0.283757249  | 1.025712906  | dmol | 1 | Fe    | 0.000 |
|                                                                 | Mo29         | 0.231614227  | -2.230848484 | 0.180260691  | dmol | 1 | Mo    | 0.000 |
|                                                                 | S30          | -1.441259072 | 4.360042875  | -1.348221453 | dmol | 1 | S     | 0.000 |
|                                                                 | S31          | -0.000127058 | 4.361094567  | 1.981904228  | dmol | 1 | S     | 0.000 |
|                                                                 | S32          | 0.160440213  | 1.382726096  | -3.260785624 | dmol | 1 | S     | 0.000 |
|                                                                 | S33          | 2.115230019  | 4.138476864  | -0.971875145 | dmol | 1 | S     | 0.000 |
|                                                                 | S34          | -1.693747473 | -1.151158842 | -0.777829124 | dmol | 1 | S     | 0.000 |
|                                                                 | S35          | -3.036459647 | 1.450356283  | 0.487031892  | dmol | 1 | S     | 0.000 |
|                                                                 | S36          | 0.246305517  | -1.279808315 | 2.319512508  | dmol | 1 | S     | 0.000 |
|                                                                 | S37          | 2.069188670  | -0.989498222 | -0.852554185 | dmol | 1 | S     | 0.000 |
|                                                                 | S38          | 2.836757557  | 1.662237805  | 2.064164745  | dmol | 1 | S     | 0.000 |
|                                                                 | N39          | 0.177251875  | 1.613147329  | 0.042931840  | dmol | 1 | N     | 0.000 |
|                                                                 | N40          | -1.668967980 | 0.804269004  | 3.125594442  | dmol | 1 | N     | 0.000 |
|                                                                 | N41          | -2.548303450 | -0.083810973 | 3.247574561  | dmol | 1 | N     | 0.000 |
|                                                                 | H42          | -0.819189476 | 0.710288483  | 3.738063431  | dmol | 1 | H     | 0.000 |
|                                                                 | H43          | -3.705185160 | 1.784642058  | 1.620739948  | dmol | 1 | H     | 0.000 |
|                                                                 | H44          | -2.681740395 | -1.376240358 | 1.491590300  | dmol | 1 | H     | 0.000 |
|                                                                 | H45          | -2.468111165 | 3.966440972  | 1.171722495  | dmol | 1 | H     | 0.000 |
| <b>3HN<sub>2</sub>H-b</b><br>fe6n2hihx2b2<br>htetau_4a.cm<br>mf | 45           |              |              |              |      |   |       |       |
|                                                                 | C1           | 1.718620343  | 7.940309188  | 0.788307518  | dmol | 1 | C     | 0.000 |
|                                                                 | H2           | 2.645753154  | 7.543320201  | 0.352603885  | dmol | 1 | H     | 0.000 |
|                                                                 | H3           | 1.766909446  | 9.041518998  | 0.798291755  | dmol | 1 | H     | 0.000 |
|                                                                 | H4           | 1.633471420  | 7.576599915  | 1.821003222  | dmol | 1 | H     | 0.000 |
|                                                                 | S5           | 0.232900453  | 7.413419522  | -0.221247447 | dmol | 1 | S     | 0.000 |
|                                                                 | C6           | 1.270986424  | -3.820938589 | -2.843559097 | dmol | 1 | C     | 0.000 |
|                                                                 | H7           | 2.250822913  | -3.376675337 | -2.714888784 | dmol | 1 | H     | 0.000 |
|                                                                 | N8           | 0.271937412  | -3.579676447 | -1.919705509 | dmol | 1 | N     | 0.000 |
|                                                                 | C9           | 0.792896810  | -4.640358920 | -3.842375393 | dmol | 1 | C     | 0.000 |
|                                                                 | H10          | 1.249149903  | -5.055803672 | -4.733220063 | dmol | 1 | H     | 0.000 |
|                                                                 | C11          | -0.802862334 | -4.229463344 | -2.329290413 | dmol | 1 | C     | 0.000 |
|                                                                 | H12          | -1.750842799 | -4.242000990 | -1.805546869 | dmol | 1 | H     | 0.000 |
|                                                                 | N13          | -0.539359880 | -4.898134480 | -3.502316401 | dmol | 1 | N     | 0.000 |
|                                                                 | H14          | -1.204625922 | -5.436652064 | -4.045026420 | dmol | 1 | H     | 0.000 |
|                                                                 | C15          | -0.352183481 | -4.925550380 | 1.411474759  | dmol | 1 | C     | 0.000 |
|                                                                 | H16          | -0.766286453 | -5.917631185 | 1.133933502  | dmol | 1 | H     | 0.000 |
|                                                                 | H17          | -0.482716295 | -4.827065381 | 2.515048789  | dmol | 1 | H     | 0.000 |
|                                                                 | C18          | 1.170628554  | -4.961799092 | 1.163735207  | dmol | 1 | C     | 0.000 |
|                                                                 | O19          | 1.852352437  | -5.976243954 | 1.426280885  | dmol | 1 | O     | 0.000 |
|                                                                 | O20          | 1.653594297  | -3.840709840 | 0.679980534  | dmol | 1 | O     | 0.000 |
|                                                                 | O21          | -1.002345997 | -3.892055803 | 0.722642850  | dmol | 1 | O     | 0.000 |
|                                                                 | Fe22         | 0.267298098  | 5.096725478  | -0.043103783 | dmol | 1 | Fe    | 0.000 |
|                                                                 | Fe23         | -1.444765333 | 2.862998321  | 0.932980169  | dmol | 1 | Fe    | 0.000 |
|                                                                 | Fe24         | 1.443743884  | 2.820758645  | 1.040204274  | dmol | 1 | Fe    | 0.000 |
|                                                                 | Fe25         | 0.207724121  | 2.715897613  | -1.480449315 | dmol | 1 | Fe    | 0.000 |
|                                                                 | Fe26         | 0.191969030  | 0.142564806  | -1.254159822 | dmol | 1 | Fe    | 0.000 |
|                                                                 | Fe27         | -1.650016982 | -0.079063538 | 1.212073944  | dmol | 1 | Fe    | 0.000 |
|                                                                 | Fe28         | 1.410840882  | 0.218423361  | 1.019083991  | dmol | 1 | Fe    | 0.000 |
|                                                                 | Mo29         | 0.232565370  | -2.231910995 | 0.245329636  | dmol | 1 | Mo    | 0.000 |
|                                                                 | S30          | -1.522748313 | 4.149352360  | -1.054106724 | dmol | 1 | S     | 0.000 |
|                                                                 | S31          | 0.031801595  | 4.257900859  | 2.121837394  | dmol | 1 | S     | 0.000 |
| S32                                                             | 0.229025048  | 1.280084771  | -3.193218300 | dmol         | 1    | S | 0.000 |       |
| S33                                                             | 2.095984654  | 4.015182269  | -0.893763470 | dmol         | 1    | S | 0.000 |       |
| S34                                                             | -1.662719723 | -1.196624078 | -0.792199227 | dmol         | 1    | S | 0.000 |       |
| S35                                                             | -3.212154633 | 1.432355111  | 0.225501950  | dmol         | 1    | S | 0.000 |       |
| S36                                                             | 0.113119401  | -1.206706064 | 2.350913474  | dmol         | 1    | S | 0.000 |       |
| S37                                                             | 2.098957977  | -1.060129336 | -0.776528869 | dmol         | 1    | S | 0.000 |       |
| S38                                                             | 2.883678314  | 1.505117832  | 2.124977469  | dmol         | 1    | S | 0.000 |       |
| N39                                                             | 0.186974067  | 1.531181884  | 0.139265708  | dmol         | 1    | N | 0.000 |       |
| N40                                                             | -1.443303079 | 1.456123609  | 2.551029067  | dmol         | 1    | N | 0.000 |       |
| N41                                                             | -2.346017617 | 0.709817687  | 3.026770759  | dmol         | 1    | N | 0.000 |       |
| H42                                                             | -0.541127654 | 1.520898151  | 3.072446464  | dmol         | 1    | H | 0.000 |       |
| H43                                                             | -3.954583635 | 1.585384635  | 1.353756161  | dmol         | 1    | H | 0.000 |       |
| H44                                                             | -2.647122715 | -1.109707260 | 1.666272393  | dmol         | 1    | H | 0.000 |       |
| H45                                                             | -2.577923163 | 3.688965533  | 1.549050147  | dmol         | 1    | H | 0.000 |       |

|                                                                                                            |              |              |              |              |      |   |       |       |
|------------------------------------------------------------------------------------------------------------|--------------|--------------|--------------|--------------|------|---|-------|-------|
| <b>4HN<sub>2</sub>H-a</b><br>fe626n2h262b<br>3btjvab_2a.cm<br>mf                                           | 46           |              |              |              |      |   |       |       |
|                                                                                                            | C1           | 1.452477197  | 8.191579382  | 0.517843335  | dmol | 1 | C     | 0.000 |
|                                                                                                            | H2           | 2.429911083  | 7.939136346  | 0.084128044  | dmol | 1 | H     | 0.000 |
|                                                                                                            | H3           | 1.315079891  | 9.284935081  | 0.482619802  | dmol | 1 | H     | 0.000 |
|                                                                                                            | H4           | 1.434467284  | 7.867668105  | 1.567251004  | dmol | 1 | H     | 0.000 |
|                                                                                                            | S5           | 0.067071117  | 7.379077105  | -0.443567859 | dmol | 1 | S     | 0.000 |
|                                                                                                            | C6           | 1.496185453  | -3.828347883 | -2.876662935 | dmol | 1 | C     | 0.000 |
|                                                                                                            | H7           | 2.459232965  | -3.350180036 | -2.751922243 | dmol | 1 | H     | 0.000 |
|                                                                                                            | N8           | 0.479575479  | -3.595687917 | -1.963756826 | dmol | 1 | N     | 0.000 |
|                                                                                                            | C9           | 1.054120449  | -4.685592843 | -3.858507422 | dmol | 1 | C     | 0.000 |
|                                                                                                            | H10          | 1.544189205  | -5.123525632 | -4.719518738 | dmol | 1 | H     | 0.000 |
|                                                                                                            | C11          | -0.577442448 | -4.287113535 | -2.376881813 | dmol | 1 | C     | 0.000 |
|                                                                                                            | H12          | -1.532028213 | -4.309839005 | -1.869099588 | dmol | 1 | H     | 0.000 |
|                                                                                                            | N13          | -0.273861270 | -4.972748739 | -3.530821453 | dmol | 1 | N     | 0.000 |
|                                                                                                            | H14          | -0.907566415 | -5.571647222 | -4.045086959 | dmol | 1 | H     | 0.000 |
|                                                                                                            | C15          | -0.180123416 | -5.076714927 | 1.394431947  | dmol | 1 | C     | 0.000 |
|                                                                                                            | H16          | -0.538048170 | -6.098248683 | 1.150864423  | dmol | 1 | H     | 0.000 |
|                                                                                                            | H17          | -0.482167657 | -4.877991991 | 2.449045243  | dmol | 1 | H     | 0.000 |
|                                                                                                            | C18          | 1.368364772  | -5.086385497 | 1.384402297  | dmol | 1 | C     | 0.000 |
|                                                                                                            | O19          | 1.990184586  | -6.071757827 | 1.861717105  | dmol | 1 | O     | 0.000 |
|                                                                                                            | O20          | 1.886030883  | -4.010526808 | 0.878780640  | dmol | 1 | O     | 0.000 |
|                                                                                                            | O21          | -0.739665133 | -4.118607674 | 0.530193228  | dmol | 1 | O     | 0.000 |
|                                                                                                            | Fe22         | 0.331693179  | 5.174689767  | -0.043799186 | dmol | 1 | Fe    | 0.000 |
|                                                                                                            | Fe23         | -1.523782148 | 2.854808111  | 0.774105649  | dmol | 1 | Fe    | 0.000 |
|                                                                                                            | Fe24         | 1.402380497  | 2.786926754  | 0.910969631  | dmol | 1 | Fe    | 0.000 |
|                                                                                                            | Fe25         | 0.191814194  | 2.744293050  | -1.461923526 | dmol | 1 | Fe    | 0.000 |
|                                                                                                            | Fe26         | 0.133239297  | 0.130273834  | -1.341010115 | dmol | 1 | Fe    | 0.000 |
|                                                                                                            | Fe27         | -1.971837841 | 0.120071522  | 1.179908248  | dmol | 1 | Fe    | 0.000 |
|                                                                                                            | Fe28         | 1.393339800  | 0.212573451  | 0.937458078  | dmol | 1 | Fe    | 0.000 |
|                                                                                                            | Mo29         | 0.425383150  | -2.455114126 | 0.043637988  | dmol | 1 | Mo    | 0.000 |
|                                                                                                            | S30          | -1.464841942 | 4.285432425  | -1.005347629 | dmol | 1 | S     | 0.000 |
|                                                                                                            | S31          | 0.075540674  | 4.286107776  | 1.985494307  | dmol | 1 | S     | 0.000 |
|                                                                                                            | S32          | 0.061502453  | 1.395532238  | -3.223633138 | dmol | 1 | S     | 0.000 |
|                                                                                                            | S33          | 2.047076567  | 4.072505757  | -0.944605181 | dmol | 1 | S     | 0.000 |
|                                                                                                            | S34          | -1.631994121 | -1.286614095 | -0.707583008 | dmol | 1 | S     | 0.000 |
|                                                                                                            | S35          | -0.332755157 | 1.543224492  | -0.039680092 | dmol | 1 | S     | 0.000 |
|                                                                                                            | S36          | -0.173862525 | -1.217173557 | 2.078147139  | dmol | 1 | S     | 0.000 |
|                                                                                                            | S37          | 2.146666566  | -1.050165013 | -0.875924424 | dmol | 1 | S     | 0.000 |
|                                                                                                            | S38          | 2.806826747  | 1.516125603  | 2.099573100  | dmol | 1 | S     | 0.000 |
|                                                                                                            | N39          | 0.126358153  | 1.519296403  | 0.076666240  | dmol | 1 | N     | 0.000 |
|                                                                                                            | N40          | -1.726725840 | 1.681584901  | 2.453702994  | dmol | 1 | N     | 0.000 |
|                                                                                                            | N41          | -2.645839450 | 0.892031591  | 2.882975450  | dmol | 1 | N     | 0.000 |
|                                                                                                            | H42          | -0.921700410 | 1.826715713  | 3.098007035  | dmol | 1 | H     | 0.000 |
|                                                                                                            | H43          | 0.293388323  | -1.361422099 | 3.368797090  | dmol | 1 | H     | 0.000 |
|                                                                                                            | H44          | -2.586206149 | 3.784547009  | 1.376604449  | dmol | 1 | H     | 0.000 |
|                                                                                                            | H45          | -4.208183728 | 1.868877813  | 0.950229935  | dmol | 1 | H     | 0.000 |
| H46                                                                                                        | -2.993467542 | -0.922609124 | 1.561777228  | dmol         | 1    | H | 0.000 |       |
| <b>TS: 4HN<sub>2</sub>H-a</b><br><b>→ 4HN<sub>2</sub>H-b</b><br>fe626n2h262b<br>3btmab_1_431<br>2.23a.cmmf | 46           |              |              |              |      |   |       |       |
|                                                                                                            | C1           | 1.481315110  | 8.198108631  | 0.483021340  | dmol | 1 | C     | 0.000 |
|                                                                                                            | H2           | 2.450624227  | 7.942542205  | 0.033058324  | dmol | 1 | H     | 0.000 |
|                                                                                                            | H3           | 1.342384928  | 9.290824946  | 0.440359276  | dmol | 1 | H     | 0.000 |
|                                                                                                            | H4           | 1.485144490  | 7.884319685  | 1.535945608  | dmol | 1 | H     | 0.000 |
|                                                                                                            | S5           | 0.076451886  | 7.382621708  | -0.448902559 | dmol | 1 | S     | 0.000 |
|                                                                                                            | C6           | 1.444759532  | -3.881697664 | -2.876948575 | dmol | 1 | C     | 0.000 |
|                                                                                                            | H7           | 2.421193781  | -3.431096265 | -2.754627742 | dmol | 1 | H     | 0.000 |
|                                                                                                            | N8           | 0.427345409  | -3.615644729 | -1.967228826 | dmol | 1 | N     | 0.000 |
|                                                                                                            | C9           | 0.988411493  | -4.750431306 | -3.841731669 | dmol | 1 | C     | 0.000 |
|                                                                                                            | H10          | 1.466272711  | -5.191066892 | -4.707875064 | dmol | 1 | H     | 0.000 |
|                                                                                                            | C11          | -0.640577691 | -4.307916110 | -2.369506135 | dmol | 1 | C     | 0.000 |
|                                                                                                            | H12          | -1.592063266 | -4.319576611 | -1.856380436 | dmol | 1 | H     | 0.000 |
|                                                                                                            | N13          | -0.337450735 | -5.026263420 | -3.504260096 | dmol | 1 | N     | 0.000 |
|                                                                                                            | H14          | -0.992034390 | -5.587018508 | -4.033613281 | dmol | 1 | H     | 0.000 |
|                                                                                                            | C15          | -0.240034651 | -5.001233691 | 1.423987762  | dmol | 1 | C     | 0.000 |
|                                                                                                            | H16          | -0.619314414 | -6.018895614 | 1.200516669  | dmol | 1 | H     | 0.000 |
|                                                                                                            | H17          | -0.517226363 | -4.775069908 | 2.477021005  | dmol | 1 | H     | 0.000 |
|                                                                                                            | C18          | 1.310376065  | -5.025579616 | 1.365327963  | dmol | 1 | C     | 0.000 |
|                                                                                                            | O19          | 1.932200507  | -6.002991102 | 1.859392162  | dmol | 1 | O     | 0.000 |
|                                                                                                            | O20          | 1.820361555  | -3.982079497 | 0.797052538  | dmol | 1 | O     | 0.000 |
|                                                                                                            | O21          | -0.822860882 | -4.049445604 | 0.562203701  | dmol | 1 | O     | 0.000 |
|                                                                                                            | Fe22         | 0.344808534  | 5.180710341  | -0.062973785 | dmol | 1 | Fe    | 0.000 |
|                                                                                                            | Fe23         | -1.488942524 | 2.848562976  | 0.788554265  | dmol | 1 | Fe    | 0.000 |
|                                                                                                            | Fe24         | 1.411797658  | 2.807879015  | 0.861472787  | dmol | 1 | Fe    | 0.000 |
|                                                                                                            | Fe25         | 0.184232150  | 2.720770846  | -1.487182776 | dmol | 1 | Fe    | 0.000 |
|                                                                                                            | Fe26         | 0.111233097  | 0.118880257  | -1.338127326 | dmol | 1 | Fe    | 0.000 |
|                                                                                                            | Fe27         | -1.771991931 | 0.105467406  | 1.114567034  | dmol | 1 | Fe    | 0.000 |
|                                                                                                            | Fe28         | 1.402312237  | 0.241648397  | 0.958316339  | dmol | 1 | Fe    | 0.000 |
|                                                                                                            | Mo29         | 0.327777261  | -2.459830430 | -0.063044837 | dmol | 1 | Mo    | 0.000 |

|                                                                                                                  |              |              |              |              |      |   |       |       |
|------------------------------------------------------------------------------------------------------------------|--------------|--------------|--------------|--------------|------|---|-------|-------|
|                                                                                                                  | S30          | -1.464275338 | 4.276756602  | -1.001428661 | dmol | 1 | S     | 0.000 |
|                                                                                                                  | S31          | 0.107113181  | 4.300107185  | 1.959970607  | dmol | 1 | S     | 0.000 |
|                                                                                                                  | S32          | 0.068913592  | 1.354812334  | -3.234918086 | dmol | 1 | S     | 0.000 |
|                                                                                                                  | S33          | 2.036621757  | 4.076132978  | -0.993085847 | dmol | 1 | S     | 0.000 |
|                                                                                                                  | S34          | -1.656670701 | -1.279929916 | -0.759121103 | dmol | 1 | S     | 0.000 |
|                                                                                                                  | S35          | -3.291493929 | 1.516130690  | 0.028790508  | dmol | 1 | S     | 0.000 |
|                                                                                                                  | S36          | 0.219744101  | -1.243713453 | 2.323972456  | dmol | 1 | S     | 0.000 |
|                                                                                                                  | S37          | 2.115479397  | -1.043866364 | -0.844412547 | dmol | 1 | S     | 0.000 |
|                                                                                                                  | S38          | 2.862207755  | 1.583886881  | 2.018403463  | dmol | 1 | S     | 0.000 |
|                                                                                                                  | N39          | 0.114967721  | 1.498873215  | 0.075791486  | dmol | 1 | N     | 0.000 |
|                                                                                                                  | N40          | -1.561831492 | 1.619728100  | 2.447787887  | dmol | 1 | N     | 0.000 |
|                                                                                                                  | N41          | -2.432367801 | 0.770100792  | 2.873894457  | dmol | 1 | N     | 0.000 |
|                                                                                                                  | H42          | -0.708151554 | 1.712452655  | 3.034687727  | dmol | 1 | H     | 0.000 |
|                                                                                                                  | H43          | -0.406119117 | -0.977873920 | 3.494196915  | dmol | 1 | H     | 0.000 |
|                                                                                                                  | H44          | -2.550247131 | 3.760399409  | 1.415371648  | dmol | 1 | H     | 0.000 |
|                                                                                                                  | H45          | -4.118604810 | 1.767317540  | 1.080074111  | dmol | 1 | H     | 0.000 |
|                                                                                                                  | H46          | -2.741791415 | -0.987814176 | 1.491631315  | dmol | 1 | H     | 0.000 |
| <b>4HN<sub>2</sub>H-b</b><br>fe626n2h262b<br>3btkvab_4a.c<br>mmf                                                 | 46           |              |              |              |      |   |       |       |
|                                                                                                                  | C1           | 1.594320890  | 8.152990950  | 0.408061264  | dmol | 1 | C     | 0.000 |
|                                                                                                                  | H2           | 2.563071238  | 7.862941064  | -0.021876070 | dmol | 1 | H     | 0.000 |
|                                                                                                                  | H3           | 1.487802843  | 9.248672526  | 0.347319361  | dmol | 1 | H     | 0.000 |
|                                                                                                                  | H4           | 1.570617368  | 7.854600992  | 1.464721315  | dmol | 1 | H     | 0.000 |
|                                                                                                                  | S5           | 0.181684756  | 7.355017635  | -0.526386185 | dmol | 1 | S     | 0.000 |
|                                                                                                                  | C6           | 1.372283720  | -3.767341081 | -2.791352948 | dmol | 1 | C     | 0.000 |
|                                                                                                                  | H7           | 2.331290033  | -3.277650792 | -2.679804166 | dmol | 1 | H     | 0.000 |
|                                                                                                                  | N8           | 0.363712221  | -3.547126969 | -1.867969563 | dmol | 1 | N     | 0.000 |
|                                                                                                                  | C9           | 0.930404126  | -4.635954251 | -3.762588232 | dmol | 1 | C     | 0.000 |
|                                                                                                                  | H10          | 1.409122207  | -5.054725631 | -4.639445078 | dmol | 1 | H     | 0.000 |
|                                                                                                                  | C11          | -0.682453250 | -4.265058525 | -2.254861365 | dmol | 1 | C     | 0.000 |
|                                                                                                                  | H12          | -1.622808771 | -4.314283531 | -1.721896701 | dmol | 1 | H     | 0.000 |
|                                                                                                                  | N13          | -0.384791846 | -4.951624108 | -3.408611153 | dmol | 1 | N     | 0.000 |
|                                                                                                                  | H14          | -1.021638337 | -5.545313241 | -3.925370664 | dmol | 1 | H     | 0.000 |
|                                                                                                                  | C15          | -0.190299571 | -5.009741192 | 1.447236584  | dmol | 1 | C     | 0.000 |
|                                                                                                                  | H16          | -0.573577977 | -6.009491966 | 1.154771650  | dmol | 1 | H     | 0.000 |
|                                                                                                                  | H17          | -0.400235682 | -4.893067685 | 2.533528422  | dmol | 1 | H     | 0.000 |
|                                                                                                                  | C18          | 1.350840831  | -5.026264350 | 1.295245214  | dmol | 1 | C     | 0.000 |
|                                                                                                                  | O19          | 2.003428201  | -6.037538189 | 1.656165087  | dmol | 1 | O     | 0.000 |
|                                                                                                                  | O20          | 1.841384167  | -3.934873887 | 0.790094003  | dmol | 1 | O     | 0.000 |
|                                                                                                                  | O21          | -0.818469033 | -3.990963454 | 0.707701877  | dmol | 1 | O     | 0.000 |
|                                                                                                                  | Fe22         | 0.365714832  | 5.161157987  | -0.053823578 | dmol | 1 | Fe    | 0.000 |
|                                                                                                                  | Fe23         | -1.544317952 | 2.906960006  | 0.816454126  | dmol | 1 | Fe    | 0.000 |
|                                                                                                                  | Fe24         | 1.354713530  | 2.745998343  | 0.891663779  | dmol | 1 | Fe    | 0.000 |
|                                                                                                                  | Fe25         | 0.127609651  | 2.694636235  | -1.449944177 | dmol | 1 | Fe    | 0.000 |
|                                                                                                                  | Fe26         | 0.145616835  | 0.100756711  | -1.322854102 | dmol | 1 | Fe    | 0.000 |
|                                                                                                                  | Fe27         | -1.842848708 | 0.201959908  | 0.916202920  | dmol | 1 | Fe    | 0.000 |
|                                                                                                                  | Fe28         | 1.303322639  | 0.152869975  | 1.011071016  | dmol | 1 | Fe    | 0.000 |
|                                                                                                                  | Mo29         | 0.346814618  | -2.358170172 | 0.146526929  | dmol | 1 | Mo    | 0.000 |
|                                                                                                                  | S30          | -1.473834845 | 4.312853191  | -0.986738896 | dmol | 1 | S     | 0.000 |
|                                                                                                                  | S31          | 0.106152789  | 4.293671445  | 1.981331479  | dmol | 1 | S     | 0.000 |
|                                                                                                                  | S32          | 0.071052957  | 1.331021887  | -3.212544726 | dmol | 1 | S     | 0.000 |
|                                                                                                                  | S33          | 2.020722024  | 3.990419076  | -0.961426669 | dmol | 1 | S     | 0.000 |
|                                                                                                                  | S34          | -1.645949427 | -1.276862143 | -0.790298931 | dmol | 1 | S     | 0.000 |
|                                                                                                                  | S35          | -3.362111396 | 1.659303350  | -0.010372253 | dmol | 1 | S     | 0.000 |
| S36                                                                                                              | 0.614289096  | -1.559082901 | 2.563290076  | dmol         | 1    | S | 0.000 |       |
| S37                                                                                                              | 2.124081925  | -1.034467181 | -0.802337701 | dmol         | 1    | S | 0.000 |       |
| S38                                                                                                              | 2.782334504  | 1.508994274  | 2.045479306  | dmol         | 1    | S | 0.000 |       |
| N39                                                                                                              | 0.025091883  | 1.458173549  | 0.098996016  | dmol         | 1    | N | 0.000 |       |
| N40                                                                                                              | -1.581350625 | 1.579146395  | 2.420651697  | dmol         | 1    | N | 0.000 |       |
| N41                                                                                                              | -2.365587333 | 0.605474887  | 2.758876986  | dmol         | 1    | N | 0.000 |       |
| H42                                                                                                              | -0.693278321 | 1.623534184  | 2.963066726  | dmol         | 1    | H | 0.000 |       |
| H43                                                                                                              | -0.585040573 | -1.083039554 | 3.009230530  | dmol         | 1    | H | 0.000 |       |
| H44                                                                                                              | -2.573606117 | 3.836144941  | 1.465368050  | dmol         | 1    | H | 0.000 |       |
| H45                                                                                                              | -4.166872665 | 1.802878541  | 1.076935302  | dmol         | 1    | H | 0.000 |       |
| H46                                                                                                              | -2.858407456 | -0.867537248 | 1.220513441  | dmol         | 1    | H | 0.000 |       |
| <b>TS: 4HN<sub>2</sub>H-b</b><br>→ 3HN <sub>2</sub> H <sub>2</sub> -a<br>fe626n2h2h6h<br>2b3btkvf_orig<br>a.cmmf | 45           |              |              |              |      |   |       |       |
|                                                                                                                  | C1           | 1.426575     | 6.867172     | 0.542404     | dmol | 1 | C     | 0.000 |
|                                                                                                                  | H2           | 2.377533     | 6.625610     | 0.048569     | dmol | 1 | H     | 0.000 |
|                                                                                                                  | H3           | 1.284744     | 7.960266     | 0.530273     | dmol | 1 | H     | 0.000 |
|                                                                                                                  | H4           | 1.471497     | 6.525635     | 1.585144     | dmol | 1 | H     | 0.000 |
|                                                                                                                  | S5           | -0.009293    | 6.071106     | -0.360718    | dmol | 1 | S     | 0.000 |
|                                                                                                                  | C6           | 1.369659     | -5.204666    | -3.032150    | dmol | 1 | C     | 0.000 |
|                                                                                                                  | H7           | 2.346054     | -4.747467    | -2.934372    | dmol | 1 | H     | 0.000 |
|                                                                                                                  | N8           | 0.389206     | -4.977798    | -2.081390    | dmol | 1 | N     | 0.000 |
|                                                                                                                  | C9           | 0.882431     | -6.038452    | -4.014084    | dmol | 1 | C     | 0.000 |
|                                                                                                                  | H10          | 1.325378     | -6.450700    | -4.913300    | dmol | 1 | H     | 0.000 |
|                                                                                                                  | C11          | -0.684998    | -5.652756    | -2.463806    | dmol | 1 | C     | 0.000 |
|                                                                                                                  | H12          | -1.615479    | -5.687912    | -1.912308    | dmol | 1 | H     | 0.000 |

|                                                                               |              |              |              |              |      |   |       |       |
|-------------------------------------------------------------------------------|--------------|--------------|--------------|--------------|------|---|-------|-------|
|                                                                               | N13          | -0.434738    | -6.321442    | -3.638260    | dmol | 1 | N     | 0.000 |
|                                                                               | H14          | -1.106781    | -6.868942    | -4.163391    | dmol | 1 | H     | 0.000 |
|                                                                               | C15          | -0.210037    | -6.360519    | 1.279419     | dmol | 1 | C     | 0.000 |
|                                                                               | H16          | -0.576645    | -7.379013    | 1.035004     | dmol | 1 | H     | 0.000 |
|                                                                               | H17          | -0.432755    | -6.183868    | 2.356140     | dmol | 1 | H     | 0.000 |
|                                                                               | C18          | 1.333511     | -6.365219    | 1.150070     | dmol | 1 | C     | 0.000 |
|                                                                               | O19          | 2.000961     | -7.353317    | 1.539719     | dmol | 1 | O     | 0.000 |
|                                                                               | O20          | 1.818130     | -5.273071    | 0.629135     | dmol | 1 | O     | 0.000 |
|                                                                               | O21          | -0.838989    | -5.391525    | 0.476944     | dmol | 1 | O     | 0.000 |
|                                                                               | Fe22         | 0.210739     | 3.853943     | -0.115295    | dmol | 1 | Fe    | 0.000 |
|                                                                               | Fe23         | -1.624817    | 1.543167     | 0.970505     | dmol | 1 | Fe    | 0.000 |
|                                                                               | Fe24         | 1.235580     | 1.350204     | 0.802155     | dmol | 1 | Fe    | 0.000 |
|                                                                               | Fe25         | 0.042313     | 1.297195     | -1.550766    | dmol | 1 | Fe    | 0.000 |
|                                                                               | Fe26         | 0.130951     | -1.283752    | -1.487473    | dmol | 1 | Fe    | 0.000 |
|                                                                               | Fe27         | -1.716600    | -1.083771    | 0.780731     | dmol | 1 | Fe    | 0.000 |
|                                                                               | Fe28         | 1.372711     | -1.236328    | 0.844864     | dmol | 1 | Fe    | 0.000 |
|                                                                               | Mo29         | 0.331741     | -3.725357    | -0.022659    | dmol | 1 | Mo    | 0.000 |
|                                                                               | S30          | -1.578171    | 2.867142     | -1.030060    | dmol | 1 | S     | 0.000 |
|                                                                               | S31          | -0.014557    | 2.932449     | 1.908051     | dmol | 1 | S     | 0.000 |
|                                                                               | S32          | -0.016220    | -0.032562    | -3.343964    | dmol | 1 | S     | 0.000 |
|                                                                               | S33          | 1.852127     | 2.691544     | -0.994812    | dmol | 1 | S     | 0.000 |
|                                                                               | S34          | -1.639465    | -2.623245    | -0.954773    | dmol | 1 | S     | 0.000 |
|                                                                               | S35          | -3.412445    | 0.307373     | 0.131622     | dmol | 1 | S     | 0.000 |
|                                                                               | S36          | 0.354523     | -2.815338    | 2.315109     | dmol | 1 | S     | 0.000 |
|                                                                               | S37          | 2.119293     | -2.400284    | -0.997375    | dmol | 1 | S     | 0.000 |
|                                                                               | S38          | 2.773071     | 0.162277     | 1.888046     | dmol | 1 | S     | 0.000 |
|                                                                               | N39          | 0.000000     | 0.000000     | 0.000000     | dmol | 1 | N     | 0.000 |
|                                                                               | N40          | -1.400345    | 0.142334     | 2.433975     | dmol | 1 | N     | 0.000 |
|                                                                               | N41          | -2.056442    | -0.946960    | 2.773804     | dmol | 1 | N     | 0.000 |
|                                                                               | H42          | -0.417603    | 0.153564     | 2.783554     | dmol | 1 | H     | 0.000 |
|                                                                               | H43          | -0.832703    | -2.097717    | 2.690659     | dmol | 1 | H     | 0.000 |
|                                                                               | H44          | -2.667969    | 2.350403     | 1.723328     | dmol | 1 | H     | 0.000 |
|                                                                               | H45          | -4.133575    | 0.196259     | 1.281387     | dmol | 1 | H     | 0.000 |
|                                                                               | H46          | -2.780167    | -2.109985    | 1.094345     | dmol | 1 | H     | 0.000 |
| <b>3HN<sub>2</sub>H<sub>2</sub>-a</b><br>fe626n2h2h6h<br>2b3btkfv_4a.c<br>mmf | 46           |              |              |              |      |   |       |       |
|                                                                               | C1           | 1.482625197  | 8.207395271  | 0.640294296  | dmol | 1 | C     | 0.000 |
|                                                                               | H2           | 2.440049149  | 7.960268347  | 0.161570713  | dmol | 1 | H     | 0.000 |
|                                                                               | H3           | 1.355959088  | 9.302476086  | 0.642827854  | dmol | 1 | H     | 0.000 |
|                                                                               | H4           | 1.501123092  | 7.848315469  | 1.677693896  | dmol | 1 | H     | 0.000 |
|                                                                               | S5           | 0.053097392  | 7.438961964  | -0.295822245 | dmol | 1 | S     | 0.000 |
|                                                                               | C6           | 1.419623769  | -3.860996263 | -3.056658503 | dmol | 1 | C     | 0.000 |
|                                                                               | H7           | 2.385509553  | -3.375018962 | -2.992891670 | dmol | 1 | H     | 0.000 |
|                                                                               | N8           | 0.476988195  | -3.675702216 | -2.061505766 | dmol | 1 | N     | 0.000 |
|                                                                               | C9           | 0.912393672  | -4.693753480 | -4.029288809 | dmol | 1 | C     | 0.000 |
|                                                                               | H10          | 1.326718702  | -5.082260607 | -4.951920148 | dmol | 1 | H     | 0.000 |
|                                                                               | C11          | -0.594547874 | -4.373556811 | -2.405140647 | dmol | 1 | C     | 0.000 |
|                                                                               | H12          | -1.494410041 | -4.441557280 | -1.806142174 | dmol | 1 | H     | 0.000 |
|                                                                               | N13          | -0.379037095 | -5.018060134 | -3.600284665 | dmol | 1 | N     | 0.000 |
|                                                                               | H14          | -1.060354358 | -5.571604189 | -4.106139524 | dmol | 1 | H     | 0.000 |
|                                                                               | C15          | -0.145554151 | -5.013147293 | 1.341666710  | dmol | 1 | C     | 0.000 |
|                                                                               | H16          | -0.507623963 | -6.037861920 | 1.114047764  | dmol | 1 | H     | 0.000 |
|                                                                               | H17          | -0.386140539 | -4.821877909 | 2.413679191  | dmol | 1 | H     | 0.000 |
|                                                                               | C18          | 1.398530118  | -5.017118601 | 1.240801384  | dmol | 1 | C     | 0.000 |
|                                                                               | O19          | 2.065609257  | -6.000036732 | 1.642929535  | dmol | 1 | O     | 0.000 |
|                                                                               | O20          | 1.888505311  | -3.922169746 | 0.726841238  | dmol | 1 | O     | 0.000 |
|                                                                               | O21          | -0.752767836 | -4.060645834 | 0.510057292  | dmol | 1 | O     | 0.000 |
|                                                                               | Fe22         | 0.276257973  | 5.219946880  | -0.054458520 | dmol | 1 | Fe    | 0.000 |
|                                                                               | Fe23         | -1.541532036 | 2.899942055  | 1.093415038  | dmol | 1 | Fe    | 0.000 |
|                                                                               | Fe24         | 1.355609080  | 2.739737037  | 0.855337680  | dmol | 1 | Fe    | 0.000 |
|                                                                               | Fe25         | 0.086538129  | 2.657351677  | -1.457794475 | dmol | 1 | Fe    | 0.000 |
|                                                                               | Fe26         | 0.205942705  | 0.092486746  | -1.415440184 | dmol | 1 | Fe    | 0.000 |
|                                                                               | Fe27         | -1.570992788 | 0.141827333  | 1.121829335  | dmol | 1 | Fe    | 0.000 |
|                                                                               | Fe28         | 1.486049887  | 0.158604820  | 0.871216283  | dmol | 1 | Fe    | 0.000 |
|                                                                               | Mo29         | 0.443399983  | -2.385105898 | 0.013500566  | dmol | 1 | Mo    | 0.000 |
|                                                                               | S30          | -1.541042258 | 4.223743204  | -0.898534793 | dmol | 1 | S     | 0.000 |
|                                                                               | S31          | 0.096494173  | 4.305971324  | 1.978712406  | dmol | 1 | S     | 0.000 |
|                                                                               | S32          | 0.020164873  | 1.344685479  | -3.264091685 | dmol | 1 | S     | 0.000 |
| S33                                                                           | 1.892664798  | 4.072926934  | -0.990249837 | dmol         | 1    | S | 0.000 |       |
| S34                                                                           | -1.556400320 | -1.272240697 | -0.812217111 | dmol         | 1    | S | 0.000 |       |
| S35                                                                           | -3.287362801 | 1.569600696  | 0.241699982  | dmol         | 1    | S | 0.000 |       |
| S36                                                                           | 0.169790999  | -1.268055927 | 2.140787926  | dmol         | 1    | S | 0.000 |       |
| S37                                                                           | 2.201037926  | -1.033364268 | -0.990692146 | dmol         | 1    | S | 0.000 |       |
| S38                                                                           | 2.884502738  | 1.544217783  | 1.956675139  | dmol         | 1    | S | 0.000 |       |
| N39                                                                           | 0.113710958  | 1.377481541  | 0.092786959  | dmol         | 1    | N | 0.000 |       |
| N40                                                                           | -1.357148292 | 1.552554772  | 2.536802879  | dmol         | 1    | N | 0.000 |       |
| N41                                                                           | -2.315182591 | 0.666362748  | 2.951970991  | dmol         | 1    | N | 0.000 |       |
| H42                                                                           | -0.438250065 | 1.431280915  | 2.989104280  | dmol         | 1    | H | 0.000 |       |
| H43                                                                           | -1.850902604 | 0.000065353  | 3.594069194  | dmol         | 1    | H | 0.000 |       |

|                                                                                                          |              |              |              |              |      |    |       |       |
|----------------------------------------------------------------------------------------------------------|--------------|--------------|--------------|--------------|------|----|-------|-------|
|                                                                                                          | H44          | -2.608381443 | 3.685740351  | 1.839106623  | dmol | 1  | H     | 0.000 |
|                                                                                                          | H45          | -4.021119638 | 1.466383554  | 1.381079994  | dmol | 1  | H     | 0.000 |
|                                                                                                          | H46          | -2.530146023 | -0.984193571 | 1.418767748  | dmol | 1  | H     | 0.000 |
| <b>Fig 5</b>                                                                                             |              |              |              |              |      |    |       |       |
| <b>4HN<sub>2</sub>-c</b><br>fe6n2enhx3b2<br>bfe2h3v_7a.c<br>mmf                                          | 45           |              |              |              |      |    |       |       |
|                                                                                                          | C1           | 1.901907098  | 7.913521600  | 1.037688295  | dmol | 1  | C     | 0.000 |
|                                                                                                          | H2           | 2.809574244  | 7.522069226  | 0.559514746  | dmol | 1  | H     | 0.000 |
|                                                                                                          | H3           | 2.015391349  | 8.998513985  | 1.197080179  | dmol | 1  | H     | 0.000 |
|                                                                                                          | H4           | 1.778320977  | 7.419779084  | 2.010171541  | dmol | 1  | H     | 0.000 |
|                                                                                                          | S5           | 0.407022988  | 7.601671354  | -0.044435093 | dmol | 1  | S     | 0.000 |
|                                                                                                          | C6           | 0.947669066  | -3.598975977 | -3.037360464 | dmol | 1  | C     | 0.000 |
|                                                                                                          | H7           | 1.966833517  | -3.249481266 | -2.934507354 | dmol | 1  | H     | 0.000 |
|                                                                                                          | N8           | 0.002147411  | -3.290946539 | -2.075269278 | dmol | 1  | N     | 0.000 |
|                                                                                                          | C9           | 0.369516401  | -4.361333982 | -4.026718961 | dmol | 1  | C     | 0.000 |
|                                                                                                          | H10          | 0.761416283  | -4.798092649 | -4.937068208 | dmol | 1  | H     | 0.000 |
|                                                                                                          | C11          | -1.136829887 | -3.851846492 | -2.452157746 | dmol | 1  | C     | 0.000 |
|                                                                                                          | H12          | -2.064671054 | -3.792305432 | -1.899094141 | dmol | 1  | H     | 0.000 |
|                                                                                                          | N13          | -0.966097266 | -4.518286200 | -3.641036822 | dmol | 1  | N     | 0.000 |
|                                                                                                          | H14          | -1.688086963 | -5.013844444 | -4.149809100 | dmol | 1  | H     | 0.000 |
|                                                                                                          | C15          | -0.137378571 | -4.996956256 | 1.196685958  | dmol | 1  | C     | 0.000 |
|                                                                                                          | H16          | -0.650410478 | -5.957526179 | 0.990104023  | dmol | 1  | H     | 0.000 |
|                                                                                                          | H17          | -0.077794389 | -4.890590948 | 2.303091182  | dmol | 1  | H     | 0.000 |
|                                                                                                          | C18          | 1.322403367  | -5.096180200 | 0.691307548  | dmol | 1  | C     | 0.000 |
|                                                                                                          | O19          | 1.957875920  | -6.174108469 | 0.801386078  | dmol | 1  | O     | 0.000 |
|                                                                                                          | O20          | 1.774661563  | -3.987274057 | 0.184481573  | dmol | 1  | O     | 0.000 |
|                                                                                                          | O21          | -0.845749449 | -3.918357252 | 0.634841927  | dmol | 1  | O     | 0.000 |
|                                                                                                          | Fe22         | 0.181240460  | 5.266247235  | -0.052051461 | dmol | 1  | Fe    | 0.000 |
|                                                                                                          | Fe23         | -1.421126089 | 3.175171395  | 0.829213885  | dmol | 1  | Fe    | 0.000 |
|                                                                                                          | Fe24         | 1.282013961  | 2.788328149  | 1.007351742  | dmol | 1  | Fe    | 0.000 |
|                                                                                                          | Fe25         | 0.142735615  | 2.822101365  | -1.390921072 | dmol | 1  | Fe    | 0.000 |
|                                                                                                          | Fe26         | 0.012770749  | 0.234661061  | -1.237790635 | dmol | 1  | Fe    | 0.000 |
|                                                                                                          | Fe27         | -1.658100110 | 0.063592953  | 1.274939208  | dmol | 1  | Fe    | 0.000 |
|                                                                                                          | Fe28         | 1.255158076  | 0.180877143  | 1.046406550  | dmol | 1  | Fe    | 0.000 |
|                                                                                                          | Mo29         | 0.279016301  | -2.275045834 | 0.039842540  | dmol | 1  | Mo    | 0.000 |
|                                                                                                          | S30          | -1.557830374 | 4.392034218  | -1.178331362 | dmol | 1  | S     | 0.000 |
|                                                                                                          | S31          | -0.016125878 | 4.363228402  | 2.139445949  | dmol | 1  | S     | 0.000 |
|                                                                                                          | S32          | 0.004350565  | 1.439555222  | -3.134346246 | dmol | 1  | S     | 0.000 |
|                                                                                                          | S33          | 2.006133317  | 4.028427249  | -0.877231309 | dmol | 1  | S     | 0.000 |
|                                                                                                          | S34          | -1.768500906 | -1.094693757 | -0.644404647 | dmol | 1  | S     | 0.000 |
|                                                                                                          | S35          | -3.270256346 | 1.674306060  | 0.940222093  | dmol | 1  | S     | 0.000 |
|                                                                                                          | S36          | 1.078427312  | -1.810335710 | 2.411266652  | dmol | 1  | S     | 0.000 |
|                                                                                                          | S37          | 2.002261462  | -0.893073903 | -0.907169550 | dmol | 1  | S     | 0.000 |
|                                                                                                          | S38          | 2.726222274  | 1.545516510  | 2.111311723  | dmol | 1  | S     | 0.000 |
|                                                                                                          | N39          | -0.031726217 | 1.590809690  | 0.231582835  | dmol | 1  | N     | 0.000 |
|                                                                                                          | N40          | -1.073498657 | 0.923507387  | 3.132939022  | dmol | 1  | N     | 0.000 |
| N41                                                                                                      | -1.747067944 | 0.042511873  | 3.442002238  | dmol         | 1    | N  | 0.000 |       |
| H42                                                                                                      | -3.686786101 | 1.973802730  | 2.205439762  | dmol         | 1    | H  | 0.000 |       |
| H43                                                                                                      | -0.010956286 | -1.533655483 | 3.172369147  | dmol         | 1    | H  | 0.000 |       |
| H44                                                                                                      | -2.468500125 | 4.122640455  | 1.417430627  | dmol         | 1    | H  | 0.000 |       |
| H45                                                                                                      | -2.707576712 | -0.979963318 | 1.611586429  | dmol         | 1    | H  | 0.000 |       |
| <b>TS: 4HN<sub>2</sub>-c</b><br>→ <b>3HN<sub>2</sub>H-c</b><br>fe6n2hx2h2b3<br>btevj_1_4272.<br>25a.cmmf | 45           |              |              |              |      |    |       |       |
|                                                                                                          | C1           | 1.934688745  | 7.895476019  | 1.135496111  | dmol | 1  | C     | 0.000 |
|                                                                                                          | H2           | 2.858915586  | 7.555000631  | 0.648852914  | dmol | 1  | H     | 0.000 |
|                                                                                                          | H3           | 2.013556700  | 8.974628493  | 1.345637899  | dmol | 1  | H     | 0.000 |
|                                                                                                          | H4           | 1.816848512  | 7.354582695  | 2.083178574  | dmol | 1  | H     | 0.000 |
|                                                                                                          | S5           | 0.458182593  | 7.595449403  | 0.028579418  | dmol | 1  | S     | 0.000 |
|                                                                                                          | C6           | 1.025839688  | -3.593084467 | -3.133877255 | dmol | 1  | C     | 0.000 |
|                                                                                                          | H7           | 2.045408279  | -3.249659123 | -3.014970912 | dmol | 1  | H     | 0.000 |
|                                                                                                          | N8           | 0.075692505  | -3.302971173 | -2.172310578 | dmol | 1  | N     | 0.000 |
|                                                                                                          | C9           | 0.454621701  | -4.337653900 | -4.141613545 | dmol | 1  | C     | 0.000 |
|                                                                                                          | H10          | 0.852402192  | -4.761658746 | -5.055392460 | dmol | 1  | H     | 0.000 |
|                                                                                                          | C11          | -1.061574851 | -3.853035921 | -2.568388111 | dmol | 1  | C     | 0.000 |
|                                                                                                          | H12          | -1.991918159 | -3.812345980 | -2.016691248 | dmol | 1  | H     | 0.000 |
|                                                                                                          | N13          | -0.884180612 | -4.498526838 | -3.768683726 | dmol | 1  | N     | 0.000 |
|                                                                                                          | H14          | -1.605169833 | -4.976804770 | -4.295956148 | dmol | 1  | H     | 0.000 |
|                                                                                                          | C15          | -0.129788719 | -5.012824890 | 1.080089866  | dmol | 1  | C     | 0.000 |
|                                                                                                          | H16          | -0.594246672 | -6.001247217 | 0.888652391  | dmol | 1  | H     | 0.000 |
|                                                                                                          | H17          | -0.109531126 | -4.866463203 | 2.185012751  | dmol | 1  | H     | 0.000 |
|                                                                                                          | C18          | 1.348333416  | -5.059450727 | 0.624922320  | dmol | 1  | C     | 0.000 |
|                                                                                                          | O19          | 2.019336880  | -6.115691422 | 0.710654227  | dmol | 1  | O     | 0.000 |
|                                                                                                          | O20          | 1.786613109  | -3.913248760 | 0.182611320  | dmol | 1  | O     | 0.000 |
|                                                                                                          | O21          | -0.854710529 | -3.981121158 | 0.458199296  | dmol | 1  | O     | 0.000 |
|                                                                                                          | Fe22         | 0.243883075  | 5.268521054  | -0.009272157 | dmol | 1  | Fe    | 0.000 |
|                                                                                                          | Fe23         | -1.334721917 | 3.111361649  | 0.836359185  | dmol | 1  | Fe    | 0.000 |
| Fe24                                                                                                     | 1.378412811  | 2.792656380  | 0.998513041  | dmol         | 1    | Fe | 0.000 |       |

|                                                                 |      |              |              |              |      |   |    |       |
|-----------------------------------------------------------------|------|--------------|--------------|--------------|------|---|----|-------|
|                                                                 | Fe25 | 0.224711651  | 2.863430432  | -1.401922528 | dmol | 1 | Fe | 0.000 |
|                                                                 | Fe26 | 0.005756456  | 0.267245694  | -1.247145627 | dmol | 1 | Fe | 0.000 |
|                                                                 | Fe27 | -1.662784830 | -0.182968981 | 1.561051912  | dmol | 1 | Fe | 0.000 |
|                                                                 | Fe28 | 1.267151537  | 0.197385341  | 1.065564407  | dmol | 1 | Fe | 0.000 |
|                                                                 | Mo29 | 0.262359315  | -2.271418428 | -0.000691851 | dmol | 1 | Mo | 0.000 |
|                                                                 | S30  | -1.494143468 | 4.409454721  | -1.141231574 | dmol | 1 | S  | 0.000 |
|                                                                 | S31  | 0.046813761  | 4.322958794  | 2.154575256  | dmol | 1 | S  | 0.000 |
|                                                                 | S32  | 0.010966419  | 1.479253884  | -3.142717707 | dmol | 1 | S  | 0.000 |
|                                                                 | S33  | 2.089495129  | 4.074273984  | -0.858647224 | dmol | 1 | S  | 0.000 |
|                                                                 | S34  | -1.774909151 | -1.060893726 | -0.590522987 | dmol | 1 | S  | 0.000 |
|                                                                 | S35  | -3.153907481 | 1.524908822  | 0.936940520  | dmol | 1 | S  | 0.000 |
|                                                                 | S36  | 0.462164458  | -1.587827295 | 2.306949067  | dmol | 1 | S  | 0.000 |
|                                                                 | S37  | 1.986675864  | -0.849299664 | -0.915597395 | dmol | 1 | S  | 0.000 |
|                                                                 | S38  | 2.792323344  | 1.489134191  | 2.102737463  | dmol | 1 | S  | 0.000 |
|                                                                 | N39  | 0.064299751  | 1.648182922  | 0.202902459  | dmol | 1 | N  | 0.000 |
|                                                                 | N40  | -1.370571044 | 0.886086493  | 3.238165207  | dmol | 1 | N  | 0.000 |
|                                                                 | N41  | -1.756120459 | -0.222973571 | -3.651886783 | dmol | 1 | N  | 0.000 |
|                                                                 | H42  | -3.611833190 | 1.930549378  | 2.150862641  | dmol | 1 | H  | 0.000 |
|                                                                 | H43  | -0.946567846 | -0.928636272 | 3.706469454  | dmol | 1 | H  | 0.000 |
|                                                                 | H44  | -2.432079637 | 4.006501035  | 1.427309954  | dmol | 1 | H  | 0.000 |
|                                                                 | H45  | -2.756693952 | -1.207235499 | 1.763458434  | dmol | 1 | H  | 0.000 |
| <b>3HN<sub>2</sub>H-c</b><br>fe6n2hx2h2b3<br>btcvg_5a.cmm<br>f  | 45   |              |              |              |      |   |    |       |
|                                                                 | C1   | 1.925586183  | 7.904566040  | 1.040063692  | dmol | 1 | C  | 0.000 |
|                                                                 | H2   | 2.838253255  | 7.522991614  | 0.562202447  | dmol | 1 | H  | 0.000 |
|                                                                 | H3   | 2.035674098  | 8.987654237  | 1.214985073  | dmol | 1 | H  | 0.000 |
|                                                                 | H4   | 1.797709367  | 7.397937222  | 2.005709082  | dmol | 1 | H  | 0.000 |
|                                                                 | S5   | 0.434922542  | 7.609608900  | -0.050952266 | dmol | 1 | S  | 0.000 |
|                                                                 | C6   | 0.989551964  | -3.568269825 | -3.121385393 | dmol | 1 | C  | 0.000 |
|                                                                 | H7   | 1.997457545  | -3.183934186 | -3.023984816 | dmol | 1 | H  | 0.000 |
|                                                                 | N8   | 0.048716771  | -3.306231685 | -2.144149061 | dmol | 1 | N  | 0.000 |
|                                                                 | C9   | 0.426102283  | -4.332107890 | -4.119590747 | dmol | 1 | C  | 0.000 |
|                                                                 | H10  | 0.821285590  | -4.744024599 | -5.040308306 | dmol | 1 | H  | 0.000 |
|                                                                 | C11  | -1.075552586 | -3.888953346 | -2.521209970 | dmol | 1 | C  | 0.000 |
|                                                                 | H12  | -2.001058313 | -3.872058620 | -1.958760244 | dmol | 1 | H  | 0.000 |
|                                                                 | N13  | -0.900889944 | -4.533034733 | -3.724974053 | dmol | 1 | N  | 0.000 |
|                                                                 | H14  | -1.615388411 | -5.026957429 | -4.247043450 | dmol | 1 | H  | 0.000 |
|                                                                 | C15  | -0.163355847 | -4.942396611 | 1.101631296  | dmol | 1 | C  | 0.000 |
|                                                                 | H16  | -0.625040469 | -5.900687307 | 0.784147884  | dmol | 1 | H  | 0.000 |
|                                                                 | H17  | -0.155427883 | -4.950192418 | 2.217512018  | dmol | 1 | H  | 0.000 |
|                                                                 | C18  | 1.317899449  | -4.958898964 | 0.661685454  | dmol | 1 | C  | 0.000 |
|                                                                 | O19  | 2.009166116  | -5.997912609 | 0.751774824  | dmol | 1 | O  | 0.000 |
|                                                                 | O20  | 1.750054665  | -3.803127453 | 0.219539229  | dmol | 1 | O  | 0.000 |
|                                                                 | O21  | -0.882638164 | -3.846119536 | 0.603508098  | dmol | 1 | O  | 0.000 |
|                                                                 | Fe22 | 0.226552672  | 5.272912127  | -0.101819297 | dmol | 1 | Fe | 0.000 |
|                                                                 | Fe23 | -1.265516380 | 3.076443091  | 0.827322656  | dmol | 1 | Fe | 0.000 |
|                                                                 | Fe24 | 1.458774227  | 2.896883809  | 0.887756185  | dmol | 1 | Fe | 0.000 |
|                                                                 | Fe25 | 0.274168685  | 2.859172367  | -1.508959505 | dmol | 1 | Fe | 0.000 |
|                                                                 | Fe26 | 0.131795012  | 0.272290613  | -1.271221298 | dmol | 1 | Fe | 0.000 |
|                                                                 | Fe27 | -1.555819906 | -0.347640225 | 1.642297311  | dmol | 1 | Fe | 0.000 |
|                                                                 | Fe28 | 1.474045855  | 0.320252711  | 0.984071710  | dmol | 1 | Fe | 0.000 |
|                                                                 | Mo29 | 0.289702405  | -2.153377401 | 0.138725089  | dmol | 1 | Mo | 0.000 |
|                                                                 | S30  | -1.503178249 | 4.333737393  | -1.188112757 | dmol | 1 | S  | 0.000 |
|                                                                 | S31  | 0.091256465  | 4.352009290  | 2.086708974  | dmol | 1 | S  | 0.000 |
|                                                                 | S32  | 0.042807253  | 1.407528640  | -3.196136189 | dmol | 1 | S  | 0.000 |
|                                                                 | S33  | 2.102507155  | 4.150321038  | -1.006177862 | dmol | 1 | S  | 0.000 |
|                                                                 | S34  | -1.672381262 | -0.966887416 | -0.581269863 | dmol | 1 | S  | 0.000 |
|                                                                 | S35  | -3.014936617 | 1.419034963  | 1.021377346  | dmol | 1 | S  | 0.000 |
|                                                                 | S36  | 0.460041205  | -1.354521868 | 2.324655200  | dmol | 1 | S  | 0.000 |
|                                                                 | S37  | 2.066037394  | -0.870558066 | -0.914004919 | dmol | 1 | S  | 0.000 |
|                                                                 | S38  | 2.977019676  | 1.665835502  | 1.970545012  | dmol | 1 | S  | 0.000 |
|                                                                 | N39  | 0.207778715  | 1.687246435  | 0.124775158  | dmol | 1 | N  | 0.000 |
|                                                                 | N40  | -1.341720061 | 0.612502435  | 3.448368172  | dmol | 1 | N  | 0.000 |
|                                                                 | N41  | -2.208091326 | -0.290750504 | 3.613231620  | dmol | 1 | N  | 0.000 |
|                                                                 | H42  | -3.442358845 | 1.785531758  | 2.256989119  | dmol | 1 | H  | 0.000 |
|                                                                 | H43  | -1.840684441 | -1.146787685 | 4.104328350  | dmol | 1 | H  | 0.000 |
|                                                                 | H44  | -2.407445040 | 3.935995159  | 1.393353151  | dmol | 1 | H  | 0.000 |
|                                                                 | H45  | -2.523382805 | -1.485024969 | 1.732795848  | dmol | 1 | H  | 0.000 |
| <b>4HN<sub>2</sub>H-c</b><br>fe6n2hhx2b2h<br>3bptbu_2a.cm<br>mf | 46   |              |              |              |      |   |    |       |
|                                                                 | C1   | 1.653831393  | 8.108511215  | 0.898724434  | dmol | 1 | C  | 0.000 |
|                                                                 | H2   | 2.623657563  | 7.826617703  | 0.464606646  | dmol | 1 | H  | 0.000 |
|                                                                 | H3   | 1.608768284  | 9.205565219  | 0.995335102  | dmol | 1 | H  | 0.000 |
|                                                                 | H4   | 1.568679446  | 7.657149235  | 1.896258660  | dmol | 1 | H  | 0.000 |
|                                                                 | S5   | 0.246143570  | 7.531372132  | -0.193725922 | dmol | 1 | S  | 0.000 |
|                                                                 | C6   | 1.421174323  | -3.750272447 | -2.834590421 | dmol | 1 | C  | 0.000 |
|                                                                 | H7   | 2.424051468  | -3.414815954 | -2.602766302 | dmol | 1 | H  | 0.000 |
|                                                                 | N8   | 0.353671955  | -3.375012782 | -2.036321955 | dmol | 1 | N  | 0.000 |
|                                                                 | C9   | 0.976348843  | -4.548513995 | -3.864585357 | dmol | 1 | C  | 0.000 |



|                                                                                                         |              |              |              |              |      |    |       |       |
|---------------------------------------------------------------------------------------------------------|--------------|--------------|--------------|--------------|------|----|-------|-------|
|                                                                                                         | H10          | 1.487504783  | -5.040075125 | -4.683910138 | dmol | 1  | H     | 0.000 |
|                                                                                                         | C11          | -0.731178867 | -3.926897621 | -2.558616009 | dmol | 1  | C     | 0.000 |
|                                                                                                         | H12          | -1.731669303 | -3.818936232 | -2.161409165 | dmol | 1  | H     | 0.000 |
|                                                                                                         | N13          | -0.405390617 | -4.656896957 | -3.678054468 | dmol | 1  | N     | 0.000 |
|                                                                                                         | H14          | -1.055564589 | -5.158670460 | -4.271320626 | dmol | 1  | H     | 0.000 |
|                                                                                                         | C15          | -0.382072585 | -4.811672049 | 1.304883864  | dmol | 1  | C     | 0.000 |
|                                                                                                         | H16          | -0.859947627 | -5.785522268 | 1.074063157  | dmol | 1  | H     | 0.000 |
|                                                                                                         | H17          | -0.544112540 | -4.613438457 | 2.389838493  | dmol | 1  | H     | 0.000 |
|                                                                                                         | C18          | 1.149127953  | -4.948010029 | 1.117447789  | dmol | 1  | C     | 0.000 |
|                                                                                                         | O19          | 1.741147578  | -6.011117072 | 1.429126181  | dmol | 1  | O     | 0.000 |
|                                                                                                         | O20          | 1.709451957  | -3.869065179 | 0.646914939  | dmol | 1  | O     | 0.000 |
|                                                                                                         | O21          | -0.946269684 | -3.783758567 | 0.534208127  | dmol | 1  | O     | 0.000 |
|                                                                                                         | Fe22         | 0.395890718  | 5.291061708  | 0.063195160  | dmol | 1  | Fe    | 0.000 |
|                                                                                                         | Fe23         | -1.345338942 | 2.964617907  | 0.697619310  | dmol | 1  | Fe    | 0.000 |
|                                                                                                         | Fe24         | 1.441627042  | 2.875152259  | 0.961152427  | dmol | 1  | Fe    | 0.000 |
|                                                                                                         | Fe25         | 0.240017847  | 2.835155392  | -1.533741869 | dmol | 1  | Fe    | 0.000 |
|                                                                                                         | Fe26         | 0.214160160  | 0.265678357  | -1.322510482 | dmol | 1  | Fe    | 0.000 |
|                                                                                                         | Fe27         | -2.137278649 | -0.048115687 | 0.924609675  | dmol | 1  | Fe    | 0.000 |
|                                                                                                         | Fe28         | 1.397213322  | 0.252287126  | 0.961364611  | dmol | 1  | Fe    | 0.000 |
|                                                                                                         | Mo29         | 0.313891368  | -2.185930761 | 0.074186559  | dmol | 1  | Mo    | 0.000 |
|                                                                                                         | S30          | -1.370025687 | 4.443135494  | -1.013733289 | dmol | 1  | S     | 0.000 |
|                                                                                                         | S31          | 0.044853250  | 4.317972372  | 2.050910183  | dmol | 1  | S     | 0.000 |
|                                                                                                         | S32          | 0.175260184  | 1.452677409  | -3.259094874 | dmol | 1  | S     | 0.000 |
|                                                                                                         | S33          | 2.067705548  | 4.212257549  | -0.908156131 | dmol | 1  | S     | 0.000 |
|                                                                                                         | S34          | -1.625613899 | -1.092539927 | -0.946504174 | dmol | 1  | S     | 0.000 |
|                                                                                                         | S35          | -3.349636015 | 1.747118106  | 0.200188985  | dmol | 1  | S     | 0.000 |
|                                                                                                         | S36          | 0.483673232  | -1.379207959 | 2.484863199  | dmol | 1  | S     | 0.000 |
|                                                                                                         | S37          | 2.146833310  | -0.948282011 | -0.867887238 | dmol | 1  | S     | 0.000 |
|                                                                                                         | S38          | 2.951834456  | 1.571792054  | 1.935786994  | dmol | 1  | S     | 0.000 |
|                                                                                                         | N39          | 0.217151133  | 1.634987220  | 0.051835605  | dmol | 1  | N     | 0.000 |
|                                                                                                         | N40          | -1.549105208 | 0.713059139  | 2.471474869  | dmol | 1  | N     | 0.000 |
|                                                                                                         | N41          | -2.654318927 | 0.231074429  | 2.936472183  | dmol | 1  | N     | 0.000 |
|                                                                                                         | H42          | -3.216095185 | -1.093033725 | 1.000309753  | dmol | 1  | H     | 0.000 |
|                                                                                                         | H43          | -2.445075555 | -0.596105709 | 3.542987647  | dmol | 1  | H     | 0.000 |
|                                                                                                         | H44          | -3.914271891 | 2.000857537  | 1.413005254  | dmol | 1  | H     | 0.000 |
|                                                                                                         | H45          | -2.388005788 | 3.830774066  | 1.412005716  | dmol | 1  | H     | 0.000 |
|                                                                                                         | H46          | 1.597301073  | -2.112982658 | 2.803552898  | dmol | 1  | H     | 0.000 |
| <b>TS: 4HN<sub>2</sub>H-c<br/>→ 4HN<sub>2</sub>H-d<br/>fe6n2hxx2b2h<br/>3bptcu_3_430<br/>1.70a.cmmf</b> | 46           |              |              |              |      |    |       |       |
|                                                                                                         | C1           | 1.623904856  | 8.109928918  | 0.845214412  | dmol | 1  | C     | 0.000 |
|                                                                                                         | H2           | 2.591988741  | 7.822085303  | 0.413499877  | dmol | 1  | H     | 0.000 |
|                                                                                                         | H3           | 1.579051368  | 9.207246920  | 0.938255303  | dmol | 1  | H     | 0.000 |
|                                                                                                         | H4           | 1.533161013  | 7.659861152  | 1.841581669  | dmol | 1  | H     | 0.000 |
|                                                                                                         | S5           | 0.209621819  | 7.522277657  | -0.237879160 | dmol | 1  | S     | 0.000 |
|                                                                                                         | C6           | 1.400006364  | -3.776890246 | -2.910328485 | dmol | 1  | C     | 0.000 |
|                                                                                                         | H7           | 2.401287153  | -3.436898991 | -2.678282056 | dmol | 1  | H     | 0.000 |
|                                                                                                         | N8           | 0.344819018  | -3.404234368 | -2.098415676 | dmol | 1  | N     | 0.000 |
|                                                                                                         | C9           | 0.933252465  | -4.567186236 | -3.934057018 | dmol | 1  | C     | 0.000 |
|                                                                                                         | H10          | 1.435816253  | -5.056266607 | -4.758340551 | dmol | 1  | H     | 0.000 |
|                                                                                                         | C11          | -0.756710961 | -3.950218103 | -2.597685654 | dmol | 1  | C     | 0.000 |
|                                                                                                         | H12          | -1.745307678 | -3.838368636 | -2.171661568 | dmol | 1  | H     | 0.000 |
|                                                                                                         | N13          | -0.446406653 | -4.672899239 | -3.725950241 | dmol | 1  | N     | 0.000 |
|                                                                                                         | H14          | -1.110205448 | -5.162449084 | -4.312537729 | dmol | 1  | H     | 0.000 |
|                                                                                                         | C15          | -0.392430173 | -4.864397753 | 1.251899671  | dmol | 1  | C     | 0.000 |
|                                                                                                         | H16          | -0.880531451 | -5.845708360 | 1.069665857  | dmol | 1  | H     | 0.000 |
|                                                                                                         | H17          | -0.558635230 | -4.638536647 | 2.334978248  | dmol | 1  | H     | 0.000 |
|                                                                                                         | C18          | 1.137516371  | -5.039768917 | 1.077615920  | dmol | 1  | C     | 0.000 |
|                                                                                                         | O19          | 1.705748460  | -6.095804893 | 1.451086733  | dmol | 1  | O     | 0.000 |
|                                                                                                         | O20          | 1.724691546  | -4.005596774 | 0.542778047  | dmol | 1  | O     | 0.000 |
|                                                                                                         | O21          | -0.928935082 | -3.864831468 | 0.429903992  | dmol | 1  | O     | 0.000 |
|                                                                                                         | Fe22         | 0.393068611  | 5.302826155  | -0.046960593 | dmol | 1  | Fe    | 0.000 |
| Fe23                                                                                                    | -1.296458786 | 2.923893425  | 0.852776564  | dmol         | 1    | Fe | 0.000 |       |
| Fe24                                                                                                    | 1.383963590  | 2.911953554  | 0.848962369  | dmol         | 1    | Fe | 0.000 |       |
| Fe25                                                                                                    | 0.248273105  | 2.835625118  | -1.505289292 | dmol         | 1    | Fe | 0.000 |       |
| Fe26                                                                                                    | 0.197025881  | 0.216221875  | -1.407705882 | dmol         | 1    | Fe | 0.000 |       |
| Fe27                                                                                                    | -1.763541750 | -0.005710384 | 1.221573122  | dmol         | 1    | Fe | 0.000 |       |
| Fe28                                                                                                    | 1.583530912  | 0.316895926  | 0.831592521  | dmol         | 1    | Fe | 0.000 |       |
| Mo29                                                                                                    | 0.410669101  | -2.306393121 | -0.114609427 | dmol         | 1    | Mo | 0.000 |       |
| S30                                                                                                     | -1.428658646 | 4.370958487  | -0.967371117 | dmol         | 1    | S  | 0.000 |       |
| S31                                                                                                     | 0.099726609  | 4.409328540  | 1.987922153  | dmol         | 1    | S  | 0.000 |       |
| S32                                                                                                     | 0.198367925  | 1.492577330  | -3.287947839 | dmol         | 1    | S  | 0.000 |       |
| S33                                                                                                     | 2.083137975  | 4.234403274  | -0.949543994 | dmol         | 1    | S  | 0.000 |       |
| S34                                                                                                     | -1.598771768 | -1.105835471 | -0.852058767 | dmol         | 1    | S  | 0.000 |       |
| S35                                                                                                     | -3.192973961 | 1.590928758  | 0.351834672  | dmol         | 1    | S  | 0.000 |       |
| S36                                                                                                     | 0.215140235  | -1.153005155 | 2.037743931  | dmol         | 1    | S  | 0.000 |       |
| S37                                                                                                     | 2.214539704  | -0.968365527 | -1.009299786 | dmol         | 1    | S  | 0.000 |       |
| S38                                                                                                     | 3.042300806  | 1.730276633  | 1.759360657  | dmol         | 1    | S  | 0.000 |       |
| N39                                                                                                     | 0.178969681  | 1.603543222  | 0.063412621  | dmol         | 1    | N  | 0.000 |       |
| N40                                                                                                     | -1.432490744 | 1.059245074  | 2.902067708  | dmol         | 1    | N  | 0.000 |       |

|                                                                                                               |              |              |              |              |      |   |       |       |
|---------------------------------------------------------------------------------------------------------------|--------------|--------------|--------------|--------------|------|---|-------|-------|
|                                                                                                               | N41          | -2.446942265 | 0.305440640  | 3.086459107  | dmol | 1 | N     | 0.000 |
|                                                                                                               | H42          | -2.704831279 | -1.192769588 | 1.361155995  | dmol | 1 | H     | 0.000 |
|                                                                                                               | H43          | -2.261303318 | -0.527978551 | 3.696751158  | dmol | 1 | H     | 0.000 |
|                                                                                                               | H44          | -3.797465512 | 1.815286247  | 1.547007830  | dmol | 1 | H     | 0.000 |
|                                                                                                               | H45          | -2.379497001 | 3.762766711  | 1.535891604  | dmol | 1 | H     | 0.000 |
|                                                                                                               | H46          | 0.252518138  | -1.723456797 | 3.284933093  | dmol | 1 | H     | 0.000 |
| <b>4HN<sub>2</sub>H-d</b><br>fe6n2hhx2b2h<br>3bto2u_2a.cm<br>mf                                               | 46           |              |              |              |      |   |       |       |
|                                                                                                               | C1           | 1.619925713  | 8.139541758  | 0.963352702  | dmol | 1 | C     | 0.000 |
|                                                                                                               | H2           | 2.579618285  | 7.848791104  | 0.512686826  | dmol | 1 | H     | 0.000 |
|                                                                                                               | H3           | 1.569598404  | 9.239891366  | 1.011869901  | dmol | 1 | H     | 0.000 |
|                                                                                                               | H4           | 1.570594604  | 7.733823125  | 1.983981275  | dmol | 1 | H     | 0.000 |
|                                                                                                               | S5           | 0.189961607  | 7.517688443  | -0.076334020 | dmol | 1 | S     | 0.000 |
|                                                                                                               | C6           | 1.434242697  | -3.761787428 | -2.835749031 | dmol | 1 | C     | 0.000 |
|                                                                                                               | H7           | 2.433673878  | -3.417241707 | -2.603524795 | dmol | 1 | H     | 0.000 |
|                                                                                                               | N8           | 0.370075095  | -3.410742503 | -2.023129542 | dmol | 1 | N     | 0.000 |
|                                                                                                               | C9           | 0.987332374  | -4.547090908 | -3.873242149 | dmol | 1 | C     | 0.000 |
|                                                                                                               | H10          | 1.497288000  | -5.015607157 | -4.706030362 | dmol | 1 | H     | 0.000 |
|                                                                                                               | C11          | -0.714273544 | -3.968940820 | -2.539339977 | dmol | 1 | C     | 0.000 |
|                                                                                                               | H12          | -1.711614365 | -3.874887291 | -2.130587739 | dmol | 1 | H     | 0.000 |
|                                                                                                               | N13          | -0.390605981 | -4.678800029 | -3.672361388 | dmol | 1 | N     | 0.000 |
|                                                                                                               | H14          | -1.044101499 | -5.161048888 | -4.277506960 | dmol | 1 | H     | 0.000 |
|                                                                                                               | C15          | -0.215740450 | -4.876788371 | 1.311762063  | dmol | 1 | C     | 0.000 |
|                                                                                                               | H16          | -0.694767480 | -5.843638711 | 1.048375107  | dmol | 1 | H     | 0.000 |
|                                                                                                               | H17          | -0.334673485 | -4.745394749 | 2.412555301  | dmol | 1 | H     | 0.000 |
|                                                                                                               | C18          | 1.307042915  | -5.001824369 | 1.048495934  | dmol | 1 | C     | 0.000 |
|                                                                                                               | O19          | 1.913332891  | -6.064656605 | 1.330534996  | dmol | 1 | O     | 0.000 |
|                                                                                                               | O20          | 1.840174800  | -3.929118538 | 0.537098799  | dmol | 1 | O     | 0.000 |
|                                                                                                               | O21          | -0.814327454 | -3.813182589 | 0.616317465  | dmol | 1 | O     | 0.000 |
|                                                                                                               | Fe22         | 0.433911070  | 5.272574423  | 0.074548434  | dmol | 1 | Fe    | 0.000 |
|                                                                                                               | Fe23         | -1.236355320 | 2.932246368  | 0.692956959  | dmol | 1 | Fe    | 0.000 |
|                                                                                                               | Fe24         | 1.501608853  | 2.875832109  | 0.923012034  | dmol | 1 | Fe    | 0.000 |
|                                                                                                               | Fe25         | 0.245323847  | 2.795970843  | -1.524709428 | dmol | 1 | Fe    | 0.000 |
|                                                                                                               | Fe26         | 0.180633307  | 0.211519215  | -1.302885204 | dmol | 1 | Fe    | 0.000 |
|                                                                                                               | Fe27         | -2.222745830 | -0.138084967 | 0.978837235  | dmol | 1 | Fe    | 0.000 |
|                                                                                                               | Fe28         | 1.574548055  | 0.270363527  | 0.876258596  | dmol | 1 | Fe    | 0.000 |
|                                                                                                               | Mo29         | 0.424770222  | -2.242812973 | 0.054333691  | dmol | 1 | Mo    | 0.000 |
|                                                                                                               | S30          | -1.337120476 | 4.410594146  | -0.983941505 | dmol | 1 | S     | 0.000 |
|                                                                                                               | S31          | 0.121229950  | 4.274137951  | 2.059910676  | dmol | 1 | S     | 0.000 |
|                                                                                                               | S32          | 0.060577790  | 1.416637689  | -3.237064644 | dmol | 1 | S     | 0.000 |
|                                                                                                               | S33          | 2.069357284  | 4.203179769  | -0.988548382 | dmol | 1 | S     | 0.000 |
|                                                                                                               | S34          | -1.608997554 | -1.196604711 | -0.855216615 | dmol | 1 | S     | 0.000 |
| S35                                                                                                           | -3.215141970 | 1.738391172  | 0.172097134  | dmol         | 1    | S | 0.000 |       |
| S36                                                                                                           | 0.980755296  | -1.497289505 | 2.400116835  | dmol         | 1    | S | 0.000 |       |
| S37                                                                                                           | 2.172743031  | -0.945071732 | -1.007751995 | dmol         | 1    | S | 0.000 |       |
| S38                                                                                                           | 3.068660543  | 1.639381525  | 1.879443128  | dmol         | 1    | S | 0.000 |       |
| N39                                                                                                           | 0.286670678  | 1.617669585  | 0.046569625  | dmol         | 1    | N | 0.000 |       |
| N40                                                                                                           | -1.566195236 | 0.403310556  | 2.577674340  | dmol         | 1    | N | 0.000 |       |
| N41                                                                                                           | -2.777580033 | 0.193283948  | 2.998216056  | dmol         | 1    | N | 0.000 |       |
| H42                                                                                                           | -3.463362304 | -1.021626192 | 0.903290635  | dmol         | 1    | H | 0.000 |       |
| H43                                                                                                           | -2.804651808 | -0.659490331 | 3.603519609  | dmol         | 1    | H | 0.000 |       |
| H44                                                                                                           | -3.939222007 | 2.070319499  | 1.278666831  | dmol         | 1    | H | 0.000 |       |
| H45                                                                                                           | -2.281576726 | 3.751718072  | 1.451617019  | dmol         | 1    | H | 0.000 |       |
| H46                                                                                                           | -0.060597350 | -0.745134922 | 2.889825437  | dmol         | 1    | H | 0.000 |       |
| <b>TS: 4HN<sub>2</sub>H-d</b><br>→ 3HN <sub>2</sub> H <sub>2</sub> -a<br>fe6n2hhx2b2h<br>3btuv_origa.c<br>mmf | 45           |              |              |              |      |   |       |       |
|                                                                                                               | C1           | 1.298264     | 6.476746     | 0.948166     | dmol | 1 | C     | 0.000 |
|                                                                                                               | H2           | 2.278305     | 6.195511     | 0.542023     | dmol | 1 | H     | 0.000 |
|                                                                                                               | H3           | 1.247269     | 7.572037     | 1.057709     | dmol | 1 | H     | 0.000 |
|                                                                                                               | H4           | 1.174011     | 6.008652     | 1.932053     | dmol | 1 | H     | 0.000 |
|                                                                                                               | S5           | -0.074371    | 5.897415     | -0.189163    | dmol | 1 | S     | 0.000 |
|                                                                                                               | C6           | 1.305389     | -5.365219    | -2.865494    | dmol | 1 | C     | 0.000 |
|                                                                                                               | H7           | 2.292526     | -5.024521    | -2.579605    | dmol | 1 | H     | 0.000 |
|                                                                                                               | N8           | 0.198730     | -4.982712    | -2.129532    | dmol | 1 | N     | 0.000 |
|                                                                                                               | C9           | 0.914307     | -6.170349    | -3.910446    | dmol | 1 | C     | 0.000 |
|                                                                                                               | H10          | 1.467163     | -6.673828    | -4.694200    | dmol | 1 | H     | 0.000 |
|                                                                                                               | C11          | -0.859848    | -5.536804    | -2.700180    | dmol | 1 | C     | 0.000 |
|                                                                                                               | H12          | -1.878677    | -5.425018    | -2.352386    | dmol | 1 | H     | 0.000 |
|                                                                                                               | N13          | -0.476746    | -6.274658    | -3.795959    | dmol | 1 | N     | 0.000 |
|                                                                                                               | H14          | -1.096771    | -6.777786    | -4.419342    | dmol | 1 | H     | 0.000 |
|                                                                                                               | C15          | -0.746918    | -6.382385    | 1.176208     | dmol | 1 | C     | 0.000 |
|                                                                                                               | H16          | -1.244751    | -7.344131    | 0.937561     | dmol | 1 | H     | 0.000 |
|                                                                                                               | H17          | -0.959442    | -6.162415    | 2.247559     | dmol | 1 | H     | 0.000 |
|                                                                                                               | C18          | 0.783234     | -6.574524    | 1.068054     | dmol | 1 | C     | 0.000 |
|                                                                                                               | O19          | 1.320175     | -7.638657    | 1.461166     | dmol | 1 | O     | 0.000 |
|                                                                                                               | O20          | 1.403793     | -5.547287    | 0.557587     | dmol | 1 | O     | 0.000 |
|                                                                                                               | O21          | -1.235900    | -5.353256    | 0.359955     | dmol | 1 | O     | 0.000 |
|                                                                                                               | Fe22         | 0.078064     | 3.670425     | -0.055710    | dmol | 1 | Fe    | 0.000 |
|                                                                                                               | Fe23         | -1.620422    | 1.317612     | 0.560532     | dmol | 1 | Fe    | 0.000 |

|                                                                            |              |              |              |              |      |   |       |       |
|----------------------------------------------------------------------------|--------------|--------------|--------------|--------------|------|---|-------|-------|
|                                                                            | Fe24         | 1.162170     | 1.236542     | 0.961456     | dmol | 1 | Fe    | 0.000 |
|                                                                            | Fe25         | 0.003189     | 1.251129     | -1.567093    | dmol | 1 | Fe    | 0.000 |
|                                                                            | Fe26         | -0.028061    | -1.339386    | -1.394608    | dmol | 1 | Fe    | 0.000 |
|                                                                            | Fe27         | -2.428986    | -1.759796    | 0.836105     | dmol | 1 | Fe    | 0.000 |
|                                                                            | Fe28         | 1.242889     | -1.382400    | 0.961868     | dmol | 1 | Fe    | 0.000 |
|                                                                            | Mo29         | 0.113571     | -3.804000    | -0.044968    | dmol | 1 | Mo    | 0.000 |
|                                                                            | S30          | -1.679626    | 2.803970     | -1.146652    | dmol | 1 | S     | 0.000 |
|                                                                            | S31          | -0.313812    | 2.724686     | 1.927917     | dmol | 1 | S     | 0.000 |
|                                                                            | S32          | 0.005890     | -0.125198    | -3.314636    | dmol | 1 | S     | 0.000 |
|                                                                            | S33          | 1.867600     | 2.624466     | -0.823273    | dmol | 1 | S     | 0.000 |
|                                                                            | S34          | -1.850418    | -2.724716    | -1.077271    | dmol | 1 | S     | 0.000 |
|                                                                            | S35          | -3.549988    | 0.030930     | 0.091690     | dmol | 1 | S     | 0.000 |
|                                                                            | S36          | 0.351547     | -3.092957    | 2.316452     | dmol | 1 | S     | 0.000 |
|                                                                            | S37          | 1.964400     | -2.529968    | -0.953690    | dmol | 1 | S     | 0.000 |
|                                                                            | S38          | 2.614868     | 0.008209     | 2.095963     | dmol | 1 | S     | 0.000 |
|                                                                            | N39          | 0.000000     | 0.000000     | 0.000000     | dmol | 1 | N     | 0.000 |
|                                                                            | N40          | -1.785034    | -1.102875    | 2.494202     | dmol | 1 | N     | 0.000 |
|                                                                            | N41          | -2.994400    | -1.495895    | 2.806473     | dmol | 1 | N     | 0.000 |
|                                                                            | H42          | -3.482742    | -2.843094    | 0.852966     | dmol | 1 | H     | 0.000 |
|                                                                            | H43          | -2.987961    | -2.381195    | 3.360733     | dmol | 1 | H     | 0.000 |
|                                                                            | H44          | -4.206985    | 0.348694     | 1.242920     | dmol | 1 | H     | 0.000 |
|                                                                            | H45          | -2.706360    | 2.161224     | 1.227982     | dmol | 1 | H     | 0.000 |
|                                                                            | H46          | -0.672180    | -2.080154    | 2.715210     | dmol | 1 | H     | 0.000 |
| <b>3HN<sub>2</sub>H<sub>2</sub>-a</b><br>fe6n2hxx2b2h<br>3btuu_7a.cmm<br>f | 46           |              |              |              |      |   |       |       |
|                                                                            | C1           | 1.639305047  | 8.085925847  | 1.043785502  | dmol | 1 | C     | 0.000 |
|                                                                            | H2           | 2.586796469  | 7.753286256  | 0.598959538  | dmol | 1 | H     | 0.000 |
|                                                                            | H3           | 1.592126998  | 9.186560039  | 1.011878099  | dmol | 1 | H     | 0.000 |
|                                                                            | H4           | 1.603994913  | 7.758790519  | 2.091559992  | dmol | 1 | H     | 0.000 |
|                                                                            | S5           | 0.180976079  | 7.392906898  | 0.093546999  | dmol | 1 | S     | 0.000 |
|                                                                            | C6           | 1.626095651  | -3.867192648 | -2.950981085 | dmol | 1 | C     | 0.000 |
|                                                                            | H7           | 2.613923850  | -3.503963069 | -2.695710583 | dmol | 1 | H     | 0.000 |
|                                                                            | N8           | 0.544469173  | -3.561900547 | -2.146315929 | dmol | 1 | N     | 0.000 |
|                                                                            | C9           | 1.210810743  | -4.635864929 | -4.015359644 | dmol | 1 | C     | 0.000 |
|                                                                            | H10          | 1.739053839  | -5.078246958 | -4.851121707 | dmol | 1 | H     | 0.000 |
|                                                                            | C11          | -0.520586643 | -4.126619556 | -2.691158355 | dmol | 1 | C     | 0.000 |
|                                                                            | H12          | -1.522292755 | -4.073968568 | -2.284041650 | dmol | 1 | H     | 0.000 |
|                                                                            | N13          | -0.167740028 | -4.797575519 | -3.837907916 | dmol | 1 | N     | 0.000 |
|                                                                            | H14          | -0.804426867 | -5.271231448 | -4.467691239 | dmol | 1 | H     | 0.000 |
|                                                                            | C15          | -0.306572997 | -4.998221707 | 1.196382161  | dmol | 1 | C     | 0.000 |
|                                                                            | H16          | -0.701725835 | -6.012748730 | 0.982309251  | dmol | 1 | H     | 0.000 |
|                                                                            | H17          | -0.555397846 | -4.774171995 | 2.261690717  | dmol | 1 | H     | 0.000 |
|                                                                            | C18          | 1.237017565  | -5.053439528 | 1.121756095  | dmol | 1 | C     | 0.000 |
|                                                                            | O19          | 1.869515116  | -6.061431125 | 1.515562369  | dmol | 1 | O     | 0.000 |
|                                                                            | O20          | 1.772888826  | -3.963564885 | 0.634447610  | dmol | 1 | O     | 0.000 |
|                                                                            | O21          | -0.863568868 | -4.047535314 | 0.330790801  | dmol | 1 | O     | 0.000 |
|                                                                            | Fe22         | 0.442940570  | 5.171176554  | 0.219852176  | dmol | 1 | Fe    | 0.000 |
|                                                                            | Fe23         | -1.512027225 | 2.800892065  | 0.970612401  | dmol | 1 | Fe    | 0.000 |
|                                                                            | Fe24         | 1.344565689  | 2.668326544  | 1.071956835  | dmol | 1 | Fe    | 0.000 |
|                                                                            | Fe25         | 0.247252151  | 2.752275866  | -1.300396798 | dmol | 1 | Fe    | 0.000 |
|                                                                            | Fe26         | 0.217566912  | 0.144812037  | -1.396642321 | dmol | 1 | Fe    | 0.000 |
|                                                                            | Fe27         | -1.762413028 | 0.050680355  | 0.981425920  | dmol | 1 | Fe    | 0.000 |
|                                                                            | Fe28         | 1.381998135  | 0.045863281  | 1.074452666  | dmol | 1 | Fe    | 0.000 |
|                                                                            | Mo29         | 0.373124008  | -2.367044979 | -0.028833151 | dmol | 1 | Mo    | 0.000 |
|                                                                            | S30          | -1.370907955 | 4.352566426  | -0.827354315 | dmol | 1 | S     | 0.000 |
|                                                                            | S31          | 0.025565828  | 4.196287610  | 2.171358188  | dmol | 1 | S     | 0.000 |
|                                                                            | S32          | 0.254227117  | 1.527893482  | -3.175042816 | dmol | 1 | S     | 0.000 |
|                                                                            | S33          | 2.126102162  | 4.046411302  | -0.645846854 | dmol | 1 | S     | 0.000 |
|                                                                            | S34          | -1.575481626 | -1.243725376 | -0.986919168 | dmol | 1 | S     | 0.000 |
| S35                                                                        | -3.255562907 | 1.584553022  | -0.060300951 | dmol         | 1    | S | 0.000 |       |
| S36                                                                        | -0.111375100 | -1.372043251 | 2.117650672  | dmol         | 1    | S | 0.000 |       |
| S37                                                                        | 2.216378352  | -1.002400041 | -0.844839218 | dmol         | 1    | S | 0.000 |       |
| S38                                                                        | 2.713224731  | 1.387754223  | 2.293998265  | dmol         | 1    | S | 0.000 |       |
| N39                                                                        | 0.143516717  | 1.424184049  | 0.143846266  | dmol         | 1    | N | 0.000 |       |
| N40                                                                        | -1.564331470 | 1.443407939  | 2.400791807  | dmol         | 1    | N | 0.000 |       |
| N41                                                                        | -2.620970555 | 0.639739814  | 2.737951291  | dmol         | 1    | N | 0.000 |       |
| H42                                                                        | -2.763741728 | -1.058561565 | 1.206595410  | dmol         | 1    | H | 0.000 |       |
| H43                                                                        | -2.262345475 | -0.055237920 | 3.417530899  | dmol         | 1    | H | 0.000 |       |
| H44                                                                        | -4.117921035 | 1.631002564  | 0.988595034  | dmol         | 1    | H | 0.000 |       |
| H45                                                                        | -2.638978462 | 3.621121621  | 1.587895414  | dmol         | 1    | H | 0.000 |       |
| H46                                                                        | -0.705068071 | 1.260271344  | 2.939281320  | dmol         | 1    | H | 0.000 |       |
| Fig 6                                                                      |              |              |              |              |      |   |       |       |
| <b>3HN<sub>2</sub>H<sub>2</sub>-a</b>                                      | 46           |              |              |              |      |   |       |       |
|                                                                            | C1           | 1.488702723  | 8.216159705  | 0.623565643  | dmol | 1 | C     | 0.000 |
|                                                                            | H2           | 2.469930288  | 7.980472901  | 0.188908913  | dmol | 1 | H     | 0.000 |

|                                     |                                                                                                                                      |              |              |              |             |      |       |       |       |
|-------------------------------------|--------------------------------------------------------------------------------------------------------------------------------------|--------------|--------------|--------------|-------------|------|-------|-------|-------|
| fe626n2h26x2<br>x2btgas_2a.cm<br>mf | H3                                                                                                                                   | 1.350844068  | 9.309935264  | 0.623144663  | dmol        | 1    | H     | 0.000 |       |
|                                     | H4                                                                                                                                   | 1.462938312  | 7.854681291  | 1.659839414  | dmol        | 1    | H     | 0.000 |       |
|                                     | S5                                                                                                                                   | 0.109255859  | 7.435154531  | -0.376128633 | dmol        | 1    | S     | 0.000 |       |
|                                     | C6                                                                                                                                   | 1.469417008  | -3.841823901 | -3.031455291 | dmol        | 1    | C     | 0.000 |       |
|                                     | H7                                                                                                                                   | 2.433930135  | -3.356963098 | -2.943624106 | dmol        | 1    | H     | 0.000 |       |
|                                     | N8                                                                                                                                   | 0.497589548  | -3.645634010 | -2.066561696 | dmol        | 1    | N     | 0.000 |       |
|                                     | C9                                                                                                                                   | 0.989679912  | -4.682374364 | -4.011435529 | dmol        | 1    | C     | 0.000 |       |
|                                     | H10                                                                                                                                  | 1.431568547  | -5.083056752 | -4.916059452 | dmol        | 1    | H     | 0.000 |       |
|                                     | C11                                                                                                                                  | -0.564826273 | -4.342906243 | -2.437319453 | dmol        | 1    | C     | 0.000 |       |
|                                     | H12                                                                                                                                  | -1.483832952 | -4.403027625 | -1.867736572 | dmol        | 1    | H     | 0.000 |       |
|                                     | N13                                                                                                                                  | -0.315384832 | -4.998498690 | -3.619689732 | dmol        | 1    | N     | 0.000 |       |
|                                     | H14                                                                                                                                  | -0.978769354 | -5.563214040 | -4.136920897 | dmol        | 1    | H     | 0.000 |       |
|                                     | C15                                                                                                                                  | -0.156787013 | -5.030996917 | 1.319363273  | dmol        | 1    | C     | 0.000 |       |
|                                     | H16                                                                                                                                  | -0.494362367 | -6.057855474 | 1.064285234  | dmol        | 1    | H     | 0.000 |       |
|                                     | H17                                                                                                                                  | -0.426979044 | -4.864310785 | 2.388611817  | dmol        | 1    | H     | 0.000 |       |
|                                     | C18                                                                                                                                  | 1.389265615  | -5.006314501 | 1.256928674  | dmol        | 1    | C     | 0.000 |       |
|                                     | O19                                                                                                                                  | 2.063604878  | -5.975624115 | 1.679380466  | dmol        | 1    | O     | 0.000 |       |
|                                     | O20                                                                                                                                  | 1.871961534  | -3.904436786 | 0.750566864  | dmol        | 1    | O     | 0.000 |       |
|                                     | O21                                                                                                                                  | -0.762453715 | -4.075365317 | 0.490249145  | dmol        | 1    | O     | 0.000 |       |
|                                     | Fe22                                                                                                                                 | 0.305180844  | 5.216779150  | -0.089252363 | dmol        | 1    | Fe    | 0.000 |       |
|                                     | Fe23                                                                                                                                 | -1.497339925 | 2.846003969  | 1.044092893  | dmol        | 1    | Fe    | 0.000 |       |
|                                     | Fe24                                                                                                                                 | 1.344223007  | 2.748506997  | 0.879458381  | dmol        | 1    | Fe    | 0.000 |       |
|                                     | Fe25                                                                                                                                 | 0.129903186  | 2.653819634  | -1.468714435 | dmol        | 1    | Fe    | 0.000 |       |
|                                     | Fe26                                                                                                                                 | 0.166005696  | 0.094502785  | -1.378164757 | dmol        | 1    | Fe    | 0.000 |       |
|                                     | Fe27                                                                                                                                 | -1.646226069 | 0.082380713  | 1.150502085  | dmol        | 1    | Fe    | 0.000 |       |
|                                     | Fe28                                                                                                                                 | 1.434735134  | 0.164694533  | 0.918221409  | dmol        | 1    | Fe    | 0.000 |       |
|                                     | Mo29                                                                                                                                 | 0.417469253  | -2.379186489 | 0.034854038  | dmol        | 1    | Mo    | 0.000 |       |
|                                     | S30                                                                                                                                  | -1.497559938 | 4.210673911  | -0.946875384 | dmol        | 1    | S     | 0.000 |       |
|                                     | S31                                                                                                                                  | 0.059164004  | 4.323421188  | 1.951072639  | dmol        | 1    | S     | 0.000 |       |
|                                     | S32                                                                                                                                  | 0.024076543  | 1.316514045  | -3.250294017 | dmol        | 1    | S     | 0.000 |       |
|                                     | S33                                                                                                                                  | 1.940909774  | 4.049918364  | -0.969852931 | dmol        | 1    | S     | 0.000 |       |
|                                     | S34                                                                                                                                  | -1.596192536 | -1.287211281 | -0.793531953 | dmol        | 1    | S     | 0.000 |       |
|                                     | S35                                                                                                                                  | -3.291198033 | 1.559295209  | 0.221909886  | dmol        | 1    | S     | 0.000 |       |
|                                     | S36                                                                                                                                  | 0.106578212  | -1.282618838 | 2.162309179  | dmol        | 1    | S     | 0.000 |       |
|                                     | S37                                                                                                                                  | 2.173008841  | -1.010875641 | -0.939449795 | dmol        | 1    | S     | 0.000 |       |
|                                     | S38                                                                                                                                  | 2.822587990  | 1.538284923  | 2.032587265  | dmol        | 1    | S     | 0.000 |       |
|                                     | N39                                                                                                                                  | 0.096381094  | 1.419451469  | 0.105072372  | dmol        | 1    | N     | 0.000 |       |
|                                     | N40                                                                                                                                  | -1.371478005 | 1.515627490  | 2.517332229  | dmol        | 1    | N     | 0.000 |       |
|                                     | N41                                                                                                                                  | -2.366287766 | 0.690905790  | 2.968256492  | dmol        | 1    | N     | 0.000 |       |
|                                     | H42                                                                                                                                  | -0.456740273 | 1.362309111  | 2.967724582  | dmol        | 1    | H     | 0.000 |       |
|                                     | H43                                                                                                                                  | -1.924883215 | 0.024933201  | 3.628530018  | dmol        | 1    | H     | 0.000 |       |
|                                     | H44                                                                                                                                  | -2.570418671 | 3.642137434  | 1.770585028  | dmol        | 1    | H     | 0.000 |       |
|                                     | H45                                                                                                                                  | -4.043023358 | 1.570541346  | 1.356006878  | dmol        | 1    | H     | 0.000 |       |
|                                     | H46                                                                                                                                  | -2.604168743 | -1.034810086 | 1.489707519  | dmol        | 1    | H     | 0.000 |       |
|                                     | TS: 3HN <sub>2</sub> H <sub>2</sub> -<br>a<br>→ 2HN <sub>2</sub> H <sub>3</sub> -<br>b<br>fe626n2h26x2<br>x2btg9_1_434<br>5.66a.cmmf | 46           |              |              |             |      |       |       |       |
|                                     |                                                                                                                                      | C1           | 1.459522098  | 8.224948427  | 0.625412525 | dmol | 1     | C     | 0.000 |
| H2                                  |                                                                                                                                      | 2.420343712  | 7.981107513  | 0.152264569  | dmol        | 1    | H     | 0.000 |       |
| H3                                  |                                                                                                                                      | 1.324665548  | 9.319134115  | 0.619931621  | dmol        | 1    | H     | 0.000 |       |
| H4                                  |                                                                                                                                      | 1.477620805  | 7.873669243  | 1.665894033  | dmol        | 1    | H     | 0.000 |       |
| S5                                  |                                                                                                                                      | 0.044569395  | 7.439573342  | -0.317842518 | dmol        | 1    | S     | 0.000 |       |
| C6                                  |                                                                                                                                      | 1.483333443  | -3.898601040 | -2.992900967 | dmol        | 1    | C     | 0.000 |       |
| H7                                  |                                                                                                                                      | 2.463412735  | -3.452199784 | -2.878572142 | dmol        | 1    | H     | 0.000 |       |
| N8                                  |                                                                                                                                      | 0.491429446  | -3.656925417 | -2.059623363 | dmol        | 1    | N     | 0.000 |       |
| C9                                  |                                                                                                                                      | 1.000726479  | -4.728864635 | -3.980174731 | dmol        | 1    | C     | 0.000 |       |
| H10                                 |                                                                                                                                      | 1.451802924  | -5.150417054 | -4.870542701 | dmol        | 1    | H     | 0.000 |       |
| C11                                 |                                                                                                                                      | -0.584668823 | -4.319079090 | -2.454247805 | dmol        | 1    | C     | 0.000 |       |
| H12                                 |                                                                                                                                      | -1.521601310 | -4.341264305 | -1.912363063 | dmol        | 1    | H     | 0.000 |       |
| N13                                 |                                                                                                                                      | -0.325996933 | -4.993429130 | -3.623943442 | dmol        | 1    | N     | 0.000 |       |
| H14                                 |                                                                                                                                      | -0.997814976 | -5.530018101 | -4.159985628 | dmol        | 1    | H     | 0.000 |       |
| C15                                 |                                                                                                                                      | -0.172351588 | -5.000831310 | 1.328455354  | dmol        | 1    | C     | 0.000 |       |
| H16                                 |                                                                                                                                      | -0.525328354 | -6.029308970 | 1.103633094  | dmol        | 1    | H     | 0.000 |       |
| H17                                 |                                                                                                                                      | -0.417541199 | -4.806863515 | 2.399562191  | dmol        | 1    | H     | 0.000 |       |
| C18                                 |                                                                                                                                      | 1.373000603  | -4.995342720 | 1.235817013  | dmol        | 1    | C     | 0.000 |       |
| O19                                 |                                                                                                                                      | 2.044648118  | -5.971687067 | 1.647235050  | dmol        | 1    | O     | 0.000 |       |
| O20                                 |                                                                                                                                      | 1.858758988  | -3.900213630 | 0.718471058  | dmol        | 1    | O     | 0.000 |       |
| O21                                 |                                                                                                                                      | -0.781979417 | -4.056851355 | 0.489008022  | dmol        | 1    | O     | 0.000 |       |
| Fe22                                |                                                                                                                                      | 0.286553903  | 5.227405285  | -0.056363693 | dmol        | 1    | Fe    | 0.000 |       |
| Fe23                                |                                                                                                                                      | -1.469457511 | 2.835922404  | 0.932870695  | dmol        | 1    | Fe    | 0.000 |       |
| Fe24                                |                                                                                                                                      | 1.350552077  | 2.764473522  | 0.894960373  | dmol        | 1    | Fe    | 0.000 |       |
| Fe25                                |                                                                                                                                      | 0.147184278  | 2.682892062  | -1.481294222 | dmol        | 1    | Fe    | 0.000 |       |
| Fe26                                |                                                                                                                                      | 0.193643728  | 0.122095467  | -1.418226223 | dmol        | 1    | Fe    | 0.000 |       |
| Fe27                                |                                                                                                                                      | -1.650990331 | 0.056629244  | 1.091707206  | dmol        | 1    | Fe    | 0.000 |       |
| Fe28                                |                                                                                                                                      | 1.438816574  | 0.164494531  | 0.903504886  | dmol        | 1    | Fe    | 0.000 |       |
| Mo29                                |                                                                                                                                      | 0.405337656  | -2.367955284 | 0.009293103  | dmol        | 1    | Mo    | 0.000 |       |
| S30                                 |                                                                                                                                      | -1.486486884 | 4.236891331  | -0.985690677 | dmol        | 1    | S     | 0.000 |       |
| S31                                 |                                                                                                                                      | 0.043742691  | 4.316708821  | 1.970352195  | dmol        | 1    | S     | 0.000 |       |
| S32                                 |                                                                                                                                      | 0.082040694  | 1.363823326  | -3.281015904 | dmol        | 1    | S     | 0.000 |       |
| S33                                 | 1.950516302                                                                                                                          | 4.087117449  | -0.939226935 | dmol         | 1           | S    | 0.000 |       |       |

|                                                                            |      |              |              |              |      |   |    |       |
|----------------------------------------------------------------------------|------|--------------|--------------|--------------|------|---|----|-------|
|                                                                            | S34  | -1.592395104 | -1.257874112 | -0.858642861 | dmol | 1 | S  | 0.000 |
|                                                                            | S35  | -3.384030489 | 1.608940781  | 0.396271373  | dmol | 1 | S  | 0.000 |
|                                                                            | S36  | 0.090800415  | -1.280726495 | 2.139599029  | dmol | 1 | S  | 0.000 |
|                                                                            | S37  | 2.176860711  | -1.014513095 | -0.954764871 | dmol | 1 | S  | 0.000 |
|                                                                            | S38  | 2.809061136  | 1.522845537  | 2.052845784  | dmol | 1 | S  | 0.000 |
|                                                                            | N39  | 0.124062572  | 1.445973361  | 0.057655350  | dmol | 1 | N  | 0.000 |
|                                                                            | N40  | -1.352046500 | 1.499813437  | 2.425884361  | dmol | 1 | N  | 0.000 |
|                                                                            | N41  | -2.448709501 | 0.750067319  | 2.789895920  | dmol | 1 | N  | 0.000 |
|                                                                            | H42  | -0.523157213 | 1.319020623  | 3.001022751  | dmol | 1 | H  | 0.000 |
|                                                                            | H43  | -2.291354671 | 0.103113173  | 3.575241503  | dmol | 1 | H  | 0.000 |
|                                                                            | H44  | -2.516468954 | 3.736301300  | 1.561983745  | dmol | 1 | H  | 0.000 |
|                                                                            | H45  | -3.382737800 | 1.180191192  | 2.053912778  | dmol | 1 | H  | 0.000 |
|                                                                            | H46  | -2.567889213 | -1.110186695 | 1.382735778  | dmol | 1 | H  | 0.000 |
| <b>2HN<sub>2</sub>H<sub>3</sub>-b</b>                                      | 46   |              |              |              |      |   |    |       |
| fe626n2h26x2                                                               | C1   | 1.489223907  | 8.216617033  | 0.602623134  | dmol | 1 | C  | 0.000 |
| x2btf9_3a.cm                                                               | H2   | 2.463936458  | 7.971732115  | 0.156739512  | dmol | 1 | H  | 0.000 |
| mf                                                                         | H3   | 1.361306717  | 9.311917420  | 0.601467752  | dmol | 1 | H  | 0.000 |
|                                                                            | H4   | 1.478010786  | 7.862274284  | 1.642452774  | dmol | 1 | H  | 0.000 |
|                                                                            | S5   | 0.084374393  | 7.446467020  | -0.370075062 | dmol | 1 | S  | 0.000 |
|                                                                            | C6   | 1.460901320  | -3.829565333 | -3.029180582 | dmol | 1 | C  | 0.000 |
|                                                                            | H7   | 2.423632393  | -3.341544470 | -2.941077508 | dmol | 1 | H  | 0.000 |
|                                                                            | N8   | 0.486933284  | -3.631036235 | -2.067046916 | dmol | 1 | N  | 0.000 |
|                                                                            | C9   | 0.986228253  | -4.677231501 | -4.005385170 | dmol | 1 | C  | 0.000 |
|                                                                            | H10  | 1.430814673  | -5.078812825 | -4.908317154 | dmol | 1 | H  | 0.000 |
|                                                                            | C11  | -0.571420803 | -4.335828633 | -2.434787519 | dmol | 1 | C  | 0.000 |
|                                                                            | H12  | -1.490825828 | -4.398976699 | -1.866086718 | dmol | 1 | H  | 0.000 |
|                                                                            | N13  | -0.317458761 | -4.997774020 | -3.613066496 | dmol | 1 | N  | 0.000 |
|                                                                            | H14  | -0.978755470 | -5.563611297 | -4.131702966 | dmol | 1 | H  | 0.000 |
|                                                                            | C15  | -0.173074083 | -4.998058754 | 1.305612827  | dmol | 1 | C  | 0.000 |
|                                                                            | H16  | -0.510489566 | -6.024021296 | 1.042574377  | dmol | 1 | H  | 0.000 |
|                                                                            | H17  | -0.436455970 | -4.844342989 | 2.378823965  | dmol | 1 | H  | 0.000 |
|                                                                            | C18  | 1.372787846  | -4.973405669 | 1.233708154  | dmol | 1 | C  | 0.000 |
|                                                                            | O19  | 2.050468217  | -5.940795074 | 1.655498982  | dmol | 1 | O  | 0.000 |
|                                                                            | O20  | 1.853029576  | -3.874067032 | 0.720509997  | dmol | 1 | O  | 0.000 |
|                                                                            | O21  | -0.782264946 | -4.032505086 | 0.491976910  | dmol | 1 | O  | 0.000 |
|                                                                            | Fe22 | 0.309941034  | 5.223370722  | -0.022626711 | dmol | 1 | Fe | 0.000 |
|                                                                            | Fe23 | -1.495743670 | 2.695831191  | 0.817361669  | dmol | 1 | Fe | 0.000 |
|                                                                            | Fe24 | 1.447135216  | 2.834988652  | 0.874164455  | dmol | 1 | Fe | 0.000 |
|                                                                            | Fe25 | 0.284996342  | 2.736156343  | -1.500161313 | dmol | 1 | Fe | 0.000 |
|                                                                            | Fe26 | 0.165484414  | 0.165727242  | -1.390305996 | dmol | 1 | Fe | 0.000 |
|                                                                            | Fe27 | -1.909880435 | -0.100099489 | 1.132355983  | dmol | 1 | Fe | 0.000 |
|                                                                            | Fe28 | 1.466818139  | 0.208615223  | 0.910678814  | dmol | 1 | Fe | 0.000 |
|                                                                            | Mo29 | 0.401285333  | -2.336375860 | 0.034180153  | dmol | 1 | Mo | 0.000 |
|                                                                            | S30  | -1.413831784 | 4.215575092  | -1.010296036 | dmol | 1 | S  | 0.000 |
|                                                                            | S31  | 0.016120493  | 4.251986950  | 1.981583502  | dmol | 1 | S  | 0.000 |
|                                                                            | S32  | 0.142429716  | 1.404421086  | -3.272140829 | dmol | 1 | S  | 0.000 |
|                                                                            | S33  | 2.030061268  | 4.188858176  | -0.955858963 | dmol | 1 | S  | 0.000 |
|                                                                            | S34  | -1.611400692 | -1.265692504 | -0.842466976 | dmol | 1 | S  | 0.000 |
|                                                                            | S35  | -3.316821735 | 1.466373718  | 0.148889834  | dmol | 1 | S  | 0.000 |
|                                                                            | S36  | 0.089628456  | -1.253494473 | 2.152869001  | dmol | 1 | S  | 0.000 |
|                                                                            | S37  | 2.152497575  | -0.991421572 | -0.956880320 | dmol | 1 | S  | 0.000 |
|                                                                            | S38  | 2.885921866  | 1.550011970  | 2.019693156  | dmol | 1 | S  | 0.000 |
|                                                                            | N39  | 0.237647919  | 1.559523988  | 0.010231200  | dmol | 1 | N  | 0.000 |
|                                                                            | N40  | -1.412672731 | 1.400110473  | 2.299778528  | dmol | 1 | N  | 0.000 |
|                                                                            | N41  | -2.541096208 | 0.729095033  | 2.835449618  | dmol | 1 | N  | 0.000 |
|                                                                            | H42  | -0.582193843 | 1.253133129  | 2.884772403  | dmol | 1 | H  | 0.000 |
|                                                                            | H43  | -2.408385040 | 0.251527508  | 3.733565036  | dmol | 1 | H  | 0.000 |
|                                                                            | H44  | -2.550071726 | 3.623686852  | 1.424025300  | dmol | 1 | H  | 0.000 |
|                                                                            | H45  | -3.405714572 | 1.259116380  | 2.654476269  | dmol | 1 | H  | 0.000 |
|                                                                            | H46  | -2.663057732 | -1.338456791 | 1.571400198  | dmol | 1 | H  | 0.000 |
| <b>TS: 2HN<sub>2</sub>H<sub>3</sub>-b → 1HN<sub>2</sub>H<sub>4</sub>-a</b> | 46   |              |              |              |      |   |    |       |
| fe626n2h36x2                                                               | C1   | 1.332397     | 6.553680     | 0.601334     | dmol | 1 | C  | 0.000 |
| xtvk_origa.cm                                                              | H2   | 2.293000     | 6.285217     | 0.139160     | dmol | 1 | H  | 0.000 |
| mf                                                                         | H3   | 1.231049     | 7.651611     | 0.603729     | dmol | 1 | H  | 0.000 |
|                                                                            | H4   | 1.330414     | 6.196503     | 1.640228     | dmol | 1 | H  | 0.000 |
|                                                                            | S5   | -0.106506    | 5.818893     | -0.352097    | dmol | 1 | S  | 0.000 |
|                                                                            | C6   | 1.151627     | -5.451233    | -3.111633    | dmol | 1 | C  | 0.000 |
|                                                                            | H7   | 2.118851     | -4.970718    | -3.029404    | dmol | 1 | H  | 0.000 |
|                                                                            | N8   | 0.188248     | -5.253128    | -2.139832    | dmol | 1 | N  | 0.000 |
|                                                                            | C9   | 0.662964     | -6.289108    | -4.090271    | dmol | 1 | C  | 0.000 |
|                                                                            | H10  | 1.095154     | -6.687088    | -5.000809    | dmol | 1 | H  | 0.000 |
|                                                                            | C11  | -0.877914    | -5.948196    | -2.502747    | dmol | 1 | C  | 0.000 |
|                                                                            | H12  | -1.792770    | -6.007400    | -1.926010    | dmol | 1 | H  | 0.000 |
|                                                                            | N13  | -0.639481    | -6.603683    | -3.687988    | dmol | 1 | N  | 0.000 |
|                                                                            | H14  | -1.310135    | -7.162292    | -4.202972    | dmol | 1 | H  | 0.000 |
|                                                                            | C15  | -0.477051    | -6.636154    | 1.219223     | dmol | 1 | C  | 0.000 |
|                                                                            | H16  | -0.824448    | -7.656021    | 0.949661     | dmol | 1 | H  | 0.000 |

|                                                                       |      |              |              |              |      |   |    |       |
|-----------------------------------------------------------------------|------|--------------|--------------|--------------|------|---|----|-------|
|                                                                       | H17  | -0.739349    | -6.484146    | 2.292572     | dmol | 1 | H  | 0.000 |
|                                                                       | C18  | 1.068008     | -6.623306    | 1.147003     | dmol | 1 | C  | 0.000 |
|                                                                       | O19  | 1.735443     | -7.600937    | 1.562332     | dmol | 1 | O  | 0.000 |
|                                                                       | O20  | 1.556183     | -5.523438    | 0.641724     | dmol | 1 | O  | 0.000 |
|                                                                       | O21  | -1.081345    | -5.663910    | 0.408569     | dmol | 1 | O  | 0.000 |
|                                                                       | Fe22 | 0.111191     | 3.591995     | -0.041855    | dmol | 1 | Fe | 0.000 |
|                                                                       | Fe23 | -1.637650    | 0.935562     | 0.638306     | dmol | 1 | Fe | 0.000 |
|                                                                       | Fe24 | 1.284561     | 1.190887     | 0.822510     | dmol | 1 | Fe | 0.000 |
|                                                                       | Fe25 | 0.122620     | 1.114578     | -1.550247    | dmol | 1 | Fe | 0.000 |
|                                                                       | Fe26 | -0.125641    | -1.448441    | -1.411270    | dmol | 1 | Fe | 0.000 |
|                                                                       | Fe27 | -2.239700    | -1.840927    | 1.100555     | dmol | 1 | Fe | 0.000 |
|                                                                       | Fe28 | 1.172043     | -1.439865    | 0.905045     | dmol | 1 | Fe | 0.000 |
|                                                                       | Mo29 | 0.095932     | -3.960342    | -0.012619    | dmol | 1 | Mo | 0.000 |
|                                                                       | S30  | -1.616882    | 2.563232     | -1.045364    | dmol | 1 | S  | 0.000 |
|                                                                       | S31  | -0.116714    | 2.618408     | 1.924545     | dmol | 1 | S  | 0.000 |
|                                                                       | S32  | -0.068771    | -0.227020    | -3.310715    | dmol | 1 | S  | 0.000 |
|                                                                       | S33  | 1.840759     | 2.574844     | -0.989258    | dmol | 1 | S  | 0.000 |
|                                                                       | S34  | -1.889206    | -2.895233    | -0.945587    | dmol | 1 | S  | 0.000 |
|                                                                       | S35  | -3.552887    | -0.117462    | 0.142136     | dmol | 1 | S  | 0.000 |
|                                                                       | S36  | -0.219437    | -2.919785    | 2.106918     | dmol | 1 | S  | 0.000 |
|                                                                       | S37  | 1.858704     | -2.601181    | -0.978134    | dmol | 1 | S  | 0.000 |
|                                                                       | S38  | 2.658707     | -0.144119    | 1.988403     | dmol | 1 | S  | 0.000 |
|                                                                       | N39  | 0.000000     | 0.000000     | 0.000000     | dmol | 1 | N  | 0.000 |
|                                                                       | N40  | -1.663406    | -0.159912    | 2.400085     | dmol | 1 | N  | 0.000 |
|                                                                       | N41  | -2.780823    | -0.971786    | 2.810303     | dmol | 1 | N  | 0.000 |
|                                                                       | H42  | -0.835052    | -0.339066    | 2.973938     | dmol | 1 | H  | 0.000 |
|                                                                       | H43  | -2.653473    | -1.362625    | 3.743011     | dmol | 1 | H  | 0.000 |
|                                                                       | H44  | -2.111649    | 1.241776     | 2.099503     | dmol | 1 | H  | 0.000 |
|                                                                       | H45  | -3.644897    | -0.425552    | 2.699631     | dmol | 1 | H  | 0.000 |
|                                                                       | H46  | -3.096695    | -3.069229    | 1.440521     | dmol | 1 | H  | 0.000 |
| <b>1HN<sub>2</sub>H<sub>4</sub>-a</b><br>fe626n2h36x2<br>xtvk_4a.cmmf | 46   |              |              |              |      |   |    |       |
|                                                                       | C1   | 1.535254386  | 8.195982812  | 0.574863846  | dmol | 1 | C  | 0.000 |
|                                                                       | H2   | 2.497591080  | 7.898193653  | 0.135930392  | dmol | 1 | H  | 0.000 |
|                                                                       | H3   | 1.471294975  | 9.296885614  | 0.587404831  | dmol | 1 | H  | 0.000 |
|                                                                       | H4   | 1.492321196  | 7.826130367  | 1.608248562  | dmol | 1 | H  | 0.000 |
|                                                                       | S5   | 0.107423511  | 7.507825022  | -0.430061411 | dmol | 1 | S  | 0.000 |
|                                                                       | C6   | 1.359873078  | -3.756303966 | -3.051933523 | dmol | 1 | C  | 0.000 |
|                                                                       | H7   | 2.308221159  | -3.238961978 | -2.967577076 | dmol | 1 | H  | 0.000 |
|                                                                       | N8   | 0.394304427  | -3.613055372 | -2.072863204 | dmol | 1 | N  | 0.000 |
|                                                                       | C9   | 0.897335686  | -4.592185074 | -4.045549365 | dmol | 1 | C  | 0.000 |
|                                                                       | H10  | 1.336239049  | -4.951920059 | -4.969194349 | dmol | 1 | H  | 0.000 |
|                                                                       | C11  | -0.645750805 | -4.339242121 | -2.445062205 | dmol | 1 | C  | 0.000 |
|                                                                       | H12  | -1.558193240 | -4.435359406 | -1.868865815 | dmol | 1 | H  | 0.000 |
|                                                                       | N13  | -0.389743174 | -4.964856143 | -3.643098964 | dmol | 1 | N  | 0.000 |
|                                                                       | H14  | -1.045526432 | -5.528296080 | -4.171789219 | dmol | 1 | H  | 0.000 |
|                                                                       | C15  | -0.286967938 | -4.968514200 | 1.248988001  | dmol | 1 | C  | 0.000 |
|                                                                       | H16  | -0.602760410 | -5.989896810 | 0.944015906  | dmol | 1 | H  | 0.000 |
|                                                                       | H17  | -0.531378044 | -4.873167254 | 2.333639906  | dmol | 1 | H  | 0.000 |
|                                                                       | C18  | 1.256746899  | -4.899493789 | 1.148188032  | dmol | 1 | C  | 0.000 |
|                                                                       | O19  | 1.966403144  | -5.862008269 | 1.527268359  | dmol | 1 | O  | 0.000 |
|                                                                       | O20  | 1.699592996  | -3.772694959 | 0.663784680  | dmol | 1 | O  | 0.000 |
|                                                                       | O21  | -0.944718516 | -3.986233499 | 0.489450166  | dmol | 1 | O  | 0.000 |
|                                                                       | Fe22 | 0.318390844  | 5.279474259  | -0.103205778 | dmol | 1 | Fe | 0.000 |
|                                                                       | Fe23 | -1.299943524 | 2.708786650  | 0.703488591  | dmol | 1 | Fe | 0.000 |
|                                                                       | Fe24 | 1.479126657  | 2.885024707  | 0.864257413  | dmol | 1 | Fe | 0.000 |
|                                                                       | Fe25 | 0.427094557  | 2.757332747  | -1.560731088 | dmol | 1 | Fe | 0.000 |
|                                                                       | Fe26 | 0.129719350  | 0.206483024  | -1.406825544 | dmol | 1 | Fe | 0.000 |
|                                                                       | Fe27 | -1.846183006 | -0.382653231 | 0.951860620  | dmol | 1 | Fe | 0.000 |
|                                                                       | Fe28 | 1.311424306  | 0.260954757  | 0.959885453  | dmol | 1 | Fe | 0.000 |
|                                                                       | Mo29 | 0.177649952  | -2.252363939 | 0.069340538  | dmol | 1 | Mo | 0.000 |
|                                                                       | S30  | -1.342428945 | 4.179031503  | -1.128449302 | dmol | 1 | S  | 0.000 |
|                                                                       | S31  | 0.044236197  | 4.361694859  | 1.915164546  | dmol | 1 | S  | 0.000 |
|                                                                       | S32  | 0.313544871  | 1.384161894  | -3.308870251 | dmol | 1 | S  | 0.000 |
|                                                                       | S33  | 2.106258264  | 4.234350401  | -0.930327420 | dmol | 1 | S  | 0.000 |
|                                                                       | S34  | -1.669645067 | -1.265539061 | -1.103674562 | dmol | 1 | S  | 0.000 |
|                                                                       | S35  | -3.134427661 | 1.434534424  | 0.098478459  | dmol | 1 | S  | 0.000 |
|                                                                       | S36  | -0.074559046 | -1.242208470 | 2.173991862  | dmol | 1 | S  | 0.000 |
|                                                                       | S37  | 2.037993182  | -0.986425099 | -0.841952794 | dmol | 1 | S  | 0.000 |
|                                                                       | S38  | 2.762169395  | 1.531011836  | 2.125610401  | dmol | 1 | S  | 0.000 |
|                                                                       | N39  | 0.188917545  | 1.651682798  | 0.037080248  | dmol | 1 | N  | 0.000 |
|                                                                       | N40  | -1.397019057 | 1.816727782  | 2.662389456  | dmol | 1 | N  | 0.000 |
|                                                                       | N41  | -2.305925488 | 0.672051130  | 2.677815052  | dmol | 1 | N  | 0.000 |
|                                                                       | H42  | -0.449994215 | 1.468140613  | 2.858974239  | dmol | 1 | H  | 0.000 |
|                                                                       | H43  | -2.333875983 | 0.202140538  | 3.591841704  | dmol | 1 | H  | 0.000 |
|                                                                       | H44  | -1.638921327 | 2.512580643  | 3.377910337  | dmol | 1 | H  | 0.000 |
|                                                                       | H45  | -3.218987123 | 1.036321149  | 2.344866850  | dmol | 1 | H  | 0.000 |
|                                                                       | H46  | -2.902177871 | -1.406124403 | 1.375293419  | dmol | 1 | H  | 0.000 |

|                                                                                                                                   |              |              |              |              |      |          |          |
|-----------------------------------------------------------------------------------------------------------------------------------|--------------|--------------|--------------|--------------|------|----------|----------|
| <b>TS: 3HN<sub>2</sub>H<sub>2</sub>-a</b><br><b>→ 2HN<sub>2</sub>H<sub>3</sub>-a</b><br>fe6n2h2n2x2b<br>6htun_1_4335.<br>62a.cmmf | 46           |              |              |              |      |          |          |
|                                                                                                                                   | C1           | 1.514448761  | 8.225688466  | 0.699325283  | dmol | 1        | C 0.000  |
|                                                                                                                                   | H2           | 2.463845995  | 7.974100332  | 0.209378796  | dmol | 1        | H 0.000  |
|                                                                                                                                   | H3           | 1.385372303  | 9.319446423  | 0.694503216  | dmol | 1        | H 0.000  |
|                                                                                                                                   | H4           | 1.548105830  | 7.877119782  | 1.739016776  | dmol | 1        | H 0.000  |
|                                                                                                                                   | S5           | 0.066867283  | 7.440537634  | -0.199395776 | dmol | 1        | S 0.000  |
|                                                                                                                                   | C6           | 1.483887742  | -3.852045193 | -3.031551872 | dmol | 1        | C 0.000  |
|                                                                                                                                   | H7           | 2.467068378  | -3.413508573 | -2.911884542 | dmol | 1        | H 0.000  |
|                                                                                                                                   | N8           | 0.492930965  | -3.611852154 | -2.096913677 | dmol | 1        | N 0.000  |
|                                                                                                                                   | C9           | 0.996588792  | -4.671098483 | -4.026425815 | dmol | 1        | C 0.000  |
|                                                                                                                                   | H10          | 1.444862497  | -5.089097566 | -4.920160287 | dmol | 1        | H 0.000  |
|                                                                                                                                   | C11          | -0.586395412 | -4.264867058 | -2.496661951 | dmol | 1        | C 0.000  |
|                                                                                                                                   | H12          | -1.522757411 | -4.287590177 | -1.953347945 | dmol | 1        | H 0.000  |
|                                                                                                                                   | N13          | -0.332169965 | -4.930337432 | -3.672552388 | dmol | 1        | N 0.000  |
|                                                                                                                                   | H14          | -1.006811250 | -5.458408490 | -4.213587447 | dmol | 1        | H 0.000  |
|                                                                                                                                   | C15          | -0.182231788 | -4.984709129 | 1.274411877  | dmol | 1        | C 0.000  |
|                                                                                                                                   | H16          | -0.534423257 | -6.012639818 | 1.0426758671 | dmol | 1        | H 0.000  |
|                                                                                                                                   | H17          | -0.422043605 | -4.801963090 | 2.349491379  | dmol | 1        | H 0.000  |
|                                                                                                                                   | C18          | 1.361953762  | -4.976771805 | 1.176166458  | dmol | 1        | C 0.000  |
|                                                                                                                                   | O19          | 2.037531813  | -5.957733684 | 1.568268052  | dmol | 1        | O 0.000  |
|                                                                                                                                   | O20          | 1.851136714  | -3.872190000 | 0.675305271  | dmol | 1        | O 0.000  |
|                                                                                                                                   | O21          | -0.798778661 | -4.036710044 | 0.446967162  | dmol | 1        | O 0.000  |
|                                                                                                                                   | Fe22         | 0.400021962  | 5.228600894  | 0.011479305  | dmol | 1        | Fe 0.000 |
|                                                                                                                                   | Fe23         | -1.358835487 | 2.739812674  | 0.851995086  | dmol | 1        | Fe 0.000 |
|                                                                                                                                   | Fe24         | 1.393726642  | 2.800938733  | 0.932960457  | dmol | 1        | Fe 0.000 |
|                                                                                                                                   | Fe25         | 0.239145225  | 2.766580503  | -1.441940183 | dmol | 1        | Fe 0.000 |
|                                                                                                                                   | Fe26         | 0.127093130  | 0.141958037  | -1.375505204 | dmol | 1        | Fe 0.000 |
|                                                                                                                                   | Fe27         | -1.734769629 | 0.001001731  | 1.122020455  | dmol | 1        | Fe 0.000 |
|                                                                                                                                   | Fe28         | 1.411410192  | 0.167032641  | 0.959410531  | dmol | 1        | Fe 0.000 |
|                                                                                                                                   | Mo29         | 0.399272538  | -2.335417074 | 0.007272488  | dmol | 1        | Mo 0.000 |
|                                                                                                                                   | S30          | -1.440449333 | 4.297661506  | -0.886156709 | dmol | 1        | S 0.000  |
|                                                                                                                                   | S31          | 0.040670404  | 4.308566768  | 2.023783088  | dmol | 1        | S 0.000  |
|                                                                                                                                   | S32          | 0.109210589  | 1.443055887  | -3.233107135 | dmol | 1        | S 0.000  |
|                                                                                                                                   | S33          | 2.085327726  | 4.116004248  | -0.886404310 | dmol | 1        | S 0.000  |
|                                                                                                                                   | S34          | -1.638749132 | -1.255361440 | -0.841263592 | dmol | 1        | S 0.000  |
|                                                                                                                                   | S35          | -3.283262612 | 1.593514901  | 0.107403748  | dmol | 1        | S 0.000  |
|                                                                                                                                   | S36          | 0.037182832  | -1.284882127 | 2.161708911  | dmol | 1        | S 0.000  |
|                                                                                                                                   | S37          | 2.156876226  | -0.956703743 | -0.951111917 | dmol | 1        | S 0.000  |
|                                                                                                                                   | S38          | 2.839882041  | 1.531340907  | 2.060663834  | dmol | 1        | S 0.000  |
|                                                                                                                                   | N39          | 0.148297689  | 1.543319174  | 0.095133951  | dmol | 1        | N 0.000  |
|                                                                                                                                   | N40          | -1.510156510 | 1.421957815  | 2.521019525  | dmol | 1        | N 0.000  |
|                                                                                                                                   | N41          | -2.545819231 | 0.558900714  | 2.864288404  | dmol | 1        | N 0.000  |
|                                                                                                                                   | H42          | -0.681214235 | 1.416265861  | 3.128592578  | dmol | 1        | H 0.000  |
|                                                                                                                                   | H43          | -2.130781165 | -0.096778653 | 3.549927715  | dmol | 1        | H 0.000  |
|                                                                                                                                   | H44          | -2.063842137 | 2.719114610  | 2.271876413  | dmol | 1        | H 0.000  |
|                                                                                                                                   | H45          | -4.045019594 | 1.659937092  | 1.234313203  | dmol | 1        | H 0.000  |
| H46                                                                                                                               | -2.684207618 | -1.141791598 | 1.358528118  | dmol         | 1    | H 0.000  |          |
| <b>2HN<sub>2</sub>H<sub>3</sub>-a</b><br>fe6n2h2n2x2b<br>6htum_6a.cm<br>mf                                                        | 46           |              |              |              |      |          |          |
|                                                                                                                                   | C1           | 1.501962445  | 8.213690352  | 0.679417107  | dmol | 1        | C 0.000  |
|                                                                                                                                   | H2           | 2.447757944  | 7.937034308  | 0.194337568  | dmol | 1        | H 0.000  |
|                                                                                                                                   | H3           | 1.399842332  | 9.311492730  | 0.674522909  | dmol | 1        | H 0.000  |
|                                                                                                                                   | H4           | 1.523816154  | 7.864287820  | 1.720349385  | dmol | 1        | H 0.000  |
|                                                                                                                                   | S5           | 0.045256752  | 7.457600189  | -0.223549390 | dmol | 1        | S 0.000  |
|                                                                                                                                   | C6           | 1.456097910  | -3.811104459 | -3.020268383 | dmol | 1        | C 0.000  |
|                                                                                                                                   | H7           | 2.420726063  | -3.331402230 | -2.905184639 | dmol | 1        | H 0.000  |
|                                                                                                                                   | N8           | 0.467029661  | -3.627390443 | -2.072247767 | dmol | 1        | N 0.000  |
|                                                                                                                                   | C9           | 0.993359428  | -4.634202555 | -4.024716358 | dmol | 1        | C 0.000  |
|                                                                                                                                   | H10          | 1.446068577  | -5.014951118 | -4.932944934 | dmol | 1        | H 0.000  |
|                                                                                                                                   | C11          | -0.586518292 | -4.318405122 | -2.472083849 | dmol | 1        | C 0.000  |
|                                                                                                                                   | H12          | -1.517994650 | -4.383009807 | -1.923028472 | dmol | 1        | H 0.000  |
|                                                                                                                                   | N13          | -0.317951822 | -4.957956138 | -3.659720907 | dmol | 1        | N 0.000  |
|                                                                                                                                   | H14          | -0.978576570 | -5.497367223 | -4.207223389 | dmol | 1        | H 0.000  |
|                                                                                                                                   | C15          | -0.236604452 | -4.949043813 | 1.257521003  | dmol | 1        | C 0.000  |
|                                                                                                                                   | H16          | -0.552012312 | -5.977930017 | 0.979962712  | dmol | 1        | H 0.000  |
|                                                                                                                                   | H17          | -0.473955447 | -4.829318575 | 2.341322041  | dmol | 1        | H 0.000  |
|                                                                                                                                   | C18          | 1.305449499  | -4.882726552 | 1.146013475  | dmol | 1        | C 0.000  |
|                                                                                                                                   | O19          | 2.021689108  | -5.841730417 | 1.518864179  | dmol | 1        | O 0.000  |
| O20                                                                                                                               | 1.748407760  | -3.755553602 | 0.656550669  | dmol         | 1    | O 0.000  |          |
| O21                                                                                                                               | -0.897174204 | -3.984944056 | 0.479358607  | dmol         | 1    | O 0.000  |          |
| Fe22                                                                                                                              | 0.334028546  | 5.220361560  | -0.110590000 | dmol         | 1    | Fe 0.000 |          |
| Fe23                                                                                                                              | -1.305514360 | 2.609144611  | 0.784965664  | dmol         | 1    | Fe 0.000 |          |
| Fe24                                                                                                                              | 1.493893018  | 2.839604924  | 0.981681407  | dmol         | 1    | Fe 0.000 |          |
| Fe25                                                                                                                              | 0.266824284  | 2.812742676  | -1.498069149 | dmol         | 1    | Fe 0.000 |          |
| Fe26                                                                                                                              | 0.185384647  | 0.214814790  | -1.364147797 | dmol         | 1    | Fe 0.000 |          |
| Fe27                                                                                                                              | -1.765645489 | -0.326654246 | 0.952660785  | dmol         | 1    | Fe 0.000 |          |
| Fe28                                                                                                                              | 1.298847756  | 0.211130687  | 0.999252079  | dmol         | 1    | Fe 0.000 |          |
| Mo29                                                                                                                              | 0.236234422  | -2.243896480 | 0.049525434  | dmol         | 1    | Mo 0.000 |          |
| S30                                                                                                                               | -1.475759770 | 4.206028916  | -1.021132924 | dmol         | 1    | S 0.000  |          |

|                                                                                                                            |              |              |              |              |      |   |       |       |
|----------------------------------------------------------------------------------------------------------------------------|--------------|--------------|--------------|--------------|------|---|-------|-------|
|                                                                                                                            | S31          | -0.012352927 | 4.331587414  | 1.908493741  | dmol | 1 | S     | 0.000 |
|                                                                                                                            | S32          | 0.232271110  | 1.425783607  | -3.252802013 | dmol | 1 | S     | 0.000 |
|                                                                                                                            | S33          | 2.149641260  | 4.141481799  | -0.882308136 | dmol | 1 | S     | 0.000 |
|                                                                                                                            | S34          | -1.589615254 | -1.246512637 | -1.142165494 | dmol | 1 | S     | 0.000 |
|                                                                                                                            | S35          | -3.205830812 | 1.382883432  | 0.050768360  | dmol | 1 | S     | 0.000 |
|                                                                                                                            | S36          | -0.068683610 | -1.257138393 | 2.183451418  | dmol | 1 | S     | 0.000 |
|                                                                                                                            | S37          | 2.099959344  | -0.954525552 | -0.823377239 | dmol | 1 | S     | 0.000 |
|                                                                                                                            | S38          | 2.758103714  | 1.451824922  | 2.196222040  | dmol | 1 | S     | 0.000 |
|                                                                                                                            | N39          | 0.170323774  | 1.593414711  | 0.105640206  | dmol | 1 | N     | 0.000 |
|                                                                                                                            | N40          | -1.513235093 | 1.799483058  | 2.682062479  | dmol | 1 | N     | 0.000 |
|                                                                                                                            | N41          | -2.363200635 | 0.577846691  | 2.687020675  | dmol | 1 | N     | 0.000 |
|                                                                                                                            | H42          | -0.551129748 | 1.600311144  | 2.990469831  | dmol | 1 | H     | 0.000 |
|                                                                                                                            | H43          | -2.001629513 | 0.010889255  | 3.468015487  | dmol | 1 | H     | 0.000 |
|                                                                                                                            | H44          | -1.892973510 | 2.505507095  | 3.327111928  | dmol | 1 | H     | 0.000 |
|                                                                                                                            | H45          | -3.849029864 | 1.447065722  | 1.248552975  | dmol | 1 | H     | 0.000 |
|                                                                                                                            | H46          | -2.847587174 | -1.340248976 | 1.271446675  | dmol | 1 | H     | 0.000 |
| <b>TS: 2HN<sub>2</sub>H<sub>3</sub>-<br/>a →<br/>1HN<sub>2</sub>H<sub>4</sub>-a</b><br>fe6n2h3266xs<br>btuk_origa.cm<br>mf | 46           |              |              |              |      |   |       |       |
|                                                                                                                            | C1           | 1.289856     | 6.654724     | 0.483200     | dmol | 1 | C     | 0.000 |
|                                                                                                                            | H2           | 2.228058     | 6.392532     | -0.025146    | dmol | 1 | H     | 0.000 |
|                                                                                                                            | H3           | 1.171555     | 7.751297     | 0.475677     | dmol | 1 | H     | 0.000 |
|                                                                                                                            | H4           | 1.346710     | 6.313507     | 1.525681     | dmol | 1 | H     | 0.000 |
|                                                                                                                            | S5           | -0.182434    | 5.874969     | -0.376450    | dmol | 1 | S     | 0.000 |
|                                                                                                                            | C6           | 1.257507     | -5.449478    | -3.111313    | dmol | 1 | C     | 0.000 |
|                                                                                                                            | H7           | 2.234177     | -4.990692    | -3.013779    | dmol | 1 | H     | 0.000 |
|                                                                                                                            | N8           | 0.279800     | -5.225174    | -2.159744    | dmol | 1 | N     | 0.000 |
|                                                                                                                            | C9           | 0.767487     | -6.278992    | -4.097488    | dmol | 1 | C     | 0.000 |
|                                                                                                                            | H10          | 1.205154     | -6.689575    | -5.000092    | dmol | 1 | H     | 0.000 |
|                                                                                                                            | C11          | -0.793259    | -5.896408    | -2.540512    | dmol | 1 | C     | 0.000 |
|                                                                                                                            | H12          | -1.723785    | -5.924042    | -1.987442    | dmol | 1 | H     | 0.000 |
|                                                                                                                            | N13          | -0.549408    | -6.562027    | -3.718704    | dmol | 1 | N     | 0.000 |
|                                                                                                                            | H14          | -1.226654    | -7.098679    | -4.248093    | dmol | 1 | H     | 0.000 |
|                                                                                                                            | C15          | -0.348114    | -6.528809    | 1.218307     | dmol | 1 | C     | 0.000 |
|                                                                                                                            | H16          | -0.679688    | -7.562439    | 0.980972     | dmol | 1 | H     | 0.000 |
|                                                                                                                            | H17          | -0.552887    | -6.373810    | 2.304565     | dmol | 1 | H     | 0.000 |
|                                                                                                                            | C18          | 1.190125     | -6.477112    | 1.061768     | dmol | 1 | C     | 0.000 |
|                                                                                                                            | O19          | 1.909302     | -7.434067    | 1.435104     | dmol | 1 | O     | 0.000 |
|                                                                                                                            | O20          | 1.627533     | -5.364395    | 0.536331     | dmol | 1 | O     | 0.000 |
|                                                                                                                            | O21          | -1.021103    | -5.583084    | 0.429733     | dmol | 1 | O     | 0.000 |
|                                                                                                                            | Fe22         | 0.148895     | 3.638855     | -0.183746    | dmol | 1 | Fe    | 0.000 |
|                                                                                                                            | Fe23         | -1.468262    | 1.041214     | 0.693054     | dmol | 1 | Fe    | 0.000 |
|                                                                                                                            | Fe24         | 1.339005     | 1.268509     | 0.794891     | dmol | 1 | Fe    | 0.000 |
|                                                                                                                            | Fe25         | 0.017761     | 1.209274     | -1.628906    | dmol | 1 | Fe    | 0.000 |
|                                                                                                                            | Fe26         | -0.041595    | -1.401840    | -1.461853    | dmol | 1 | Fe    | 0.000 |
|                                                                                                                            | Fe27         | -1.876511    | -1.967102    | 0.893967     | dmol | 1 | Fe    | 0.000 |
|                                                                                                                            | Fe28         | 1.188828     | -1.372040    | 0.844360     | dmol | 1 | Fe    | 0.000 |
|                                                                                                                            | Mo29         | 0.098907     | -3.851196    | -0.042084    | dmol | 1 | Mo    | 0.000 |
|                                                                                                                            | S30          | -1.694229    | 2.636627     | -1.040726    | dmol | 1 | S     | 0.000 |
|                                                                                                                            | S31          | -0.088882    | 2.743546     | 1.846481     | dmol | 1 | S     | 0.000 |
|                                                                                                                            | S32          | -0.070633    | -0.193771    | -3.358063    | dmol | 1 | S     | 0.000 |
|                                                                                                                            | S33          | 1.899155     | 2.577225     | -1.088821    | dmol | 1 | S     | 0.000 |
|                                                                                                                            | S34          | -1.796295    | -2.888367    | -1.164276    | dmol | 1 | S     | 0.000 |
|                                                                                                                            | S35          | -3.391495    | -0.150375    | 0.171783     | dmol | 1 | S     | 0.000 |
| S36                                                                                                                        | -0.120407    | -2.853607    | 2.099976     | dmol         | 1    | S | 0.000 |       |
| S37                                                                                                                        | 1.920502     | -2.555862    | -1.006241    | dmol         | 1    | S | 0.000 |       |
| S38                                                                                                                        | 2.695511     | -0.086609    | 1.936737     | dmol         | 1    | S | 0.000 |       |
| N39                                                                                                                        | 0.000000     | 0.000000     | 0.000000     | dmol         | 1    | N | 0.000 |       |
| N40                                                                                                                        | -1.605026    | 0.210388     | 2.650100     | dmol         | 1    | N | 0.000 |       |
| N41                                                                                                                        | -2.464981    | -0.970169    | 2.579071     | dmol         | 1    | N | 0.000 |       |
| H42                                                                                                                        | -0.648727    | -0.041412    | 2.933456     | dmol         | 1    | H | 0.000 |       |
| H43                                                                                                                        | -2.423096    | -1.494202    | 3.467331     | dmol         | 1    | H | 0.000 |       |
| H44                                                                                                                        | -1.968750    | 0.907898     | 3.312836     | dmol         | 1    | H | 0.000 |       |
| H45                                                                                                                        | -3.432678    | -0.548782    | 1.681702     | dmol         | 1    | H | 0.000 |       |
| H46                                                                                                                        | -2.930817    | -2.993576    | 1.283829     | dmol         | 1    | H | 0.000 |       |
| <b>1HN<sub>2</sub>H<sub>4</sub>-a</b><br>fe6n2h3266xs<br>btuk_3a.cmmf                                                      | 46           |              |              |              |      |   |       |       |
|                                                                                                                            | C1           | 1.439314263  | 8.201005505  | 0.451183070  | dmol | 1 | C     | 0.000 |
|                                                                                                                            | H2           | 2.377394988  | 7.898421959  | -0.035674181 | dmol | 1 | H     | 0.000 |
|                                                                                                                            | H3           | 1.353413048  | 9.300292789  | 0.422406818  | dmol | 1 | H     | 0.000 |
|                                                                                                                            | H4           | 1.470002074  | 7.877125866  | 1.500939452  | dmol | 1 | H     | 0.000 |
|                                                                                                                            | S5           | -0.041445626 | 7.451873202  | -0.419094081 | dmol | 1 | S     | 0.000 |
|                                                                                                                            | C6           | 1.389829182  | -3.720467762 | -3.055959364 | dmol | 1 | C     | 0.000 |
|                                                                                                                            | H7           | 2.328954930  | -3.185104411 | -2.984153864 | dmol | 1 | H     | 0.000 |
|                                                                                                                            | N8           | 0.423590346  | -3.564835225 | -2.080434631 | dmol | 1 | N     | 0.000 |
|                                                                                                                            | C9           | 0.939523360  | -4.594850218 | -4.021222213 | dmol | 1 | C     | 0.000 |
|                                                                                                                            | H10          | 1.383569120  | -4.976032428 | -4.933083813 | dmol | 1 | H     | 0.000 |
|                                                                                                                            | C11          | -0.605199210 | -4.320611489 | -2.425544913 | dmol | 1 | C     | 0.000 |
|                                                                                                                            | H12          | -1.508505523 | -4.420222697 | -1.835796643 | dmol | 1 | H     | 0.000 |
| N13                                                                                                                        | -0.340271816 | -4.976384502 | -3.603966919 | dmol         | 1    | N | 0.000 |       |



|                                                                      |      |              |              |              |      |   |    |       |
|----------------------------------------------------------------------|------|--------------|--------------|--------------|------|---|----|-------|
|                                                                      | H14  | -0.984748397 | -5.574621140 | -4.107175174 | dmol | 1 | H  | 0.000 |
|                                                                      | C15  | -0.258753811 | -4.916316361 | 1.246896513  | dmol | 1 | C  | 0.000 |
|                                                                      | H16  | -0.589158665 | -5.947268924 | 0.993397714  | dmol | 1 | H  | 0.000 |
|                                                                      | H17  | -0.483408509 | -4.770705143 | 2.331098511  | dmol | 1 | H  | 0.000 |
|                                                                      | C18  | 1.283236131  | -4.872168494 | 1.117539524  | dmol | 1 | C  | 0.000 |
|                                                                      | O19  | 1.990192365  | -5.833901077 | 1.502462071  | dmol | 1 | O  | 0.000 |
|                                                                      | O20  | 1.737597472  | -3.763591535 | 0.600352392  | dmol | 1 | O  | 0.000 |
|                                                                      | O21  | -0.912294451 | -3.960945334 | 0.454253557  | dmol | 1 | O  | 0.000 |
|                                                                      | Fe22 | 0.240767995  | 5.222860182  | -0.115072774 | dmol | 1 | Fe | 0.000 |
|                                                                      | Fe23 | -1.345142725 | 2.633209622  | 0.683574343  | dmol | 1 | Fe | 0.000 |
|                                                                      | Fe24 | 1.414677288  | 2.911180086  | 0.968008012  | dmol | 1 | Fe | 0.000 |
|                                                                      | Fe25 | 0.269553824  | 2.851947572  | -1.547108660 | dmol | 1 | Fe | 0.000 |
|                                                                      | Fe26 | 0.207294692  | 0.241838979  | -1.324515586 | dmol | 1 | Fe | 0.000 |
|                                                                      | Fe27 | -1.844218704 | -0.391577381 | 0.956885902  | dmol | 1 | Fe | 0.000 |
|                                                                      | Fe28 | 1.313607387  | 0.234592185  | 0.973941902  | dmol | 1 | Fe | 0.000 |
|                                                                      | Mo29 | 0.233320176  | -2.230544497 | 0.014480749  | dmol | 1 | Mo | 0.000 |
|                                                                      | S30  | -1.549854746 | 4.202444921  | -1.062907343 | dmol | 1 | S  | 0.000 |
|                                                                      | S31  | -0.128915808 | 4.364881138  | 1.913847567  | dmol | 1 | S  | 0.000 |
|                                                                      | S32  | 0.346458876  | 1.465999589  | -3.285370249 | dmol | 1 | S  | 0.000 |
|                                                                      | S33  | 2.099755259  | 4.219303194  | -0.875260183 | dmol | 1 | S  | 0.000 |
|                                                                      | S34  | -1.616342717 | -1.209622406 | -1.140878898 | dmol | 1 | S  | 0.000 |
|                                                                      | S35  | -3.184274587 | 1.425509157  | 0.182109403  | dmol | 1 | S  | 0.000 |
|                                                                      | S36  | -0.052303722 | -1.280799656 | 2.158931600  | dmol | 1 | S  | 0.000 |
|                                                                      | S37  | 2.114802253  | -0.950835924 | -0.849709988 | dmol | 1 | S  | 0.000 |
|                                                                      | S38  | 2.669039743  | 1.548735835  | 2.231084840  | dmol | 1 | S  | 0.000 |
|                                                                      | N39  | 0.171996715  | 1.623061574  | 0.067044120  | dmol | 1 | N  | 0.000 |
|                                                                      | N40  | -1.329879470 | 1.735806958  | 2.655298742  | dmol | 1 | N  | 0.000 |
|                                                                      | N41  | -2.245196109 | 0.596674494  | 2.721440780  | dmol | 1 | N  | 0.000 |
|                                                                      | H42  | -0.377555146 | 1.364866869  | 2.785265333  | dmol | 1 | H  | 0.000 |
|                                                                      | H43  | -2.175057445 | 0.090484384  | 3.614937649  | dmol | 1 | H  | 0.000 |
|                                                                      | H44  | -1.505422126 | 2.429301441  | 3.391961664  | dmol | 1 | H  | 0.000 |
|                                                                      | H45  | -3.184171169 | 0.969988752  | 2.513397871  | dmol | 1 | H  | 0.000 |
|                                                                      | H46  | -2.935771016 | -1.399999650 | 1.320189879  | dmol | 1 | H  | 0.000 |
| Fig 7                                                                |      |              |              |              |      |   |    |       |
| <b>1HN<sub>2</sub>H<sub>4</sub>-a</b><br>fe26n2h46htee<br>qs_3a.cmmf | 46   |              |              |              |      |   |    |       |
|                                                                      | C1   | 1.231190128  | 8.290025011  | 0.649002537  | dmol | 1 | C  | 0.000 |
|                                                                      | H2   | 2.188391990  | 8.068491508  | 0.156761419  | dmol | 1 | H  | 0.000 |
|                                                                      | H3   | 1.085864268  | 9.383275980  | 0.673725690  | dmol | 1 | H  | 0.000 |
|                                                                      | H4   | 1.272020811  | 7.914757812  | 1.680680753  | dmol | 1 | H  | 0.000 |
|                                                                      | S5   | -0.191713024 | 7.501433291  | -0.284308088 | dmol | 1 | S  | 0.000 |
|                                                                      | C6   | 1.385471231  | -3.561199858 | -3.204321933 | dmol | 1 | C  | 0.000 |
|                                                                      | H7   | 2.290905286  | -2.969084904 | -3.141791241 | dmol | 1 | H  | 0.000 |
|                                                                      | N8   | 0.443541901  | -3.507462740 | -2.194281180 | dmol | 1 | N  | 0.000 |
|                                                                      | C9   | 0.960810335  | -4.422163700 | -4.193210438 | dmol | 1 | C  | 0.000 |
|                                                                      | H10  | 1.399063331  | -4.737456382 | -5.133094472 | dmol | 1 | H  | 0.000 |
|                                                                      | C11  | -0.546622387 | -4.311127096 | -2.542883275 | dmol | 1 | C  | 0.000 |
|                                                                      | H12  | -1.423875097 | -4.490685929 | -1.932394500 | dmol | 1 | H  | 0.000 |
|                                                                      | N13  | -0.279077874 | -4.901047252 | -3.756314764 | dmol | 1 | N  | 0.000 |
|                                                                      | H14  | -0.898734237 | -5.519013254 | -4.267328230 | dmol | 1 | H  | 0.000 |
|                                                                      | C15  | -0.146622682 | -5.018219804 | 1.074808282  | dmol | 1 | C  | 0.000 |
|                                                                      | H16  | -0.457031906 | -6.032360877 | 0.745378683  | dmol | 1 | H  | 0.000 |
|                                                                      | H17  | -0.364309875 | -4.958795722 | 2.166745196  | dmol | 1 | H  | 0.000 |
|                                                                      | C18  | 1.391441108  | -4.924282762 | 0.936421505  | dmol | 1 | C  | 0.000 |
|                                                                      | O19  | 2.123759737  | -5.892254826 | 1.252598823  | dmol | 1 | O  | 0.000 |
|                                                                      | O20  | 1.807452023  | -3.770806787 | 0.493410727  | dmol | 1 | O  | 0.000 |
|                                                                      | O21  | -0.836527318 | -4.022800509 | 0.364294991  | dmol | 1 | O  | 0.000 |
|                                                                      | Fe22 | 0.142030654  | 5.290023065  | 0.064245945  | dmol | 1 | Fe | 0.000 |
|                                                                      | Fe23 | -1.348222169 | 2.633532074  | 0.853793625  | dmol | 1 | Fe | 0.000 |
|                                                                      | Fe24 | 1.407330544  | 2.918265534  | 0.955008483  | dmol | 1 | Fe | 0.000 |
|                                                                      | Fe25 | 0.333543588  | 2.821323239  | -1.461010124 | dmol | 1 | Fe | 0.000 |
|                                                                      | Fe26 | 0.094564569  | 0.263212843  | -1.374156624 | dmol | 1 | Fe | 0.000 |
|                                                                      | Fe27 | -1.796708914 | -0.481620784 | 1.015184166  | dmol | 1 | Fe | 0.000 |
|                                                                      | Fe28 | 1.324465454  | 0.270713935  | 0.966239079  | dmol | 1 | Fe | 0.000 |
|                                                                      | Mo29 | 0.245451253  | -2.251157724 | -0.001672885 | dmol | 1 | Mo | 0.000 |
|                                                                      | S30  | -1.487590146 | 4.144003307  | -0.953292085 | dmol | 1 | S  | 0.000 |
|                                                                      | S31  | -0.068243463 | 4.312984035  | 2.072194782  | dmol | 1 | S  | 0.000 |
|                                                                      | S32  | 0.219283516  | 1.499997559  | -3.245915133 | dmol | 1 | S  | 0.000 |
|                                                                      | S33  | 1.966634098  | 4.341231807  | -0.810535429 | dmol | 1 | S  | 0.000 |
|                                                                      | S34  | -1.662316250 | -1.260454847 | -1.078106507 | dmol | 1 | S  | 0.000 |
|                                                                      | S35  | -3.162536636 | 1.330231651  | 0.280044658  | dmol | 1 | S  | 0.000 |
|                                                                      | S36  | 0.030055610  | -1.339659702 | 2.153261894  | dmol | 1 | S  | 0.000 |
|                                                                      | S37  | 2.048456920  | -0.895839568 | -0.892153306 | dmol | 1 | S  | 0.000 |
|                                                                      | S38  | 2.730813058  | 1.552369465  | 2.172957626  | dmol | 1 | S  | 0.000 |
|                                                                      | N39  | 0.149214772  | 1.663108705  | 0.108133399  | dmol | 1 | N  | 0.000 |
|                                                                      | N40  | -1.329145710 | 1.655519574  | 2.769843459  | dmol | 1 | N  | 0.000 |
|                                                                      | N41  | -2.214165210 | 0.493254063  | 2.791206161  | dmol | 1 | N  | 0.000 |

|                                                                                                                                           |              |              |              |              |      |    |       |       |
|-------------------------------------------------------------------------------------------------------------------------------------------|--------------|--------------|--------------|--------------|------|----|-------|-------|
|                                                                                                                                           | H42          | -0.370508971 | 1.306723762  | 2.910102044  | dmol | 1  | H     | 0.000 |
|                                                                                                                                           | H43          | -2.162203352 | -0.019067853 | 3.680254251  | dmol | 1  | H     | 0.000 |
|                                                                                                                                           | H44          | -1.540600869 | 2.323294268  | 3.521741462  | dmol | 1  | H     | 0.000 |
|                                                                                                                                           | H45          | -3.157203047 | 0.839410596  | 2.534492324  | dmol | 1  | H     | 0.000 |
|                                                                                                                                           | H46          | -2.827796963 | -1.530620206 | 1.424148027  | dmol | 1  | H     | 0.000 |
| <b>TS:</b><br><b>1HN<sub>2</sub>H<sub>4</sub>-a →</b><br><b>1H(NH<sub>2</sub>)<sub>2</sub></b><br>fe26n2h46hted<br>qs_1_4367.43<br>a.cmmf | 46           |              |              |              |      |    |       |       |
|                                                                                                                                           | C1           | 1.245212189  | 8.321281693  | 0.745983994  | dmol | 1  | C     | 0.000 |
|                                                                                                                                           | H2           | 2.231914671  | 8.119732842  | 0.306412931  | dmol | 1  | H     | 0.000 |
|                                                                                                                                           | H3           | 1.087623966  | 9.411344354  | 0.793213219  | dmol | 1  | H     | 0.000 |
|                                                                                                                                           | H4           | 1.222347139  | 7.910434610  | 1.763926962  | dmol | 1  | H     | 0.000 |
|                                                                                                                                           | S5           | -0.113491530 | 7.552694721  | -0.289801792 | dmol | 1  | S     | 0.000 |
|                                                                                                                                           | C6           | 1.482989707  | -3.625345498 | -3.170623035 | dmol | 1  | C     | 0.000 |
|                                                                                                                                           | H7           | 2.418662500  | -3.089135651 | -3.067051612 | dmol | 1  | H     | 0.000 |
|                                                                                                                                           | N8           | 0.501149812  | -3.512056385 | -2.205046358 | dmol | 1  | N     | 0.000 |
|                                                                                                                                           | C9           | 1.055958029  | -4.466610826 | -4.175654762 | dmol | 1  | C     | 0.000 |
|                                                                                                                                           | H10          | 1.517431724  | -4.812345296 | -5.093324950 | dmol | 1  | H     | 0.000 |
|                                                                                                                                           | C11          | -0.514891861 | -4.262208954 | -2.595298329 | dmol | 1  | C     | 0.000 |
|                                                                                                                                           | H12          | -1.430037651 | -4.391128878 | -2.030540394 | dmol | 1  | H     | 0.000 |
|                                                                                                                                           | N13          | -0.227541931 | -4.872119974 | -3.793585148 | dmol | 1  | N     | 0.000 |
|                                                                                                                                           | H14          | -0.857234716 | -5.458725274 | -4.328432426 | dmol | 1  | H     | 0.000 |
|                                                                                                                                           | C15          | -0.111878089 | -4.994002164 | 1.088681831  | dmol | 1  | C     | 0.000 |
|                                                                                                                                           | H16          | -0.411297339 | -6.021087424 | 0.791690230  | dmol | 1  | H     | 0.000 |
|                                                                                                                                           | H17          | -0.342728833 | -4.897171569 | 2.175035584  | dmol | 1  | H     | 0.000 |
|                                                                                                                                           | C18          | 1.426961066  | -4.888955912 | 0.962279778  | dmol | 1  | C     | 0.000 |
|                                                                                                                                           | O19          | 2.166539613  | -5.841762957 | 1.304009756  | dmol | 1  | O     | 0.000 |
|                                                                                                                                           | O20          | 1.836072273  | -3.740177967 | 0.498718851  | dmol | 1  | O     | 0.000 |
|                                                                                                                                           | O21          | -0.799376632 | -4.026508125 | 0.337325396  | dmol | 1  | O     | 0.000 |
|                                                                                                                                           | Fe22         | 0.260178342  | 5.344718784  | -0.012267990 | dmol | 1  | Fe    | 0.000 |
|                                                                                                                                           | Fe23         | -1.372915946 | 2.633612419  | 0.922611304  | dmol | 1  | Fe    | 0.000 |
|                                                                                                                                           | Fe24         | 1.469501435  | 2.929492525  | 0.894910280  | dmol | 1  | Fe    | 0.000 |
|                                                                                                                                           | Fe25         | 0.273503957  | 2.826787654  | -1.450994328 | dmol | 1  | Fe    | 0.000 |
|                                                                                                                                           | Fe26         | 0.091877110  | 0.271600414  | -1.340294656 | dmol | 1  | Fe    | 0.000 |
|                                                                                                                                           | Fe27         | -1.865064175 | -0.563765280 | 0.987718819  | dmol | 1  | Fe    | 0.000 |
|                                                                                                                                           | Fe28         | 1.308783988  | 0.302351319  | 1.003577563  | dmol | 1  | Fe    | 0.000 |
|                                                                                                                                           | Mo29         | 0.263637146  | -2.246684016 | -0.015474288 | dmol | 1  | Mo    | 0.000 |
|                                                                                                                                           | S30          | -1.472212856 | 4.234112370  | -0.884676425 | dmol | 1  | S     | 0.000 |
|                                                                                                                                           | S31          | 0.124449038  | 4.419404965  | 1.999314655  | dmol | 1  | S     | 0.000 |
|                                                                                                                                           | S32          | 0.146657893  | 1.483190424  | -3.222170373 | dmol | 1  | S     | 0.000 |
|                                                                                                                                           | S33          | 1.999125162  | 4.306211862  | -0.928035185 | dmol | 1  | S     | 0.000 |
|                                                                                                                                           | S34          | -1.622169987 | -1.265101712 | -1.143486634 | dmol | 1  | S     | 0.000 |
|                                                                                                                                           | S35          | -3.105510113 | 1.355838852  | 0.255884914  | dmol | 1  | S     | 0.000 |
|                                                                                                                                           | S36          | -0.006590231 | -1.354389222 | 2.132961328  | dmol | 1  | S     | 0.000 |
|                                                                                                                                           | S37          | 2.062015368  | -0.849663192 | -0.857342355 | dmol | 1  | S     | 0.000 |
|                                                                                                                                           | S38          | 2.790786360  | 1.575429395  | 2.119009367  | dmol | 1  | S     | 0.000 |
|                                                                                                                                           | N39          | 0.142018345  | 1.685840094  | 0.151499662  | dmol | 1  | N     | 0.000 |
|                                                                                                                                           | N40          | -1.419886611 | 1.935270066  | 2.695641413  | dmol | 1  | N     | 0.000 |
|                                                                                                                                           | N41          | -2.465306570 | 0.042487762  | 2.702123031  | dmol | 1  | N     | 0.000 |
|                                                                                                                                           | H42          | -0.536436883 | 1.668933755  | 3.154170456  | dmol | 1  | H     | 0.000 |
|                                                                                                                                           | H43          | -2.099435216 | -0.287920699 | 3.597109169  | dmol | 1  | H     | 0.000 |
|                                                                                                                                           | H44          | -2.015127635 | 2.398566342  | 3.389221352  | dmol | 1  | H     | 0.000 |
|                                                                                                                                           | H45          | -3.417974235 | 0.408705135  | 2.780873464  | dmol | 1  | H     | 0.000 |
| H46                                                                                                                                       | -2.918287295 | -1.671175381 | 1.050195957  | dmol         | 1    | H  | 0.000 |       |
| <b>1H(NH<sub>2</sub>)<sub>2</sub></b><br>fe26n2h46hted<br>qs_2a.cmmf                                                                      | 46           |              |              |              |      |    |       |       |
|                                                                                                                                           | C1           | 1.272377758  | 8.357411450  | 0.709442379  | dmol | 1  | C     | 0.000 |
|                                                                                                                                           | H2           | 2.264913751  | 8.163576630  | 0.281335649  | dmol | 1  | H     | 0.000 |
|                                                                                                                                           | H3           | 1.109891866  | 9.447193519  | 0.754712304  | dmol | 1  | H     | 0.000 |
|                                                                                                                                           | H4           | 1.235082579  | 7.943454966  | 1.725290400  | dmol | 1  | H     | 0.000 |
|                                                                                                                                           | S5           | -0.060620925 | 7.568271520  | -0.343885923 | dmol | 1  | S     | 0.000 |
|                                                                                                                                           | C6           | 1.467873130  | -3.571414648 | -3.203838155 | dmol | 1  | C     | 0.000 |
|                                                                                                                                           | H7           | 2.379903711  | -2.993749316 | -3.112760033 | dmol | 1  | H     | 0.000 |
|                                                                                                                                           | N8           | 0.499653264  | -3.506475849 | -2.220435164 | dmol | 1  | N     | 0.000 |
|                                                                                                                                           | C9           | 1.061830544  | -4.426189998 | -4.206431882 | dmol | 1  | C     | 0.000 |
|                                                                                                                                           | H10          | 1.522572066  | -4.747352468 | -5.133532566 | dmol | 1  | H     | 0.000 |
|                                                                                                                                           | C11          | -0.488491084 | -4.299708020 | -2.597322338 | dmol | 1  | C     | 0.000 |
|                                                                                                                                           | H12          | -1.384556329 | -4.476630082 | -2.013771432 | dmol | 1  | H     | 0.000 |
|                                                                                                                                           | N13          | -0.195194723 | -4.889764195 | -3.805064214 | dmol | 1  | N     | 0.000 |
|                                                                                                                                           | H14          | -0.802739881 | -5.507781767 | -4.330283698 | dmol | 1  | H     | 0.000 |
|                                                                                                                                           | C15          | -0.128880547 | -5.019711424 | 1.056039757  | dmol | 1  | C     | 0.000 |
|                                                                                                                                           | H16          | -0.425812323 | -6.041609361 | 0.739141196  | dmol | 1  | H     | 0.000 |
|                                                                                                                                           | H17          | -0.362244158 | -4.941845851 | 2.141633786  | dmol | 1  | H     | 0.000 |
|                                                                                                                                           | C18          | 1.407290435  | -4.907658132 | 0.933304550  | dmol | 1  | C     | 0.000 |
|                                                                                                                                           | O19          | 2.151463394  | -5.860223419 | 1.259051563  | dmol | 1  | O     | 0.000 |
|                                                                                                                                           | O20          | 1.813443239  | -3.747243914 | 0.490551729  | dmol | 1  | O     | 0.000 |
|                                                                                                                                           | O21          | -0.814278255 | -4.033752458 | 0.321853536  | dmol | 1  | O     | 0.000 |
|                                                                                                                                           | Fe22         | 0.364883409  | 5.359146750  | -0.118710954 | dmol | 1  | Fe    | 0.000 |
|                                                                                                                                           | Fe23         | -1.321327904 | 2.633035381  | 0.961585534  | dmol | 1  | Fe    | 0.000 |
| Fe24                                                                                                                                      | 1.560213698  | 2.938771165  | 0.846164614  | dmol         | 1    | Fe | 0.000 |       |

|                                                                                                            |      |              |              |              |      |   |    |       |
|------------------------------------------------------------------------------------------------------------|------|--------------|--------------|--------------|------|---|----|-------|
|                                                                                                            | Fe25 | 0.249761826  | 2.831240365  | -1.446522835 | dmol | 1 | Fe | 0.000 |
|                                                                                                            | Fe26 | 0.090987144  | 0.284227848  | -1.303629357 | dmol | 1 | Fe | 0.000 |
|                                                                                                            | Fe27 | -1.970182351 | -0.631470432 | 1.118647851  | dmol | 1 | Fe | 0.000 |
|                                                                                                            | Fe28 | 1.273938882  | 0.312692604  | 1.070309556  | dmol | 1 | Fe | 0.000 |
|                                                                                                            | Mo29 | 0.252480532  | -2.243749583 | 0.018981435  | dmol | 1 | Mo | 0.000 |
|                                                                                                            | S30  | -1.436260231 | 4.245481557  | -0.833612809 | dmol | 1 | S  | 0.000 |
|                                                                                                            | S31  | 0.338597194  | 4.529148769  | 1.916052895  | dmol | 1 | S  | 0.000 |
|                                                                                                            | S32  | 0.102195260  | 1.460835512  | -3.199143305 | dmol | 1 | S  | 0.000 |
|                                                                                                            | S33  | 2.052480532  | 4.250882198  | -1.057669916 | dmol | 1 | S  | 0.000 |
|                                                                                                            | S34  | -1.624188212 | -1.244831258 | -1.096578117 | dmol | 1 | S  | 0.000 |
|                                                                                                            | S35  | -3.094169672 | 1.336415588  | 0.396512376  | dmol | 1 | S  | 0.000 |
|                                                                                                            | S36  | -0.022637481 | -1.372583143 | 2.171509653  | dmol | 1 | S  | 0.000 |
|                                                                                                            | S37  | 2.052480532  | -0.842323596 | -0.788715237 | dmol | 1 | S  | 0.000 |
|                                                                                                            | S38  | 2.811471047  | 1.580952549  | 2.118922774  | dmol | 1 | S  | 0.000 |
|                                                                                                            | N39  | 0.180784558  | 1.725739401  | 0.162090831  | dmol | 1 | N  | 0.000 |
|                                                                                                            | N40  | -1.361119771 | 2.186676462  | 2.799198327  | dmol | 1 | N  | 0.000 |
|                                                                                                            | N41  | -2.849215568 | -0.564301279 | 2.811256172  | dmol | 1 | N  | 0.000 |
|                                                                                                            | H42  | -0.536806615 | 2.337343700  | 3.382002680  | dmol | 1 | H  | 0.000 |
|                                                                                                            | H43  | -2.192634935 | -0.504727717 | 3.595787920  | dmol | 1 | H  | 0.000 |
|                                                                                                            | H44  | -2.201167891 | 2.442140291  | 3.323357684  | dmol | 1 | H  | 0.000 |
|                                                                                                            | H45  | -3.428010683 | 0.278571965  | 2.845588536  | dmol | 1 | H  | 0.000 |
|                                                                                                            | H46  | -2.812684940 | -1.838112282 | 0.861582249  | dmol | 1 | H  | 0.000 |
| TS:<br>1H(NH <sub>2</sub> ) <sub>2</sub> →<br>NH <sub>2</sub><br>fe2nh26nh26h<br>tfqb9_1_4372.<br>22a.cmmf | 46   |              |              |              |      |   |    |       |
|                                                                                                            | C1   | 1.340471323  | 8.295521420  | 0.775305029  | dmol | 1 | C  | 0.000 |
|                                                                                                            | H2   | 2.304560276  | 8.086534207  | 0.292428818  | dmol | 1 | H  | 0.000 |
|                                                                                                            | H3   | 1.192359591  | 9.386497122  | 0.826117965  | dmol | 1 | H  | 0.000 |
|                                                                                                            | H4   | 1.360060223  | 7.887306915  | 1.794187907  | dmol | 1 | H  | 0.000 |
|                                                                                                            | S5   | -0.068344604 | 7.539160355  | -0.201637700 | dmol | 1 | S  | 0.000 |
|                                                                                                            | C6   | 1.428609575  | -3.607791832 | -3.250705570 | dmol | 1 | C  | 0.000 |
|                                                                                                            | H7   | 2.373617069  | -3.083786490 | -3.171812141 | dmol | 1 | H  | 0.000 |
|                                                                                                            | N8   | 0.477929877  | -3.492836971 | -2.253755966 | dmol | 1 | N  | 0.000 |
|                                                                                                            | C9   | 0.961591455  | -4.433258051 | -4.251255249 | dmol | 1 | C  | 0.000 |
|                                                                                                            | H10  | 1.391588363  | -4.773951042 | -5.186148734 | dmol | 1 | H  | 0.000 |
|                                                                                                            | C11  | -0.556703911 | -4.228560013 | -2.621366914 | dmol | 1 | C  | 0.000 |
|                                                                                                            | H12  | -1.457522910 | -4.353510223 | -2.032777711 | dmol | 1 | H  | 0.000 |
|                                                                                                            | N13  | -0.313380217 | -4.829109841 | -3.834983263 | dmol | 1 | N  | 0.000 |
|                                                                                                            | H14  | -0.965043229 | -5.404044668 | -4.356437010 | dmol | 1 | H  | 0.000 |
|                                                                                                            | C15  | -0.066863328 | -4.982360309 | 1.048938585  | dmol | 1 | C  | 0.000 |
|                                                                                                            | H16  | -0.383730006 | -5.997034677 | 0.731467704  | dmol | 1 | H  | 0.000 |
|                                                                                                            | H17  | -0.268464923 | -4.908579475 | 2.141155928  | dmol | 1 | H  | 0.000 |
|                                                                                                            | C18  | 1.466335528  | -4.880672151 | 0.882096234  | dmol | 1 | C  | 0.000 |
|                                                                                                            | O19  | 2.212638342  | -5.842765017 | 1.174350905  | dmol | 1 | O  | 0.000 |
|                                                                                                            | O20  | 1.865189413  | -3.717060766 | 0.441193996  | dmol | 1 | O  | 0.000 |
|                                                                                                            | O21  | -0.769580376 | -3.990086852 | 0.341179056  | dmol | 1 | O  | 0.000 |
|                                                                                                            | Fe22 | 0.294413599  | 5.331817713  | -0.006105012 | dmol | 1 | Fe | 0.000 |
|                                                                                                            | Fe23 | -1.322898083 | 2.573936181  | 0.952401391  | dmol | 1 | Fe | 0.000 |
|                                                                                                            | Fe24 | 1.523810102  | 2.917521135  | 0.876577371  | dmol | 1 | Fe | 0.000 |
|                                                                                                            | Fe25 | 0.263479640  | 2.854075983  | -1.447163085 | dmol | 1 | Fe | 0.000 |
|                                                                                                            | Fe26 | 0.090802092  | 0.280539993  | -1.361642776 | dmol | 1 | Fe | 0.000 |
|                                                                                                            | Fe27 | -1.884988689 | -0.491216122 | 1.106421791  | dmol | 1 | Fe | 0.000 |
|                                                                                                            | Fe28 | 1.336551458  | 0.307627485  | 0.983961236  | dmol | 1 | Fe | 0.000 |
|                                                                                                            | Mo29 | 0.287800976  | -2.213524410 | 0.002693273  | dmol | 1 | Mo | 0.000 |
|                                                                                                            | S30  | -1.476493015 | 4.225247543  | -0.813017848 | dmol | 1 | S  | 0.000 |
|                                                                                                            | S31  | 0.230128625  | 4.429849174  | 1.985306084  | dmol | 1 | S  | 0.000 |
|                                                                                                            | S32  | 0.156768735  | 1.527541447  | -3.229287777 | dmol | 1 | S  | 0.000 |
|                                                                                                            | S33  | 2.015030975  | 4.296293595  | -0.946433493 | dmol | 1 | S  | 0.000 |
|                                                                                                            | S34  | -1.647551413 | -1.255447440 | -1.040917516 | dmol | 1 | S  | 0.000 |
|                                                                                                            | S35  | -3.125562927 | 1.334570500  | 0.431862906  | dmol | 1 | S  | 0.000 |
|                                                                                                            | S36  | 0.054869143  | -1.308994000 | 2.156880108  | dmol | 1 | S  | 0.000 |
|                                                                                                            | S37  | 2.063735832  | -0.833552670 | -0.902896155 | dmol | 1 | S  | 0.000 |
|                                                                                                            | S38  | 2.857058785  | 1.562758441  | 2.061572916  | dmol | 1 | S  | 0.000 |
|                                                                                                            | N39  | 0.182933680  | 1.703484601  | 0.126483140  | dmol | 1 | N  | 0.000 |
|                                                                                                            | N40  | -1.309791173 | 2.008068585  | 2.759154840  | dmol | 1 | N  | 0.000 |
|                                                                                                            | N41  | -2.973611633 | -0.681189291 | 2.860414767  | dmol | 1 | N  | 0.000 |
|                                                                                                            | H42  | -0.465922534 | 2.249267089  | 3.285194360  | dmol | 1 | H  | 0.000 |
|                                                                                                            | H43  | -2.172114068 | -0.477877665 | 3.470298857  | dmol | 1 | H  | 0.000 |
|                                                                                                            | H44  | -2.137376280 | 2.290480479  | 3.294826742  | dmol | 1 | H  | 0.000 |
|                                                                                                            | H45  | -3.459113724 | 0.217943644  | 2.745117127  | dmol | 1 | H  | 0.000 |
|                                                                                                            | H46  | -2.907277997 | -1.518833270 | 1.360754884  | dmol | 1 | H  | 0.000 |
| NH <sub>2</sub><br>fe2nh26nh26h<br>tfqa9_3a.cmm                                                            | 46   |              |              |              |      |   |    |       |
|                                                                                                            | C1   | 1.379637249  | 8.338798034  | 0.740028783  | dmol | 1 | C  | 0.000 |
|                                                                                                            | H2   | 2.349193464  | 8.137999042  | 0.265423482  | dmol | 1 | H  | 0.000 |
|                                                                                                            | H3   | 1.229265173  | 9.428748252  | 0.806874903  | dmol | 1 | H  | 0.000 |
|                                                                                                            | H4   | 1.388019988  | 7.915876192  | 1.752320894  | dmol | 1 | H  | 0.000 |
|                                                                                                            | S5   | -0.014364841 | 7.579175401  | -0.253538086 | dmol | 1 | S  | 0.000 |
|                                                                                                            | C6   | 1.376373500  | -3.558119030 | -3.228156809 | dmol | 1 | C  | 0.000 |
|                                                                                                            | H7   | 2.310294568  | -3.012538847 | -3.162036482 | dmol | 1 | H  | 0.000 |

|      |                                                   |              |              |              |              |      |       |       |       |
|------|---------------------------------------------------|--------------|--------------|--------------|--------------|------|-------|-------|-------|
| f    | N8                                                | 0.433016848  | -3.461638986 | -2.220252127 | dmol         | 1    | N     | 0.000 |       |
|      | C9                                                | 0.919202724  | -4.396702790 | -4.221634429 | dmol         | 1    | C     | 0.000 |       |
|      | H10                                               | 1.346699030  | -4.728133055 | -5.161472568 | dmol         | 1    | H     | 0.000 |       |
|      | C11                                               | -0.585156490 | -4.224015514 | -2.575549936 | dmol         | 1    | C     | 0.000 |       |
|      | H12                                               | -1.474050526 | -4.376575125 | -1.974683902 | dmol         | 1    | H     | 0.000 |       |
|      | N13                                               | -0.341042949 | -4.822978321 | -3.792457682 | dmol         | 1    | N     | 0.000 |       |
|      | H14                                               | -0.979898604 | -5.414403828 | -4.311649432 | dmol         | 1    | H     | 0.000 |       |
|      | C15                                               | -0.104536491 | -4.946124006 | 1.079379640  | dmol         | 1    | C     | 0.000 |       |
|      | H16                                               | -1.835602643 | -5.925391952 | 0.669313511  | dmol         | 1    | H     | 0.000 |       |
|      | H17                                               | -0.289586270 | -4.997150881 | 2.176937543  | dmol         | 1    | H     | 0.000 |       |
|      | C18                                               | 1.427081008  | -4.857552378 | 0.898860450  | dmol         | 1    | C     | 0.000 |       |
|      | O19                                               | 2.166326750  | -5.836870632 | 1.147628507  | dmol         | 1    | O     | 0.000 |       |
|      | O20                                               | 1.835600240  | -3.682857306 | 0.490195001  | dmol         | 1    | O     | 0.000 |       |
|      | O21                                               | -0.803104282 | -3.876480883 | 0.496584329  | dmol         | 1    | O     | 0.000 |       |
|      | Fe22                                              | 0.374892355  | 5.375328333  | -0.026392276 | dmol         | 1    | Fe    | 0.000 |       |
|      | Fe23                                              | -1.234226580 | 2.750694573  | 0.881864856  | dmol         | 1    | Fe    | 0.000 |       |
|      | Fe24                                              | 1.625475235  | 2.933720467  | 0.803503729  | dmol         | 1    | Fe    | 0.000 |       |
|      | Fe25                                              | 0.175577123  | 2.872846892  | -1.483235148 | dmol         | 1    | Fe    | 0.000 |       |
|      | Fe26                                              | 0.118850294  | 0.312679492  | -1.415359109 | dmol         | 1    | Fe    | 0.000 |       |
|      | Fe27                                              | -1.189255152 | 0.267479677  | 1.133240894  | dmol         | 1    | Fe    | 0.000 |       |
|      | Fe28                                              | 1.501792596  | 0.303019559  | 0.917569704  | dmol         | 1    | Fe    | 0.000 |       |
|      | Mo29                                              | 0.325463784  | -2.108146920 | 0.106246059  | dmol         | 1    | Mo    | 0.000 |       |
|      | S30                                               | -1.465237985 | 4.356548053  | -0.798883082 | dmol         | 1    | S     | 0.000 |       |
|      | S31                                               | 0.271779579  | 4.374365738  | 1.968941651  | dmol         | 1    | S     | 0.000 |       |
|      | S32                                               | 0.009597001  | 1.534268808  | -3.281270692 | dmol         | 1    | S     | 0.000 |       |
|      | S33                                               | 2.013777876  | 4.276836359  | -1.058912753 | dmol         | 1    | S     | 0.000 |       |
|      | S34                                               | -1.625598303 | -1.069633943 | -0.767643114 | dmol         | 1    | S     | 0.000 |       |
|      | S35                                               | -3.085984556 | 1.536538553  | 0.421411788  | dmol         | 1    | S     | 0.000 |       |
|      | S36                                               | 0.268308030  | -1.143668937 | 2.266301799  | dmol         | 1    | S     | 0.000 |       |
|      | S37                                               | 2.070365706  | -0.814310041 | -0.999496758 | dmol         | 1    | S     | 0.000 |       |
|      | S38                                               | 3.019612358  | 1.587720493  | 1.942671934  | dmol         | 1    | S     | 0.000 |       |
|      | N39                                               | 0.209501924  | 1.722681428  | 0.092023189  | dmol         | 1    | N     | 0.000 |       |
|      | N40                                               | -1.291996379 | 1.680166570  | 2.547994481  | dmol         | 1    | N     | 0.000 |       |
|      | N41                                               | -3.359938899 | -1.029032081 | 2.946111196  | dmol         | 1    | N     | 0.000 |       |
|      | H42                                               | -0.531753867 | 1.877069773  | 3.196094037  | dmol         | 1    | H     | 0.000 |       |
|      | H43                                               | -2.422285640 | -0.860511004 | 3.336528710  | dmol         | 1    | H     | 0.000 |       |
|      | H44                                               | -2.184280534 | 1.790135280  | 3.027655558  | dmol         | 1    | H     | 0.000 |       |
|      | H45                                               | -3.563981421 | -0.138204086 | 2.460887124  | dmol         | 1    | H     | 0.000 |       |
|      | H46                                               | -3.162801990 | -1.671656949 | 2.160030638  | dmol         | 1    | H     | 0.000 |       |
|      | 1HNH <sub>2</sub><br>fe26nh23bhtka<br>32s_2a.cmmf | 43           |              |              |              |      |       |       |       |
|      |                                                   | C1           | 1.373791381  | 8.290189531  | 0.785926399  | dmol | 1     | C     | 0.000 |
|      |                                                   | H2           | 2.282831092  | 7.983920698  | 0.251350542  | dmol | 1     | H     | 0.000 |
|      |                                                   | H3           | 1.298346368  | 9.390156224  | 0.766862860  | dmol | 1     | H     | 0.000 |
|      |                                                   | H4           | 1.448714383  | 7.957274572  | 1.829816632  | dmol | 1     | H     | 0.000 |
|      |                                                   | S5           | -0.142965777 | 7.551376019  | -0.031394170 | dmol | 1     | S     | 0.000 |
|      |                                                   | C6           | 0.938686157  | -3.550324319 | -2.920093496 | dmol | 1     | C     | 0.000 |
| H7   |                                                   | 1.847244833  | -2.960873181 | -2.907055635 | dmol         | 1    | H     | 0.000 |       |
| N8   |                                                   | 0.013574531  | -3.430840752 | -1.897075820 | dmol         | 1    | N     | 0.000 |       |
| C9   |                                                   | 0.492081844  | -4.465860300 | -3.845551100 | dmol         | 1    | C     | 0.000 |       |
| H10  |                                                   | 0.915647895  | -4.835999107 | -4.771359862 | dmol         | 1    | H     | 0.000 |       |
| C11  |                                                   | -0.988730806 | -4.250167229 | -2.181475663 | dmol         | 1    | C     | 0.000 |       |
| H12  |                                                   | -1.850769391 | -4.394396817 | -1.541481686 | dmol         | 1    | H     | 0.000 |       |
| N13  |                                                   | -0.742903448 | -4.908489322 | -3.362959651 | dmol         | 1    | N     | 0.000 |       |
| H14  |                                                   | -1.355581536 | -5.584510379 | -3.802923768 | dmol         | 1    | H     | 0.000 |       |
| C15  |                                                   | -0.628265572 | -4.868563061 | 1.405907449  | dmol         | 1    | C     | 0.000 |       |
| H16  |                                                   | -1.048279105 | -5.845549642 | 1.082445246  | dmol         | 1    | H     | 0.000 |       |
| H17  |                                                   | -0.836760583 | -4.782943397 | 2.496679214  | dmol         | 1    | H     | 0.000 |       |
| C18  |                                                   | 0.909515694  | -4.950928085 | 1.249974169  | dmol         | 1    | C     | 0.000 |       |
| O19  |                                                   | 1.520905911  | -5.989536312 | 1.602984582  | dmol         | 1    | O     | 0.000 |       |
| O20  |                                                   | 1.448562984  | -3.882732425 | 0.739929271  | dmol         | 1    | O     | 0.000 |       |
| O21  |                                                   | -1.212327721 | -3.806819912 | 0.696039545  | dmol         | 1    | O     | 0.000 |       |
| Fe22 |                                                   | 0.135786169  | 5.331138655  | 0.188913217  | dmol         | 1    | Fe    | 0.000 |       |
| Fe23 |                                                   | -1.449139268 | 2.783934123  | 1.051864245  | dmol         | 1    | Fe    | 0.000 |       |
| Fe24 |                                                   | 1.285244237  | 2.853593174  | 0.972974458  | dmol         | 1    | Fe    | 0.000 |       |
| Fe25 |                                                   | 0.040428163  | 2.831833823  | -1.379083732 | dmol         | 1    | Fe    | 0.000 |       |
| Fe26 |                                                   | -0.074965017 | 0.233703528  | -1.327022184 | dmol         | 1    | Fe    | 0.000 |       |
| Fe27 |                                                   | -1.688875553 | 0.351306898  | 0.817664497  | dmol         | 1    | Fe    | 0.000 |       |
| Fe28 |                                                   | 1.219381517  | 0.219488081  | 1.027034424  | dmol         | 1    | Fe    | 0.000 |       |
| Mo29 |                                                   | 0.056779357  | -2.211073474 | 0.146996154  | dmol         | 1    | Mo    | 0.000 |       |
| S30  |                                                   | -1.618452629 | 4.337272247  | -0.766991827 | dmol         | 1    | S     | 0.000 |       |
| S31  |                                                   | -0.049384827 | 4.289970048  | 2.158316156  | dmol         | 1    | S     | 0.000 |       |
| S32  |                                                   | -0.025688952 | 1.504422516  | -3.180415441 | dmol         | 1    | S     | 0.000 |       |
| S33  |                                                   | 1.803589167  | 4.263985615  | -0.803082674 | dmol         | 1    | S     | 0.000 |       |
| S34  |                                                   | -1.913554475 | -1.133388170 | -0.813357241 | dmol         | 1    | S     | 0.000 |       |
| S35  |                                                   | -3.430413205 | 1.717013680  | 0.509729459  | dmol         | 1    | S     | 0.000 |       |
| S36  |                                                   | 0.497890112  | -1.526407545 | 2.557763250  | dmol         | 1    | S     | 0.000 |       |
| S37  |                                                   | 1.872255985  | -0.956558877 | -0.849301449 | dmol         | 1    | S     | 0.000 |       |
| S38  | 2.781841562                                       | 1.539552413  | 1.975988711  | dmol         | 1            | S    | 0.000 |       |       |

|                                                                                               |              |              |              |              |      |    |       |       |
|-----------------------------------------------------------------------------------------------|--------------|--------------|--------------|--------------|------|----|-------|-------|
|                                                                                               | N39          | -0.069866194 | 1.618615519  | 0.204711361  | dmol | 1  | N     | 0.000 |
|                                                                                               | N40          | -1.481681416 | 1.407101131  | 2.548446590  | dmol | 1  | N     | 0.000 |
|                                                                                               | H41          | -0.636502458 | -0.953756358 | 3.045886702  | dmol | 1  | H     | 0.000 |
|                                                                                               | H42          | -2.306136049 | 1.470044514  | 3.147693961  | dmol | 1  | H     | 0.000 |
|                                                                                               | H43          | -0.631855360 | 1.363825654  | 3.118726301  | dmol | 1  | H     | 0.000 |
| TS:<br><b>1HNH<sub>2</sub>→<br/>NH<sub>3</sub></b><br>fe26nh23bhtk<br>329_1_4152.9<br>1a.cmmf | 43           |              |              |              |      |    |       |       |
|                                                                                               | C1           | 1.322448441  | 8.199042962  | 0.775222637  | dmol | 1  | C     | 0.000 |
|                                                                                               | H2           | 2.228496192  | 7.887106328  | 0.236643939  | dmol | 1  | H     | 0.000 |
|                                                                                               | H3           | 1.250647449  | 9.297921070  | 0.754817291  | dmol | 1  | H     | 0.000 |
|                                                                                               | H4           | 1.403426088  | 7.866128321  | 1.819560506  | dmol | 1  | H     | 0.000 |
|                                                                                               | S5           | -0.209743370 | 7.477787721  | -0.027028754 | dmol | 1  | S     | 0.000 |
|                                                                                               | C6           | 0.997395140  | -3.642925824 | -2.945580406 | dmol | 1  | C     | 0.000 |
|                                                                                               | H7           | 1.929322390  | -3.091811136 | -2.932365742 | dmol | 1  | H     | 0.000 |
|                                                                                               | N8           | 0.085740925  | -3.508146740 | -1.913024085 | dmol | 1  | N     | 0.000 |
|                                                                                               | C9           | 0.506769471  | -4.517695258 | -3.888991614 | dmol | 1  | C     | 0.000 |
|                                                                                               | H10          | 0.904419294  | -4.883146981 | -4.828816034 | dmol | 1  | H     | 0.000 |
|                                                                                               | C11          | -0.948348086 | -4.282518092 | -2.205306914 | dmol | 1  | C     | 0.000 |
|                                                                                               | H12          | -1.815792483 | -4.398980453 | -1.567220512 | dmol | 1  | H     | 0.000 |
|                                                                                               | N13          | -0.738781683 | -4.925685709 | -3.401993102 | dmol | 1  | N     | 0.000 |
|                                                                                               | H14          | -1.395585113 | -5.540805175 | -3.867655594 | dmol | 1  | H     | 0.000 |
|                                                                                               | C15          | -0.684867328 | -4.823188339 | 1.370437676  | dmol | 1  | C     | 0.000 |
|                                                                                               | H16          | -1.154568417 | -5.776553031 | 1.046092029  | dmol | 1  | H     | 0.000 |
|                                                                                               | H17          | -0.867141315 | -4.738265078 | 2.465919838  | dmol | 1  | H     | 0.000 |
|                                                                                               | C18          | 0.846750289  | -4.959034572 | 1.196187911  | dmol | 1  | C     | 0.000 |
|                                                                                               | O19          | 1.422577714  | -6.041175991 | 1.468254858  | dmol | 1  | O     | 0.000 |
|                                                                                               | O20          | 1.423498202  | -3.868998023 | 0.771370295  | dmol | 1  | O     | 0.000 |
|                                                                                               | O21          | -1.240862230 | -3.740800234 | 0.676602547  | dmol | 1  | O     | 0.000 |
|                                                                                               | Fe22         | 0.080570938  | 5.265561609  | 0.211868633  | dmol | 1  | Fe    | 0.000 |
|                                                                                               | Fe23         | -1.424375538 | 2.611174798  | 1.118223475  | dmol | 1  | Fe    | 0.000 |
|                                                                                               | Fe24         | 1.366812879  | 2.858056994  | 0.968701679  | dmol | 1  | Fe    | 0.000 |
|                                                                                               | Fe25         | 0.022645860  | 2.808170691  | -1.341703237 | dmol | 1  | Fe    | 0.000 |
|                                                                                               | Fe26         | 0.027254117  | 0.250278653  | -1.312401259 | dmol | 1  | Fe    | 0.000 |
|                                                                                               | Fe27         | -1.583214580 | 0.096512884  | 0.910387681  | dmol | 1  | Fe    | 0.000 |
|                                                                                               | Fe28         | 1.368572686  | 0.234821920  | 0.996692997  | dmol | 1  | Fe    | 0.000 |
|                                                                                               | Mo29         | 0.073150143  | -2.183207030 | 0.129225387  | dmol | 1  | Mo    | 0.000 |
|                                                                                               | S30          | -1.685531536 | 4.206557938  | -0.659260585 | dmol | 1  | S     | 0.000 |
|                                                                                               | S31          | -0.026104880 | 4.219202523  | 2.181224335  | dmol | 1  | S     | 0.000 |
|                                                                                               | S32          | 0.021412828  | 1.525164255  | -3.153622469 | dmol | 1  | S     | 0.000 |
| S33                                                                                           | 1.759507519  | 4.272409017  | -0.837039627 | dmol         | 1    | S  | 0.000 |       |
| S34                                                                                           | -1.827761586 | -1.121367494 | -0.889648043 | dmol         | 1    | S  | 0.000 |       |
| S35                                                                                           | -3.373242136 | 1.443777276  | 0.651427046  | dmol         | 1    | S  | 0.000 |       |
| S36                                                                                           | 0.185245675  | -1.223232002 | 2.488497569  | dmol         | 1    | S  | 0.000 |       |
| S37                                                                                           | 1.945196168  | -0.997802717 | -0.856232577 | dmol         | 1    | S  | 0.000 |       |
| S38                                                                                           | 2.948619307  | 1.571083481  | 1.890148095  | dmol         | 1    | S  | 0.000 |       |
| N39                                                                                           | 0.023714642  | 1.599172169  | 0.235358740  | dmol         | 1    | N  | 0.000 |       |
| N40                                                                                           | -1.402973716 | 1.412773135  | 2.799246094  | dmol         | 1    | N  | 0.000 |       |
| H41                                                                                           | -0.793896716 | -0.100868012 | 2.789758448  | dmol         | 1    | H  | 0.000 |       |
| H42                                                                                           | -2.313187180 | 1.511805083  | 3.270508976  | dmol         | 1    | H  | 0.000 |       |
| H43                                                                                           | -0.658216463 | 1.751699066  | 3.405511871  | dmol         | 1    | H  | 0.000 |       |
| NH <sub>3</sub><br>fe26nh23bhtf9<br>_4a.cmmf                                                  | 43           |              |              |              |      |    |       |       |
|                                                                                               | C1           | 1.289862998  | 8.187970309  | 0.704440249  | dmol | 1  | C     | 0.000 |
|                                                                                               | H2           | 2.180893890  | 7.886387981  | 0.137219824  | dmol | 1  | H     | 0.000 |
|                                                                                               | H3           | 1.213573755  | 9.288040258  | 0.693850987  | dmol | 1  | H     | 0.000 |
|                                                                                               | H4           | 1.404024421  | 7.848398644  | 1.742863560  | dmol | 1  | H     | 0.000 |
|                                                                                               | S5           | -0.257310377 | 7.450731715  | -0.059067461 | dmol | 1  | S     | 0.000 |
|                                                                                               | C6           | 0.977015046  | -3.750516841 | -3.129155080 | dmol | 1  | C     | 0.000 |
|                                                                                               | H7           | 1.898227551  | -3.180401262 | -3.154516164 | dmol | 1  | H     | 0.000 |
|                                                                                               | N8           | 0.125831549  | -3.661736775 | -2.044035003 | dmol | 1  | N     | 0.000 |
|                                                                                               | C9           | 0.447689616  | -4.610563675 | -4.067106002 | dmol | 1  | C     | 0.000 |
|                                                                                               | H10          | 0.795054972  | -4.943852030 | -5.038248881 | dmol | 1  | H     | 0.000 |
|                                                                                               | C11          | -0.908362344 | -4.447133343 | -2.294743318 | dmol | 1  | C     | 0.000 |
|                                                                                               | H12          | -1.730197824 | -4.585725884 | -1.600265681 | dmol | 1  | H     | 0.000 |
|                                                                                               | N13          | -0.758857922 | -5.056258317 | -3.517086404 | dmol | 1  | N     | 0.000 |
|                                                                                               | H14          | -1.446255558 | -5.646884989 | -3.969800806 | dmol | 1  | H     | 0.000 |
|                                                                                               | C15          | -0.669915197 | -4.843893393 | 1.334750584  | dmol | 1  | C     | 0.000 |
|                                                                                               | H16          | -1.072107449 | -5.860209000 | 1.141488702  | dmol | 1  | H     | 0.000 |
|                                                                                               | H17          | -0.879972761 | -4.612216407 | 2.404651601  | dmol | 1  | H     | 0.000 |
|                                                                                               | C18          | 0.872364505  | -4.908784879 | 1.203163849  | dmol | 1  | C     | 0.000 |
|                                                                                               | O19          | 1.506307814  | -5.927171182 | 1.572091570  | dmol | 1  | O     | 0.000 |
|                                                                                               | O20          | 1.399568835  | -3.827067564 | 0.702730966  | dmol | 1  | O     | 0.000 |
|                                                                                               | O21          | -1.260558490 | -3.894488353 | 0.484579412  | dmol | 1  | O     | 0.000 |
|                                                                                               | Fe22         | 0.102941798  | 5.230602476  | 0.179143781  | dmol | 1  | Fe    | 0.000 |
|                                                                                               | Fe23         | -1.305268303 | 2.608088629  | 1.320639502  | dmol | 1  | Fe    | 0.000 |
|                                                                                               | Fe24         | 1.389156804  | 2.758852713  | 0.951001875  | dmol | 1  | Fe    | 0.000 |
|                                                                                               | Fe25         | 0.012542685  | 2.747267764  | -1.320764988 | dmol | 1  | Fe    | 0.000 |
|                                                                                               | Fe26         | 0.042442216  | 0.206927764  | -1.440190596 | dmol | 1  | Fe    | 0.000 |
| Fe27                                                                                          | -1.588519176 | -0.030688135 | 0.703438502  | dmol         | 1    | Fe | 0.000 |       |

|                                                                                              |              |              |              |              |      |   |       |       |
|----------------------------------------------------------------------------------------------|--------------|--------------|--------------|--------------|------|---|-------|-------|
|                                                                                              | Fe28         | 1.206279170  | 0.093622702  | 0.973720991  | dmol | 1 | Fe    | 0.000 |
|                                                                                              | Mo29         | -0.013821625 | -2.243872126 | 0.001562645  | dmol | 1 | Mo    | 0.000 |
|                                                                                              | S30          | -1.699280128 | 4.080505187  | -0.528937448 | dmol | 1 | S     | 0.000 |
|                                                                                              | S31          | 0.167294687  | 4.274651071  | 2.183234754  | dmol | 1 | S     | 0.000 |
|                                                                                              | S32          | 0.076396408  | 1.558160589  | -3.216628315 | dmol | 1 | S     | 0.000 |
|                                                                                              | S33          | 1.772489981  | 4.193114729  | -0.858267326 | dmol | 1 | S     | 0.000 |
|                                                                                              | S34          | -1.813030833 | -1.154178777 | -1.237000564 | dmol | 1 | S     | 0.000 |
|                                                                                              | S35          | -3.275660255 | 1.334168960  | 1.242587556  | dmol | 1 | S     | 0.000 |
|                                                                                              | S36          | -0.264718924 | -1.261913606 | 2.191233588  | dmol | 1 | S     | 0.000 |
|                                                                                              | S37          | 1.904633620  | -1.040200774 | -0.896608308 | dmol | 1 | S     | 0.000 |
|                                                                                              | S38          | 2.792480162  | 1.352162077  | 1.998470521  | dmol | 1 | S     | 0.000 |
|                                                                                              | N39          | -0.024012651 | 1.548277710  | 0.242872649  | dmol | 1 | N     | 0.000 |
|                                                                                              | N40          | -1.144313297 | 1.818285227  | 3.335231654  | dmol | 1 | N     | 0.000 |
|                                                                                              | H41          | -0.832390281 | 0.841313972  | 3.302640677  | dmol | 1 | H     | 0.000 |
|                                                                                              | H42          | -2.108350062 | 1.823317209  | 3.679037153  | dmol | 1 | H     | 0.000 |
|                                                                                              | H43          | -0.524169026 | 2.356909628  | 3.945775192  | dmol | 1 | H     | 0.000 |
| TS: NH <sub>3</sub> →<br>FeMo-co +<br>NH <sub>3</sub><br>fe2nh3ti329_1<br>_4189.45a.cm<br>mf | 43           |              |              |              |      |   |       |       |
|                                                                                              | C1           | 1.165604001  | 8.108278123  | 0.871973068  | dmol | 1 | C     | 0.000 |
|                                                                                              | H2           | 2.171610660  | 7.902834934  | 0.479456395  | dmol | 1 | H     | 0.000 |
|                                                                                              | H3           | 1.028844426  | 9.199247578  | 0.953768395  | dmol | 1 | H     | 0.000 |
|                                                                                              | H4           | 1.081091155  | 7.659369063  | 1.869642166  | dmol | 1 | H     | 0.000 |
|                                                                                              | S5           | -0.165805544 | 7.412831526  | -0.254087686 | dmol | 1 | S     | 0.000 |
|                                                                                              | C6           | 1.063982177  | -3.666081366 | -3.139035348 | dmol | 1 | C     | 0.000 |
|                                                                                              | H7           | 1.988838647  | -3.102137510 | -3.113955640 | dmol | 1 | H     | 0.000 |
|                                                                                              | N8           | 0.175797978  | -3.598878452 | -2.081988823 | dmol | 1 | N     | 0.000 |
|                                                                                              | C9           | 0.561417267  | -4.493006060 | -4.120434212 | dmol | 1 | C     | 0.000 |
|                                                                                              | H10          | 0.940734057  | -4.800398349 | -5.087958352 | dmol | 1 | H     | 0.000 |
|                                                                                              | C11          | -0.856740110 | -4.363731766 | -2.394777382 | dmol | 1 | C     | 0.000 |
|                                                                                              | H12          | -1.712765430 | -4.514804309 | -1.746492998 | dmol | 1 | H     | 0.000 |
|                                                                                              | N13          | -0.669500680 | -4.939916433 | -3.629662426 | dmol | 1 | N     | 0.000 |
|                                                                                              | H14          | -1.338957994 | -5.520246494 | -4.121832073 | dmol | 1 | H     | 0.000 |
|                                                                                              | C15          | -0.504527752 | -4.994763723 | 1.135799073  | dmol | 1 | C     | 0.000 |
|                                                                                              | H16          | -0.827890296 | -5.976622093 | 0.727492187  | dmol | 1 | H     | 0.000 |
|                                                                                              | H17          | -0.748517600 | -5.011676899 | 2.223511905  | dmol | 1 | H     | 0.000 |
|                                                                                              | C18          | 1.039941031  | -4.936593613 | 1.043087416  | dmol | 1 | C     | 0.000 |
|                                                                                              | O19          | 1.731807187  | -5.945991164 | 1.320144054  | dmol | 1 | O     | 0.000 |
|                                                                                              | O20          | 1.502059397  | -3.774794202 | 0.679074574  | dmol | 1 | O     | 0.000 |
|                                                                                              | O21          | -1.157234493 | -3.936991745 | 0.480137437  | dmol | 1 | O     | 0.000 |
|                                                                                              | Fe22         | 0.017746367  | 5.197607603  | 0.039581760  | dmol | 1 | Fe    | 0.000 |
|                                                                                              | Fe23         | -1.415850198 | 2.644270906  | 1.128973301  | dmol | 1 | Fe    | 0.000 |
|                                                                                              | Fe24         | 1.281263209  | 2.794534491  | 0.902962720  | dmol | 1 | Fe    | 0.000 |
|                                                                                              | Fe25         | -0.092861085 | 2.713012778  | -1.402661844 | dmol | 1 | Fe    | 0.000 |
|                                                                                              | Fe26         | -0.022300658 | 0.179093613  | -1.464066469 | dmol | 1 | Fe    | 0.000 |
|                                                                                              | Fe27         | -1.552972194 | -0.006781717 | 0.768918145  | dmol | 1 | Fe    | 0.000 |
|                                                                                              | Fe28         | 1.187809103  | 0.153179974  | 0.981160428  | dmol | 1 | Fe    | 0.000 |
|                                                                                              | Mo29         | 0.025210830  | -2.228525284 | 0.045972936  | dmol | 1 | Mo    | 0.000 |
|                                                                                              | S30          | -1.806091132 | 4.076489770  | -0.664775183 | dmol | 1 | S     | 0.000 |
|                                                                                              | S31          | -0.023729479 | 4.272756263  | 4.207524389  | dmol | 1 | S     | 0.000 |
| S32                                                                                          | -0.094861023 | 1.485709067  | -3.268833321 | dmol         | 1    | S | 0.000 |       |
| S33                                                                                          | 1.684386520  | 4.138364631  | -0.961763728 | dmol         | 1    | S | 0.000 |       |
| S34                                                                                          | -1.842268991 | -1.191810132 | -1.136029839 | dmol         | 1    | S | 0.000 |       |
| S35                                                                                          | -3.268321427 | 1.341604093  | 1.309498260  | dmol         | 1    | S | 0.000 |       |
| S36                                                                                          | -0.202216056 | -1.235133535 | 2.224897035  | dmol         | 1    | S | 0.000 |       |
| S37                                                                                          | 1.891726349  | -0.975841462 | -0.892510691 | dmol         | 1    | S | 0.000 |       |
| S38                                                                                          | 2.736886608  | 1.474865046  | 1.982357406  | dmol         | 1    | S | 0.000 |       |
| N39                                                                                          | -0.098149177 | 1.554839380  | 0.183210514  | dmol         | 1    | N | 0.000 |       |
| N40                                                                                          | -1.202289990 | 1.841578110  | 3.797971478  | dmol         | 1    | N | 0.000 |       |
| H41                                                                                          | -0.795180201 | 0.904852321  | 3.738173333  | dmol         | 1    | H | 0.000 |       |
| H42                                                                                          | -0.688349049 | 2.404540472  | 4.479071911  | dmol         | 1    | H | 0.000 |       |
| H43                                                                                          | -2.189376411 | 1.754866563  | 4.046505725  | dmol         | 1    | H | 0.000 |       |
| FeMo-co +<br>NH <sub>3</sub><br>fe2nh3th329_<br>2_4192.84a.c<br>mmf                          | 43           |              |              |              |      |   |       |       |
|                                                                                              | C1           | 1.159530472  | 8.112622768  | 0.894026211  | dmol | 1 | C     | 0.000 |
|                                                                                              | H2           | 2.098319472  | 7.870596175  | 0.375942166  | dmol | 1 | H     | 0.000 |
|                                                                                              | H3           | 1.042738183  | 9.207069977  | 0.926334543  | dmol | 1 | H     | 0.000 |
|                                                                                              | H4           | 1.211480198  | 7.734356864  | 1.924951215  | dmol | 1 | H     | 0.000 |
|                                                                                              | S5           | -0.310047016 | 7.393405355  | -0.022052847 | dmol | 1 | S     | 0.000 |
|                                                                                              | C6           | 0.996329932  | -3.608189277 | -3.192545976 | dmol | 1 | C     | 0.000 |
|                                                                                              | H7           | 1.902516659  | -3.014765445 | -3.182250564 | dmol | 1 | H     | 0.000 |
|                                                                                              | N8           | 0.124919386  | -3.571410020 | -2.120090087 | dmol | 1 | N     | 0.000 |
|                                                                                              | C9           | 0.500670135  | -4.448478741 | -4.165247747 | dmol | 1 | C     | 0.000 |
|                                                                                              | H10          | 0.872955535  | -4.745242226 | -5.138521915 | dmol | 1 | H     | 0.000 |
|                                                                                              | C11          | -0.891648689 | -4.364424227 | -2.414974253 | dmol | 1 | C     | 0.000 |
|                                                                                              | H12          | -1.728932479 | -4.534627310 | -1.746575422 | dmol | 1 | H     | 0.000 |
|                                                                                              | N13          | -0.709653590 | -4.929330852 | -3.654621683 | dmol | 1 | N     | 0.000 |
|                                                                                              | H14          | -1.369576721 | -5.531592782 | -4.131505949 | dmol | 1 | H     | 0.000 |
|                                                                                              | C15          | -0.548077282 | -5.008792455 | 1.115788891  | dmol | 1 | C     | 0.000 |
| H16                                                                                          | -0.874242023 | -6.006925163 | 0.746236748  | dmol         | 1    | H | 0.000 |       |

|      |              |              |              |      |   |    |       |
|------|--------------|--------------|--------------|------|---|----|-------|
| H17  | -0.788306705 | -4.989959906 | 2.203604018  | dmol | 1 | H  | 0.000 |
| C18  | 0.994836750  | -4.955330681 | 1.016785015  | dmol | 1 | C  | 0.000 |
| O19  | 1.689266831  | -5.951062520 | 1.333163081  | dmol | 1 | O  | 0.000 |
| O20  | 1.455202771  | -3.808055813 | 0.606351861  | dmol | 1 | O  | 0.000 |
| O21  | -1.195788292 | -3.964034090 | 0.431966500  | dmol | 1 | O  | 0.000 |
| Fe22 | -0.010347567 | 5.160883958  | 0.074081304  | dmol | 1 | Fe | 0.000 |
| Fe23 | -1.432674466 | 2.672096336  | 0.931438310  | dmol | 1 | Fe | 0.000 |
| Fe24 | 1.285014030  | 2.805725411  | 0.854894270  | dmol | 1 | Fe | 0.000 |
| Fe25 | 0.017157392  | 2.752714186  | -1.478003786 | dmol | 1 | Fe | 0.000 |
| Fe26 | -0.082580803 | 0.192874532  | -1.512959298 | dmol | 1 | Fe | 0.000 |
| Fe27 | -1.515752543 | 0.008680395  | 0.759474578  | dmol | 1 | Fe | 0.000 |
| Fe28 | 1.212282091  | 0.171764636  | 0.887999035  | dmol | 1 | Fe | 0.000 |
| Mo29 | -0.010276614 | -2.246899361 | -0.025719696 | dmol | 1 | Mo | 0.000 |
| S30  | -1.741219021 | 4.078673453  | -0.825258292 | dmol | 1 | S  | 0.000 |
| S31  | -0.117061441 | 4.170402975  | 2.023789041  | dmol | 1 | S  | 0.000 |
| S32  | -0.021547145 | 1.500233110  | -3.319510058 | dmol | 1 | S  | 0.000 |
| S33  | 1.718061079  | 4.231251412  | -0.919327979 | dmol | 1 | S  | 0.000 |
| S34  | -1.906680553 | -1.186278117 | -1.143491865 | dmol | 1 | S  | 0.000 |
| S35  | -3.170947913 | 1.386893622  | 1.467315522  | dmol | 1 | S  | 0.000 |
| S36  | -0.155146908 | -1.225688675 | 2.171722025  | dmol | 1 | S  | 0.000 |
| S37  | 1.832688475  | -0.988595390 | -0.994852237 | dmol | 1 | S  | 0.000 |
| S38  | 2.746320564  | 1.483658006  | 1.901652611  | dmol | 1 | S  | 0.000 |
| N39  | -0.067555012 | 1.573846127  | 0.061963101  | dmol | 1 | N  | 0.000 |
| N40  | -0.981845833 | 1.828680615  | 4.176439694  | dmol | 1 | N  | 0.000 |
| H41  | -0.585983146 | 0.939850415  | 3.853197410  | dmol | 1 | H  | 0.000 |
| H42  | -0.643128672 | 2.065156673  | 5.113105232  | dmol | 1 | H  | 0.000 |
| H43  | -2.001269518 | 1.738246052  | 4.135286782  | dmol | 1 | H  | 0.000 |
